# Supplementary material for: Genome-wide CRISPR-dCas9 screens in E. coli identify essential genes and phage host factors
Source: PLoS Genet. 2018 Nov 7;14(11):e1007749. doi: 10.1371/journal.pgen.1007749 (PMC6242692; doi:10.1371/journal.pgen.1007749)
Supplement: S1 Table — Each sgRNA is indexed with its position, orientation (ori), target strand (coding) and computed fold change (log2FC, padj and gamma). Information on the targeted gene is also provided: name (gene), essentiality (essential), position (gene_left, gene_right) and orientation (gene_ori). (CSV) [file pgen.1007749.s011.csv]

target	position	ori	coding	gene	essential	gene_left	gene_right	gene_ori	log2FC	padj	gamma
ACCACGCACTCTGACCATCT	759974	+	FALSE	sucA	FALSE	757929	760730	+	-12.0288598174972	3.76442268172857e-20	0.585624103284732
TCACGGATATCGGTGCCAAT	1795544	+	TRUE	pheT	TRUE	1793581	1795968	-	-11.9474788267211	9.09927337242593e-21	0.587270487414865
AATCGTGGTGCCTTCCGCCA	3333995	+	TRUE	murA	TRUE	3333257	3334516	-	-11.9200208071197	2.84204005553146e-20	0.587828069467185
TCAGGTGCGATTTGTTCTGC	3601108	+	TRUE	ftsY	TRUE	3600773	3602266	-	-11.817648380308	6.18259611191373e-20	0.589916282399248
ATGGTCAAACCGATCATGTT	3448424	+	TRUE	rpsS	TRUE	3448270	3448548	-	-11.5298558364401	1.47506668300405e-18	0.595867013750785
GCACTGGCCTTTATAGTCCT	705479	-	TRUE	glnS	TRUE	705316	706980	+	-11.3424625356741	4.36320017312364e-20	0.599806737985538
TCCGGGAAGACACGTTCACC	92772	-	TRUE	ftsI	TRUE	91413	93179	+	-11.0976120538109	3.10138249776862e-17	0.605033622339244
TTACGCACCGCACGGCTTAA	671273	+	TRUE	lptE	TRUE	670828	671409	-	-11.0762944134926	3.84555533137628e-16	0.605493009498801
TGCTCACGACCGCGAACATC	3323993	+	TRUE	ftsH	TRUE	3323023	3324957	-	-10.9913869577207	4.33103520050332e-07	0.607329677006625
GCCGTCTTTTACCGTTTATC	2743386	+	NA	NA	NA	NA	NA	NA	-10.7934029176047	2.44613221243326e-16	0.611655940454559
CGATACCGGCGTCAAGCAGC	106895	-	TRUE	lpxC	TRUE	106557	107474	+	-10.760203283425	3.35616827856418e-11	0.612387446389859
AACCCATACTTTCACTTCCA	2742478	+	TRUE	rplS	TRUE	2742205	2742552	-	-10.7382930935524	7.11142025278063e-18	0.612871164878979
TTGGCGAGATCGCCACGCAT	22436	-	TRUE	ileS	TRUE	22391	25207	+	-10.7154470135456	8.39585651089357e-18	0.613376359821707
CAGAAGACCATGCTCGATGC	2638325	+	TRUE	hisS	TRUE	2637323	2638597	-	-10.7097897655011	2.05979512562575e-13	0.613501587123737
AGCGGCAGCAGGTTGACGAT	2335590	+	TRUE	gyrA	TRUE	2334815	2337442	-	-10.6782583919459	1.15422350558206e-17	0.614200494816785
GGTCGCTACCGGTTGCACCC	3450369	+	TRUE	rplC	TRUE	3450319	3450948	-	-10.6717955586304	1.21096782419957e-17	0.614343943239273
CAACATCAGACCTTTGCCGT	1150044	-	TRUE	fabG	TRUE	1149893	1150627	+	-10.6535926032232	1.41583707920378e-17	0.614748334652855
GTTACCGTGAGTAGCGTCCT	3450562	+	TRUE	rplC	TRUE	3450319	3450948	-	-10.6506416596069	1.44072261371475e-17	0.614813942087798
TTGCACACCTAACATAGAGT	54971	+	TRUE	lptD	TRUE	54755	57109	-	-10.5993616746056	2.17791867124446e-17	0.615956274656956
CGGCGCAGGGCGTAACGTCA	106630	-	TRUE	lpxC	TRUE	106557	107474	+	-10.5805671693319	2.59557807779278e-17	0.616376011980749
TCCCGGGAATACATGTCCAC	99687	-	TRUE	murG	TRUE	99644	100711	+	-10.5445654491583	3.45594580745626e-17	0.617181637204571
AGCCTTGCGCGATGCCCCAC	2861010	+	FALSE	ygbK	FALSE	2860357	2861523	+	-10.5161944737481	4.33008715963443e-17	0.617817991373005
TACCACCTTTCCTGATACCC	966112	-	TRUE	msbA	TRUE	965844	967592	+	-10.4289538733158	7.18980274801331e-15	0.619783024847273
TTCACGCTTAAACATACTCT	196386	-	TRUE	cdsA	TRUE	195677	196534	+	-10.4122017253615	1.01422571450446e-16	0.620161786722581
GGTGGCGGTGAAATCGCTGT	95380	-	TRUE	murF	TRUE	94650	96008	+	-10.3902277849687	1.19946633190676e-16	0.620659314462851
TTGTGCACCGGATCGTGTTC	3323681	+	TRUE	ftsH	TRUE	3323023	3324957	-	-10.3597540074115	7.31699651148652e-17	0.621350615776547
GCGCTTCTTCGACCACTTTC	3404646	-	TRUE	accC	TRUE	3403939	3405288	+	-10.3543713768385	3.79481506398752e-15	0.621472881456681
GCCGTCAACTTTCGCGTATT	496970	-	TRUE	adk	TRUE	496399	497043	+	-10.3427849424829	3.65271642863223e-14	0.621736228981812
TACTACGTCAAGGCTCTGAA	3450436	+	TRUE	rplC	TRUE	3450319	3450948	-	-10.3296579692438	1.95446725668291e-16	0.622034861143576
ATCATCATTGCCACCGGAAT	3625124	-	FALSE	rbbA	FALSE	3624826	3627561	-	-10.3291483339033	1.93750382505967e-16	0.622046460881131
ATCCTGGTTAACTTCGCCGA	202759	-	TRUE	lpxA	TRUE	202560	203348	+	-10.3281158249861	1.98419123532416e-16	0.622069962996018
GGCGGTGAAATCGCTGTTGG	95377	-	TRUE	murF	TRUE	94650	96008	+	-10.3166555039224	1.0179935137428e-16	0.622330943755503
CTGCAAAACGATCGGGACCG	3881907	+	NA	NA	NA	NA	NA	NA	-10.3029182058854	2.41788604949116e-16	0.622644065803029
ACATAATGGCGCGGATCATT	1177337	-	TRUE	lolE	TRUE	1176543	1177787	+	-10.2985440259837	2.51477991112175e-16	0.622743835122444
TTTGTTATTCAGTGCATGAC	107344	-	TRUE	lpxC	TRUE	106557	107474	+	-10.2934873967806	1.21461507426689e-16	0.622859210069477
TCCTGATCCGGCCTACATGC	4388433	+	NA	NA	NA	NA	NA	NA	-10.2909097321796	6.70079358683707e-15	0.622918039993176
AACGATGGACACCGAAGCCA	3882274	-	NA	NA	NA	NA	NA	NA	-10.2811738512779	2.86415683142465e-16	0.623140341858996
TTTGAACGTACGGTAGTTGA	4183500	-	TRUE	rpoC	TRUE	4183373	4187596	+	-10.2706112730815	3.11756683996577e-16	0.623381699433357
GTTCATCCGCCAGATACGTC	321092	-	TRUE	ykgE	FALSE	320832	321551	+	-10.267517826356	7.91693858959401e-12	0.623452420871558
GTATCCTTGACGATTAACTG	94875	-	TRUE	murF	TRUE	94650	96008	+	-10.262331771076	3.29209404506476e-16	0.623571018897077
TGGGAAGCGTGACCTTCAAC	3341711	-	TRUE	lptA	TRUE	3341402	3341959	+	-10.2436884486845	3.86977704902111e-16	0.623997739220252
CGCAGAGCTGCTCAACGTAC	2282219	+	FALSE	yejL	FALSE	2282151	2282378	+	-10.2243739821812	4.65353153767472e-16	0.624440437496444
AGCGTTCCAACGATCTTCGT	3444796	+	TRUE	rpsN	TRUE	3444601	3444906	-	-10.2141368422544	4.92739872001723e-16	0.624675333211551
CACGACAAACATCAGCCGTC	2818812	+	TRUE	alaS	TRUE	2817403	2820033	-	-10.2090398469602	2.31978333558786e-16	0.62479235193958
CCTTGCATACCAGGCATATT	3441701	+	TRUE	secY	TRUE	3440788	3442119	-	-10.2005081232042	7.11517778641067e-13	0.624988324593012
CTGGAAGGTCACATATTCCC	107398	-	TRUE	lpxC	TRUE	106557	107474	+	-10.1797402291151	6.45436765954325e-16	0.625465874827954
TCGCCAGCGCACAAGCTACT	3721082	+	TRUE	glyS	TRUE	3720351	3722420	-	-10.1661519960634	7.27249300874482e-16	0.625778726499926
CTGAATCGCACGTTCGGATT	967381	-	TRUE	msbA	TRUE	965844	967592	+	-10.1575482090462	3.42692432458873e-16	0.625976979554336
TCCGCCAGTTCAGCAATTTC	203259	-	TRUE	lpxA	TRUE	202560	203348	+	-10.1545177280929	7.71616204145168e-17	0.626046839433002
TCTACGCGGAACATGGTATT	925614	+	TRUE	infA	TRUE	925448	925666	-	-10.1340405429658	9.31301094838788e-16	0.626519296788148
CTGGCAGGCGCGGCATTTTC	98423	-	TRUE	ftsW	TRUE	98403	99647	+	-10.1316808860247	9.41100174186986e-16	0.626573785509785
GCTCCACTGCGCCAACAGCT	93536	-	TRUE	murE	TRUE	93166	94653	+	-10.1256847747936	9.92097506653553e-16	0.626712289151025
CACTTCCCAGCCCAGTCCCC	3722958	+	TRUE	glyQ	TRUE	3722430	3723341	-	-10.1252991760726	8.9472440040434e-08	0.626721198157173
CAGGTGCCGTTAGCCAGAGC	1154608	-	TRUE	tmk	TRUE	1154347	1154988	+	-10.0942544217308	1.26858884187663e-15	0.627439298952078
TCGTCGATGGTCGCACCAAC	1795388	+	TRUE	pheT	TRUE	1793581	1795968	-	-10.087482963266	1.04221317601503e-06	0.627596149227085
CATGTTGTTACGGTTCCAGT	218794	+	NA	NA	NA	NA	NA	NA	-10.0688077122029	8.57729714887435e-18	0.628029138953771
GCCAGATTGCTGCGGAACCT	195994	-	TRUE	cdsA	TRUE	195677	196534	+	-10.0633529720346	1.63551388448425e-15	0.628155721043384
TTAGCGAAGTGGCCAGCTTC	3450761	+	TRUE	rplC	TRUE	3450319	3450948	-	-10.0462132659262	1.86972645347408e-15	0.628553795418643
TTTAACGATCAGGTCGCTAC	3450358	+	TRUE	rplC	TRUE	3450319	3450948	-	-10.0241296009081	9.59565200776947e-10	0.62906743902785
TCGCCCATAAAGACCTGCGC	96779	-	TRUE	mraY	TRUE	96002	97084	+	-10.012969063703	2.45574235377952e-15	0.629327341245235
CAACCACGATCGCCCCGAGC	3977673	-	TRUE	rffT	TRUE	3976624	3977976	+	-10.0007830247402	1.11883318796051e-15	0.629611370322976
TGCCACCGTAGATGATTGCC	2280616	-	TRUE	rplY	FALSE	2280539	2280823	+	-9.981316794832	3.11722020885996e-15	0.630065616488228
TCCAGCCAGTGCAATTCCGA	1177656	-	TRUE	lolE	TRUE	1176543	1177787	+	-9.96171159175671	3.65963533071484e-15	0.630523768572526
CGACGTTAATCATATTGCGA	3443050	+	TRUE	rpsE	TRUE	3442748	3443251	-	-9.95936514822372	2.81748123826995e-11	0.630578647031682
TTTTGCCGACTGAACGCATA	2820151	-	NA	NA	NA	NA	NA	NA	-9.95889650574591	1.04573943139617e-11	0.630589608754078
GATCCCAGCTTATACGGTCC	3923896	-	NA	NA	NA	NA	NA	NA	-9.94800567264886	1.40912470891638e-12	0.630844456784953
GCTCTCATCTTTTCCAACGA	104781	-	TRUE	ftsA	TRUE	103982	105244	+	-9.93076358034891	4.64428177094957e-15	0.631248347239761
AAGTCTTGTTCATCGAAATC	195566	-	TRUE	ispU	TRUE	194903	195664	+	-9.92788508830174	4.7722881733878e-15	0.631315825370382
CTGTGTTCATCAGCACAAAG	4479913	+	TRUE	valS	TRUE	4479005	4481860	-	-9.89550033689652	6.16303581025467e-15	0.63207598992604
CTTCCAGAATCAGCACACCC	202283	-	TRUE	fabZ	TRUE	202101	202556	+	-9.88366684385529	2.69744089227248e-15	0.632354213386841
GGCGACCCAGGCTGCCGAAC	2975526	+	FALSE	galR	FALSE	2974621	2975652	+	-9.8695713170709	7.55332019734716e-15	0.632685940515898
AATGATATTGACCATACCGT	104067	-	TRUE	ftsA	TRUE	103982	105244	+	-9.86153404921562	7.99571899398378e-15	0.632875247141606
ACCGACACAGATGGCAGTAT	25625	-	TRUE	lspA	TRUE	25207	25701	+	-9.86077366904992	8.01527463143005e-15	0.632893162700972
ACTTATCTTTGTTGCACATC	3722453	+	TRUE	glyQ	TRUE	3722430	3723341	-	-9.85873599186135	1.57668188439277e-11	0.632941178064049
CCCGTGTGAACACCTTTAAC	3443001	+	TRUE	rpsE	TRUE	3442748	3443251	-	-9.83894157303878	2.84940775550542e-13	0.633407988677074
GCGTTCGCCACCGCATTTTC	1947150	+	TRUE	aspS	TRUE	1946774	1948546	-	-9.83017349593644	3.00453288396622e-43	0.633614985850715
CGCGAAAGGAAGATCGTCCT	201155	-	TRUE	lpxD	TRUE	200971	201996	+	-9.8274480481729	1.04366555577575e-14	0.633679355914652
TGCCGTGTTCATCCGCCATA	4253967	+	TRUE	plsB	TRUE	4252066	4254489	-	-9.813964613091	2.66176032644337e-41	0.633998002358082
GTTGCCGGGGCCGCACGATC	910060	+	TRUE	poxB	FALSE	908554	910272	-	-9.80130913799011	3.66179591318058e-17	0.634297373776528
TCAAACATTGTCTCTCGCCT	2745831	+	NA	NA	NA	NA	NA	NA	-9.79622241420762	1.33623105972779e-14	0.634417782373176
CTGGCACCCACGGAGCAAGA	93189	-	TRUE	murE	TRUE	93166	94653	+	-9.78173810117384	1.50486034954491e-14	0.634760893254157
AGCACGGCGTCGAGAGTATC	3333750	+	TRUE	murA	TRUE	3333257	3334516	-	-9.77943472004424	1.5363726857973e-14	0.634815490981055
GATACCGTTGTTCTTCGACT	672144	+	TRUE	leuS	TRUE	671424	674006	-	-9.77519646881161	1.20158066203797e-16	0.634915976052762
CAGTTCGAGCAGCACATAGT	1795210	+	TRUE	pheT	TRUE	1793581	1795968	-	-9.73784076156765	2.10647658699216e-14	0.635803023572323
GGCATAATGCGCTTCATGCT	3448017	+	TRUE	rplV	TRUE	3447923	3448255	-	-9.73760020860936	7.45277213974571e-07	0.635808743767741
GGCGGTCGATCTGAGACGCC	4178372	-	TRUE	rplJ	TRUE	4178019	4178516	+	-9.720095309696	2.42578318296826e-14	0.636225275507575
GTCGGCGCTCTTCCACAGAA	209324	-	TRUE	accA	TRUE	208621	209580	+	-9.69811723128496	2.89293526408773e-14	0.636749020641775
GCAGTGTTGCCAGCATATGT	1154694	-	TRUE	tmk	TRUE	1154347	1154988	+	-9.69352617140876	8.08742530412657e-12	0.636858536067392
ATGCGACCAGCAAGCGTTGT	2282527	-	TRUE	yejM	TRUE	2282398	2284158	+	-9.67001707610129	8.69234084844877e-10	0.637419914336445
TACCGCCTGGATGGTGTCAA	3720795	+	TRUE	glyS	TRUE	3720351	3722420	-	-9.66883436317905	3.77038707497634e-12	0.637448182717406
CGTACCACGGCGAAAGCTTC	108471	-	TRUE	secA	TRUE	108279	110984	+	-9.66702549178377	3.66600809727277e-14	0.63749142195247
CGTCAATGCGCAGATCCGCC	3033598	+	TRUE	prfB	TRUE	3033206	3034304	-	-9.662165444078	1.46693851840183e-16	0.637607625519251
ATAGCCATCGACTTCACTGT	1175224	-	TRUE	lolC	TRUE	1174650	1175849	+	-9.65362905399196	1.87968658273391e-12	0.637811832886369
TTTCGCCGGTCGCCATATCG	1948294	+	TRUE	aspS	TRUE	1946774	1948546	-	-9.65181529494908	2.65084869936576e-20	0.637855238446807
TTCTTACGTAGCTCCCCGAT	3451393	+	NA	NA	NA	NA	NA	NA	-9.64503032546821	2.81727259647223e-19	0.638017663794919
GGGCGCACTGGGCCTGGCGA	2565943	-	FALSE	eutH	FALSE	2564903	2566129	-	-9.64117511703192	1.62329895963312e-14	0.638109990468542
CATTAAGGAACTTCGCTACC	1947448	+	TRUE	aspS	TRUE	1946774	1948546	-	-9.64013535608935	4.50078352655353e-14	0.638134895816667
ATTCAGATGCACTGTCAACA	2818683	+	TRUE	alaS	TRUE	2817403	2820033	-	-9.63977111371775	4.53589495853754e-14	0.638143620957993
GTGCTGCCAGTTCCAGATAG	1154862	-	TRUE	tmk	TRUE	1154347	1154988	+	-9.63867322132541	4.51625831844416e-14	0.638169921555656
TGCGGCAGGTCGATGTCCAG	94857	-	TRUE	murF	TRUE	94650	96008	+	-9.63639520454076	3.40842282120978e-17	0.638224499578756
CGCACCCATGTAGTTACCAA	3511610	+	TRUE	trpS	TRUE	3510656	3511660	-	-9.61991250136679	5.26075187057357e-14	0.638619679877879
GATCCGGTCATTTTCTCAAT	2964004	-	FALSE	lgt	TRUE	2963184	2964059	-	-9.61628849497785	5.42765013394622e-14	0.638706632715064
GCTGTTTTGACGCGGACGTT	674083	-	NA	NA	NA	NA	NA	NA	-9.60786310718739	2.07174653452788e-14	0.63890887936085
GTACCGGCTTCAGGCCATCT	2337331	+	TRUE	gyrA	TRUE	2334815	2337442	-	-9.58985546613063	2.27437084881989e-37	0.639341572264434
GCCATTGCTGCGTGGATGAT	1143891	+	FALSE	yceQ	TRUE	1143725	1144045	+	-9.58107370075253	2.70931718294979e-14	0.639552795774338
CGCCGCCACCAGGAAAGTAC	3333812	+	TRUE	murA	TRUE	3333257	3334516	-	-9.57381051928423	7.53077418867041e-14	0.639727599008179
AGCGCCGCCATTGAGTCTTC	939542	-	TRUE	serS	TRUE	938651	939943	+	-9.56387313697772	8.12690195327494e-14	0.639966917186315
CCACGGCGCGACCGGTAAAC	102552	-	TRUE	ddlB	FALSE	102233	103153	+	-9.54531488539973	4.55827413680735e-10	0.640414328230486
TCCAGCGGCTGACGCGCTAC	2517550	+	TRUE	gltX	TRUE	2517279	2518694	-	-9.54517499637133	8.02649712196685e-10	0.640417703116437
GGCTGCCATCGCCGGAAACG	3334768	+	TRUE	ibaG	FALSE	3334571	3334825	-	-9.53249941561265	7.01612702608144e-09	0.640723654930022
GCGACCAGGGCAATCGTTAA	203363	-	TRUE	lpxB	TRUE	203348	204496	+	-9.52707512794992	1.08081837870218e-13	0.640854670859968
TCACGGGCGGCATTTTTATC	203873	-	TRUE	lpxB	TRUE	203348	204496	+	-9.52416471429279	7.08335269278533e-09	0.640924989839148
GATTGCGGCAGGCGCGCCTG	1958151	+	FALSE	argS	TRUE	1958086	1959819	+	-9.52225565460349	1.1164577803123e-13	0.64097112332334
CGTTCGTGTCAGGAGTTGCA	669926	+	TRUE	holA	TRUE	669797	670828	-	-9.52008052225958	1.13490823933746e-13	0.641023694695462
CCGCTGATAGAGAGTGCATC	4486076	-	TRUE	lptG	TRUE	4485341	4486423	+	-9.516072331496	1.1858880171339e-13	0.641120592351352
GTCTGGGTCAGCCGAATCCC	4423086	-	NA	NA	NA	NA	NA	NA	-9.5101646538467	1.23254782898276e-13	0.641263463353603
TGACCAATGACGCGACGACG	3472099	+	TRUE	rpsG	TRUE	3471564	3472103	-	-9.50128494068712	1.64297366524292e-11	0.641478329750724
TTAATCGCCCGATAGATGAC	660204	+	TRUE	ybeF	FALSE	659648	660601	-	-9.49529939893024	1.41849581332713e-13	0.64162324584588
GCCAGTAACTTGGCAGACTC	3809692	+	TRUE	rpmB	TRUE	3809461	3809697	-	-9.48480160031123	1.49987666311013e-13	0.64187756648327
CAGGGGCCAACGAAGCTCCA	3334476	-	FALSE	murA	TRUE	3333257	3334516	-	-9.48364648390141	2.17868551726509e-12	0.641905562752991
CGCGCGGCGATGATATCCAC	2843042	-	FALSE	hycE	FALSE	2842784	2844493	-	-9.47854149011144	1.11178941107702e-10	0.642029320472532
GATCAATACCGCCACGCCGA	1176646	-	TRUE	lolE	TRUE	1176543	1177787	+	-9.47834220747285	1.55583829466111e-13	0.642034152546082
AGCATGGCAAACGGGAAGTT	2963587	+	TRUE	lgt	TRUE	2963184	2964059	-	-9.47682780962885	1.62600310336686e-13	0.642070875039554
TCGGGTTCCAGTAACGGGTC	189927	-	TRUE	rpsB	TRUE	189874	190599	+	-9.47448646625143	1.5875745649264e-13	0.642127658327609
CCCTTTCATTACCACAAAGC	939129	-	TRUE	serS	TRUE	938651	939943	+	-9.47146212153575	1.5980041911681e-08	0.642201020931508
CCGTGGAAGCTGCCGGCAAC	1795859	+	TRUE	pheT	TRUE	1793581	1795968	-	-9.4517541128956	1.93773603665557e-13	0.642679495939827
CTTTTCGTACTAGCGTGTCA	3210163	-	TRUE	dnaG	TRUE	3209129	3210874	+	-9.43895623073428	4.41814569930609e-11	0.642990587511853
TTTCGCCCATAAGCCTTGCT	4485783	-	TRUE	lptG	TRUE	4485341	4486423	+	-9.43697326963014	8.53898509839519e-15	0.643038816381034
CAGCAGTGCTACCTGAACTT	3309632	+	TRUE	rpsO	FALSE	3309437	3309706	-	-9.43568134289987	2.18757146819258e-13	0.643070242052448
ACACTTTCTTACCGCGAATC	3448189	+	TRUE	rplV	TRUE	3447923	3448255	-	-9.43315813754602	2.23742529453101e-13	0.643131627009524
CCACGCCCATATCGAAGACA	3340064	-	TRUE	kdsD	FALSE	3339288	3340274	+	-9.40954134100703	2.69981990094544e-13	0.643706749030264
AGGCGGAGAAGCAGATCAGC	2431486	+	TRUE	accD	TRUE	2431034	2431948	-	-9.40476493832153	2.79226263354705e-13	0.643823190235173
TCTTTCATCCACAGCGGAGT	1795283	+	TRUE	pheT	TRUE	1793581	1795968	-	-9.40118982515781	2.8560447966225e-13	0.643910373455996
ACGGCCTTACAACTACAACT	3209048	-	NA	NA	NA	NA	NA	NA	-9.37945311909164	3.36680324975947e-13	0.644440956499457
ACCGGTCGTCACCTGGTTAG	55448	+	TRUE	lptD	TRUE	54755	57109	-	-9.37549343936129	3.47891732972059e-13	0.644537704634188
GTCGATCAGCAGTGCATCTA	3881069	+	TRUE	dnaA	TRUE	3880349	3881752	-	-9.37527652709186	3.45490988889995e-13	0.644543005361029
TGTGCGCCACTAAAAACGAT	3511650	+	TRUE	trpS	TRUE	3510656	3511660	-	-9.37206534787983	3.56529350037179e-13	0.644621487765527
CCCATAGCAAAACCGACAGC	2637696	+	TRUE	hisS	TRUE	2637323	2638597	-	-9.35679780864097	4.02348126960654e-13	0.644994893667493
GTAACGTTGCGCGTGACAAA	57157	+	NA	NA	NA	NA	NA	NA	-9.33363135127311	4.79315677157715e-13	0.645562314336041
AGTCATTACGACTTTGTCGA	3449763	+	TRUE	rplD	TRUE	3449703	3450308	-	-9.32848381555734	4.9974625784657e-13	0.645688529544372
TTTGGTACGCACGACTTCGT	3443668	+	TRUE	rplF	TRUE	3443629	3444162	-	-9.32164849542048	2.15893004582827e-20	0.645856204749399
GGCTGTCAGCGACAACAACC	2744156	+	TRUE	rpsP	TRUE	2743959	2744207	-	-9.31986399014033	2.04481157095831e-10	0.645899994254087
TATCGACGTCTTTCAGTTTC	3334384	+	TRUE	murA	TRUE	3333257	3334516	-	-9.31070951087141	1.44763363391277e-16	0.646124727004253
CGACAACCGTTATGAGGGAT	3439777	+	TRUE	rpsK	TRUE	3439731	3440120	-	-9.3054061739925	5.93547456722284e-13	0.646254989851002
GAGCGAGCACCATGATCATC	1798158	+	TRUE	infC	TRUE	1798120	1798662	-	-9.30337652535215	5.42180766818726e-12	0.646304856854206
TGCCAGGCGAACGTAATCCA	208844	-	TRUE	accA	TRUE	208621	209580	+	-9.30241904872387	6.02595104960482e-13	0.646328384036023
AGATGGTCAGTTGGGGGCAC	2282459	+	FALSE	yejM	TRUE	2282398	2284158	+	-9.29733209998907	1.9774053856313e-13	0.646453409622
GTACATCGCGACGTGCCATC	3323184	+	TRUE	ftsH	TRUE	3323023	3324957	-	-9.29299349699814	1.80899843190729e-26	0.64656008080407
GATCAGAAATAGTTGCGCCC	2744021	+	TRUE	rpsP	TRUE	2743959	2744207	-	-9.29013685204328	2.066512536248e-13	0.646630335006368
CCGCGTTGCCAGAGAAGATC	1260348	+	TRUE	prs	TRUE	1260151	1261098	-	-9.28435849398496	7.01475069256257e-13	0.646772490334522
AAAAGCCATTGACTCAGCAA	563900	+	NA	NA	NA	NA	NA	NA	-9.27092069879416	7.68604770414105e-13	0.647103319861199
CACCCCGATTATTTCTTGAT	3440150	+	TRUE	rpsM	FALSE	3440137	3440493	-	-9.26182092263801	8.27999003508853e-13	0.647327542521844
GGTGAGGACAGTTTTCTTCA	2335481	+	TRUE	gyrA	TRUE	2334815	2337442	-	-9.26113607151285	1.56188990150924e-10	0.647344423855334
CTTCTTCCAGCGGACGAGTA	939304	-	TRUE	serS	TRUE	938651	939943	+	-9.25132182752616	3.11055901517593e-13	0.647586438187445
GATGGTTTCGCCGTCGAAGT	4345254	+	TRUE	fumB	FALSE	4343703	4345349	-	-9.23553751618745	6.80412878787802e-08	0.647976051167655
TGCGAACCGGTAATCTGTTT	4485989	-	TRUE	lptG	TRUE	4485341	4486423	+	-9.23142243280318	3.14898524809958e-13	0.648077703126804
TTCGTTGATGTCGTACTGTT	4176954	-	TRUE	rplA	FALSE	4176902	4177606	+	-9.22820499346087	1.48704003088418e-17	0.648157203447143
TCGCCAGCTTTCAGGCCTTT	3449067	+	TRUE	rplB	TRUE	3448565	3449386	-	-9.22455420689461	1.1055576999969e-12	0.64824743505194
CGCCGGTTTCGCCAGGACAT	4480703	+	TRUE	valS	TRUE	4479005	4481860	-	-9.2197899688553	1.14124031126508e-12	0.648365224137689
GTATGTGTAGGATCAAGCTC	3984341	+	NA	NA	NA	NA	NA	NA	-9.21160046930664	1.22015959069922e-12	0.648567798059746
CGGTGGTCACCTGAATAGCA	3450813	+	TRUE	rplC	TRUE	3450319	3450948	-	-9.2092757599097	1.22772655213695e-12	0.648625324702928
TGACGTCTTCTACCACGCGA	3342010	-	TRUE	lptB	TRUE	3341966	3342691	+	-9.19809583221153	1.43302125876428e-22	0.648902122844282
GTAGCGCTGACGCTCGGTGA	3722547	+	TRUE	glyQ	TRUE	3722430	3723341	-	-9.19576749808945	1.36797080877606e-12	0.64895979861021
GACTTTAATCACCGCGTCAT	105327	-	TRUE	ftsZ	TRUE	105305	106456	+	-9.18514547368582	5.35612625941232e-13	0.649223049651711
TCAACCGCTGGCCGGTAAAC	3893004	+	FALSE	yieF	FALSE	3892675	3893241	+	-9.18450590684064	1.49031185498983e-12	0.649238907179791
ATACATGAGTACCCAGAACC	2818308	+	TRUE	alaS	TRUE	2817403	2820033	-	-9.17971312422397	1.54955855773314e-12	0.649357764897354
TTTGTAGTTGTCCCAGTGAC	1799674	+	TRUE	thrS	TRUE	1798666	1800594	-	-9.17701220096378	3.11763050502279e-11	0.649424765114106
CTCTCCCATCCCGTAAATCA	1154074	-	TRUE	mltG	FALSE	1153335	1154357	+	-9.1758587482972	1.55226757652328e-12	0.649453382350097
AATGCGGAAGTCAGTTTCAT	1338982	-	TRUE	lapB	FALSE	1338582	1339751	+	-9.17505186224154	4.72245353308789e-13	0.64947340274512
CGACATCAACATCAGGCTTA	3572494	+	TRUE	asd	TRUE	3571798	3572901	-	-9.17170994982371	1.63237773709843e-12	0.649556335164662
GGTCTTTAACACGACCGCCA	3472328	+	TRUE	rpsL	TRUE	3472200	3472574	-	-9.17147727036341	8.95854883804362e-09	0.649562110093449
GTTTTCGCCGTAGCGACCAT	3723144	+	TRUE	glyQ	TRUE	3722430	3723341	-	-9.15765808717894	1.82041679224848e-12	0.649905276051164
GAAGGAACGTTTAGTACGGC	2963709	+	TRUE	lgt	TRUE	2963184	2964059	-	-9.15764605556987	1.83174097300236e-12	0.649905574985029
GTATGCGGCCCCATCAATAC	3807595	-	TRUE	waaA	TRUE	3806563	3807840	+	-9.15630990668362	5.39613755779989e-13	0.649938774263263
GTCGAAAAGACCCTGCTTGA	3881840	+	NA	NA	NA	NA	NA	NA	-9.1556106050108	1.84572814818074e-12	0.649956151157228
AAGACGAATGTGAATTGACT	3882558	-	TRUE	rnpA	TRUE	3882516	3882875	+	-9.14140303250973	2.05657153254556e-12	0.650309395362545
ACGGACCTTCATCCCACTCC	2518499	+	TRUE	gltX	TRUE	2517279	2518694	-	-9.13349030596949	7.05522280635115e-20	0.650506296746624
GATAAGACGAAAATCGGGCA	1262718	+	TRUE	lolB	TRUE	1262100	1262723	-	-9.1238511029046	2.35218490094963e-12	0.650746321169693
GTCATAACCGGAAAGCCCTT	22632	-	TRUE	ileS	TRUE	22391	25207	+	-9.12317795868529	7.78550122161198e-13	0.650763089654945
TAATTACCCTTCTTCTGTGC	3341936	-	TRUE	lptA	TRUE	3341402	3341959	+	-9.1210168892302	2.41046313905974e-12	0.650816929221816
CCACACAGAAGTTATAGGTT	2518160	+	TRUE	gltX	TRUE	2517279	2518694	-	-9.10734976030472	9.43439900576216e-13	0.651157630172324
GATTGCAGCACTGATAATCC	4548225	+	TRUE	gntP	FALSE	4547976	4549319	-	-9.10731425061828	7.65628817350803e-13	0.651158515839959
TCACCTGGTTATCGTCGTAA	56779	+	TRUE	lptD	TRUE	54755	57109	-	-9.08613497451107	1.90046703922458e-10	0.651687190019173
GATAACCGGCGTCAGGATCA	1079117	-	TRUE	putP	FALSE	1078528	1080036	+	-9.08605018171424	1.06678642541304e-12	0.651689308330651
TGACCGCATACTCCCTTAGC	2816635	+	TRUE	serV	FALSE	2816575	2816667	-	-9.08481781940117	4.64459996317222e-15	0.651720097019649
GAATGCCTGCAGACGTTTTT	2742445	+	TRUE	rplS	TRUE	2742205	2742552	-	-9.08146420381109	3.13378548549981e-08	0.651803896712053
AATAAGCCGCGCATTCCTTT	3209075	-	NA	NA	NA	NA	NA	NA	-9.07180929384568	9.82444578991151e-13	0.652045272669776
GACCGTTTTCTAACTCTACG	925600	+	TRUE	infA	TRUE	925448	925666	-	-9.06970608981515	3.52388163484615e-12	0.652097877184796
TCAAAACCCAGGGCCTCAAC	3315985	+	TRUE	rimP	FALSE	3315576	3316028	-	-9.06924221951365	3.53211895466172e-12	0.652109480469477
GTATGCTCGCTTTTATAGGT	3340975	-	TRUE	lptC	TRUE	3340858	3341433	+	-9.06591402852735	3.61139489950121e-12	0.652192744186706
CTTTCGGTGAGGTGAACGGA	1947202	+	TRUE	aspS	TRUE	1946774	1948546	-	-9.05803864507568	1.22097233621284e-12	0.652389852956664
CGCTTGCGGCTGCTCTTCAA	3602114	+	TRUE	ftsY	TRUE	3600773	3602266	-	-9.05632555891445	1.09847795656819e-12	0.652432744653972
CCAGTTTCTGGAACTCTGCA	4480876	+	TRUE	valS	TRUE	4479005	4481860	-	-9.0533457282878	3.93290981577315e-12	0.652507366128489
TGTGGTGTAGCGATCCTGAC	4272425	-	TRUE	ssb	TRUE	4272148	4272684	+	-9.04836947965572	1.33605176878836e-11	0.652632020337293
ATAACGACCGCCTGCACACA	2637755	+	TRUE	hisS	TRUE	2637323	2638597	-	-9.03604003398114	4.36504445460173e-12	0.652941076208683
GGATCAGTATACCCGCTGGA	3723400	+	NA	NA	NA	NA	NA	NA	-9.03525440422731	4.51169205625483e-12	0.652960779105724
GCGCATTCCTTTCGGAAGCA	3209067	-	NA	NA	NA	NA	NA	NA	-9.02549955563769	6.59515406176775e-08	0.6532055211335
CCGCCATCGCTTCCGGGTTA	209448	-	TRUE	accA	TRUE	208621	209580	+	-9.02425464751641	8.76504943299354e-17	0.653236768170894
CGCGTTCACCCAGCGGGTAA	3876268	+	TRUE	gyrB	TRUE	3875728	3878142	-	-9.02238163785374	5.00597000813224e-12	0.653283786110906
AACGGCATCGTTGAAGCGGA	4423370	-	TRUE	rpsF	FALSE	4423141	4423536	+	-9.01690458459319	5.15426054742432e-12	0.653421314773439
TTCTAACTCTACGCGGAACA	925607	+	TRUE	infA	TRUE	925448	925666	-	-9.0075219415434	5.59697409549462e-12	0.653657047303875
AAATTTCGGTGCGATATCAC	2598516	-	TRUE	bcp	FALSE	2598500	2598970	+	-9.00654437996067	5.61931201152885e-12	0.65368161765849
CTTCGGTTTTGCGCGAAGCG	1992580	+	TRUE	uvrC	FALSE	1990898	1992730	-	-8.97892174397273	6.95326083688985e-12	0.654376658413242
GTATCCACACTTATTTCATG	3211040	-	NA	NA	NA	NA	NA	NA	-8.97824629700442	2.23684804374812e-12	0.654393672522856
GCTTCGACGATGGCGTTGAA	197512	-	TRUE	rseP	TRUE	196546	197898	+	-8.97701871615319	7.06128598666571e-12	0.65442459682369
CCTCCAATTGTTTAAGACTG	1798692	+	TRUE	thrS	TRUE	1798666	1800594	-	-8.97042844422055	7.40397048669095e-12	0.654590664012829
TTTAAAGCGGGTCTGCATAT	2172170	-	FALSE	gatC	FALSE	2170945	2172300	-	-8.95986448277392	9.54745148785859e-08	0.654857039461073
TCTGCACGACCTTTTGCACG	3447996	+	TRUE	rplV	TRUE	3447923	3448255	-	-8.95411488459045	9.16663853839359e-24	0.655002109514946
ACGGACGAATTTACCCAGTT	3807053	-	TRUE	waaA	TRUE	3806563	3807840	+	-8.95224786284237	2.26397490657737e-12	0.655049230796692
GACGTTTACGTTAGAACGAT	3881372	+	TRUE	dnaA	TRUE	3880349	3881752	-	-8.94234210159094	9.10096020281415e-12	0.655299353212887
CGGCAACAGTCGTAACTCCT	439351	+	TRUE	dxs	TRUE	437539	439401	-	-8.93554823146556	1.98402003590773e-16	0.655471010224308
TTTCGCAGCAATCTGTAGGC	25737	-	NA	NA	NA	NA	NA	NA	-8.93392095165138	9.7170795180065e-12	0.655512139166812
TACGCCACCTTTGAGAATCT	3809821	-	NA	NA	NA	NA	NA	NA	-8.92833030631889	1.01484824468553e-11	0.65565348015707
TGGCATCGCAGGTTGCGTTT	1262190	+	TRUE	lolB	TRUE	1262100	1262723	-	-8.91447105996488	7.03274343039116e-32	0.656004128375331
CGGGGCTTTCATCCGTTACC	3330871	+	NA	NA	NA	NA	NA	NA	-8.91433875901192	1.01294371603331e-11	0.656007477485341
GCGGCTCATGCGCAGACGTT	3820004	-	TRUE	gmk	TRUE	3819451	3820074	+	-8.91051012554157	4.64298409608523e-24	0.656104411593273
ACAATTACGCCCGGGCAACC	100693	-	TRUE	murG	TRUE	99644	100711	+	-8.90683949510467	2.42121591727005e-07	0.656197372250378
ACGGATGAGGATCACGCCCT	2334986	+	TRUE	gyrA	TRUE	2334815	2337442	-	-8.90523639881484	3.70276121996411e-30	0.656237979776851
ACGGCGGATACGGTACGGTT	99118	-	TRUE	ftsW	TRUE	98403	99647	+	-8.90334090083186	1.21786990137439e-11	0.656286000523356
AGTCTCCCAGATGGTCAGTT	2282451	+	FALSE	yejM	TRUE	2282398	2284158	+	-8.90108069618606	1.24085858848996e-11	0.656343269974185
ATCAGTGGTTACAGCATCAA	94717	-	TRUE	murF	TRUE	94650	96008	+	-8.89960950734755	1.24729196804559e-11	0.656380552578494
AGGAAGCGGCGATGACCGCG	103741	+	FALSE	ftsQ	TRUE	103155	103985	+	-8.8847161932928	1.39985184598491e-11	0.656758214888406
CAGACGACGATTCTCGTTAA	4485876	-	TRUE	lptG	TRUE	4485341	4486423	+	-8.88045180894409	3.3096570232529e-16	0.656866430520542
CAACGGATTTCACAGCAGTC	200841	-	TRUE	skp	FALSE	200482	200967	+	-8.87024566740901	4.54395710828008e-12	0.657125572696682
ATCGCGCGCCCACTCCGCAG	3334613	+	TRUE	ibaG	FALSE	3334571	3334825	-	-8.86587305987839	5.1095199224263e-54	0.657236659309575
TGATTTTAGCGCGGGTTTTC	1948135	+	TRUE	aspS	TRUE	1946774	1948546	-	-8.86473848186411	1.57070706582719e-11	0.657265489535883
TGGATTTACCCGCGCCACTG	3819483	-	TRUE	gmk	TRUE	3819451	3820074	+	-8.84239858663907	2.6263472162757e-07	0.657833673720568
CGCAGCGGTACATTCGCCGT	22028	-	TRUE	ribF	TRUE	21407	22348	+	-8.82908881600397	2.94074013226942e-31	0.658172656461138
CAATGTGGCTGGCAACACGA	2963928	-	FALSE	lgt	TRUE	2963184	2964059	-	-8.82592103852271	1.32639385777766e-09	0.658253387154801
GTGGCGATCAGTCTCGGCGT	3030595	+	FALSE	uacT	FALSE	3029389	3030837	+	-8.82588517884407	1.21418446803757e-23	0.658254301150769
CACTTTTGGATCAGGGAGTT	4170726	-	TRUE	murB	TRUE	4170080	4171108	+	-8.82091900626519	2.2400576824959e-11	0.658380904098538
GAACGCATGACGCCGAAACG	218342	+	TRUE	proS	TRUE	217057	218775	-	-8.82073179995633	2.20451506862234e-06	0.658385677513166
CGTAAGTAGTTGGCTTTATA	194812	+	NA	NA	NA	NA	NA	NA	-8.81757495837618	2.26865485688384e-11	0.658466181560734
CTCTGCCCTTGAGTTTAGCG	4423027	+	NA	NA	NA	NA	NA	NA	-8.81634475579258	5.73133083636473e-12	0.658497558845374
AATACCGCCTTCACGCAGTC	102315	-	TRUE	ddlB	FALSE	102233	103153	+	-8.81363029605518	5.40759902398633e-16	0.658566803856253
TTTACCAGAGCGCTGAGCCA	3471957	+	TRUE	rpsG	TRUE	3471564	3472103	-	-8.81264910472379	2.34906102970078e-11	0.658591837320911
GCAATACGTTGTGCTAGTTC	1261061	+	TRUE	prs	TRUE	1260151	1261098	-	-8.79436472767529	2.76351326659753e-19	0.659058681207231
ACCGCCAGGTGCGTGGAAAC	3405002	-	TRUE	accC	TRUE	3403939	3405288	+	-8.79350174667205	2.67398117238199e-11	0.65908073153322
GTCTACCACTTCTGTGAAAG	4481980	+	TRUE	holC	FALSE	4481860	4482303	-	-8.79319716821593	2.74116452348189e-11	0.659088514274939
TAAACTGGCGATGCAGGTTG	3720563	-	FALSE	glyS	TRUE	3720351	3722420	-	-8.78187029046369	2.92994297396399e-11	0.659378074921432
AATATCTTTCCCGCCAGGAC	2194282	-	TRUE	metG	TRUE	2192322	2194355	+	-8.78082456246205	2.96733945458813e-11	0.659404820773371
GGAAACCAGCGGTACCTTCG	863921	+	TRUE	moeB	FALSE	863603	864352	-	-8.76760315377553	5.76594644331415e-10	0.659743162705031
ATACCGCCAAACAGTACGAA	1267439	-	TRUE	kdsA	TRUE	1267388	1268242	+	-8.76679614244252	3.31994889311216e-11	0.659763825739979
GAACGGTTGTTACCGGTCAC	3809663	+	TRUE	rpmB	TRUE	3809461	3809697	-	-8.76492270817032	3.39485775584945e-11	0.659811798876817
CGCCATAAGTTGGATCGGTC	554271	-	TRUE	cysS	TRUE	553834	555219	+	-8.75757382692123	5.29301722949507e-16	0.660000049470187
CACTGCTGCGTCACCAATAA	1958492	-	TRUE	argS	TRUE	1958086	1959819	+	-8.75467697104077	3.6397731699236e-11	0.660074285502212
GAATTGCGCGGCGTTCAACC	3398752	+	TRUE	mreB	TRUE	3398066	3399109	-	-8.75274309031433	7.20941008133459e-17	0.660123853229202
AGTAAGGCAATTGATGTTAA	2817725	-	FALSE	alaS	TRUE	2817403	2820033	-	-8.74070217942874	4.03627057314058e-11	0.660432644047525
ACGCCCTGCTGACCCAGAGC	4176545	-	TRUE	rplK	FALSE	4176470	4176898	+	-8.73666048608751	4.17200649070026e-11	0.660536358599816
ATCTTCAGTCACGTTCAGAA	97613	-	TRUE	murD	TRUE	97087	98403	+	-8.73329104851313	4.27191546695787e-11	0.660622847188536
GCATTTTTTCCAGTACGTAG	3321168	+	TRUE	glmM	TRUE	3320755	3322092	-	-8.72781368926703	4.44512965523206e-11	0.660763491422979
CCGATTTTCACGTTCGAGAG	4598873	+	TRUE	dnaC	TRUE	4598261	4598998	-	-8.72690784266724	4.40110827292916e-11	0.660786756961365
GTCGCGATCGATGATCGGCC	205460	-	TRUE	dnaE	TRUE	205126	208608	+	-8.72191012081045	8.82694396518581e-06	0.660915146665024
TCAGCAGAACTGCTGCCGGC	4176688	-	TRUE	rplK	FALSE	4176470	4176898	+	-8.72076513470101	1.33964758465691e-09	0.660944567977278
TACTCGTCAGCGATGCTTGC	3438084	+	TRUE	rpoA	TRUE	3438062	3439051	-	-8.71501130424069	1.3575997571822e-11	0.661092456809323
ATCGCATCCGGGAAGCGTTC	3807373	-	TRUE	waaA	TRUE	3806563	3807840	+	-8.71344790277803	1.20291183633877e-08	0.661132651843371
CTACCTGACGAACAGCGTCC	670726	+	TRUE	holA	TRUE	669797	670828	-	-8.70907436108497	1.38896831665608e-11	0.661245121517575
CGTTCGATAGCCACTGGCTC	3601962	+	TRUE	ftsY	TRUE	3600773	3602266	-	-8.70683082350107	1.1378624551083e-07	0.661302831014808
CTGGCGCATAAACGCATCAG	107089	-	TRUE	lpxC	TRUE	106557	107474	+	-8.7036090743761	5.21378000379893e-11	0.661385720223518
CGCAAGCTGTTGAGCGGAAT	1262338	+	TRUE	lolB	TRUE	1262100	1262723	-	-8.68561330965491	6.07458306769835e-11	0.661849097977735
TCGCAGATACGTGTACGAAC	3312452	+	TRUE	infB	TRUE	3311364	3314036	-	-8.68537181680685	7.85981627838433e-12	0.661855320656729
GGCCAGGCATGATCCTTTCC	1261176	+	NA	NA	NA	NA	NA	NA	-8.68405589890722	1.93287423185509e-15	0.661889230692856
TTCGATCGCGTTGTTTTGCA	3881114	+	TRUE	dnaA	TRUE	3880349	3881752	-	-8.68391819793751	4.64395156081079e-74	0.661892779325436
CAATTTCACAATTCGTCAGC	2743688	+	TRUE	rimM	FALSE	2743392	2743940	-	-8.68123100513911	6.05770255052422e-11	0.66196203743497
TGAGTAGCAACATACTCCGG	2517751	+	TRUE	gltX	TRUE	2517279	2518694	-	-8.68024017534578	8.90214902808957e-07	0.661987578150487
CTGCACGCTGGAAACCGAAT	3879322	+	TRUE	dnaN	TRUE	3879244	3880344	-	-8.67452708691466	6.56507051030937e-11	0.66213488343722
TGCTTACAGCAAACAGTGTG	168572	+	FALSE	fhuA	FALSE	167484	169727	+	-8.67069040583248	6.72984445997422e-11	0.662233844561404
CTTGATCGACAGCGGTTGAC	3404888	-	TRUE	accC	TRUE	3403939	3405288	+	-8.65234176587072	9.5134260101196e-07	0.662707528036202
TACTAAAGCGGCAACCTTCG	104031	-	TRUE	ftsA	TRUE	103982	105244	+	-8.64581056372205	7.91357015158704e-11	0.662876299337865
ACGACGGGACCAAGTGCGCA	3448459	+	TRUE	rpsS	TRUE	3448270	3448548	-	-8.64372116100948	1.88037356601783e-11	0.662930309266036
TGGGGCATTGCGCCACACTA	104671	+	FALSE	ftsA	TRUE	103982	105244	+	-8.64066504241782	8.31813579973996e-11	0.663009324129331
AATACTCTTTACCTGTTACC	4598284	+	TRUE	dnaC	TRUE	4598261	4598998	-	-8.62840844603657	9.05005446591354e-11	0.663326403424363
AGTAGATAAGTTCTGACAAC	2192633	-	TRUE	metG	TRUE	2192322	2194355	+	-8.62189447888572	9.41363686827079e-11	0.663495043819231
AGAGAAGTCGCAACCATATT	3722026	+	TRUE	glyS	TRUE	3720351	3722420	-	-8.6028095087606	1.10940219798364e-10	0.663989629504647
CCCAGACCCGCCATAACTTT	3444290	+	TRUE	rpsH	TRUE	3444175	3444567	-	-8.60256360317223	2.7420560635241e-11	0.663996006942588
TCTTTTTCAACGTTATACAG	3883483	-	TRUE	yidC	TRUE	3883099	3884745	+	-8.59961423973212	3.32206377832435e-09	0.664072506749535
CTGCATTAAGCATTATACGT	4177646	-	NA	NA	NA	NA	NA	NA	-8.59219853909146	2.67795824489007e-11	0.664264931128637
CACGGCTGCGGGTTCCTTCC	3161068	+	TRUE	plsC	TRUE	3160766	3161503	-	-8.58935012471559	8.90248896289457e-17	0.664338872114633
CAGTAAAGATATGACGGTGT	4262525	-	TRUE	dnaB	TRUE	4262337	4263752	+	-8.58691433028783	7.54342260157123e-08	0.664402115102902
CTGGGAAGCGTGACCTTCAA	3341712	-	TRUE	lptA	TRUE	3341402	3341959	+	-8.58215382096891	3.62961371088078e-11	0.66452575177879
AACCGGTTCAGTCTGGAAAC	2635580	+	TRUE	bamB	FALSE	2635496	2636674	-	-8.57204941956332	1.38802833371045e-10	0.664788328892972
CAGCAACAGCATCGGGAACC	3324643	+	TRUE	ftsH	TRUE	3323023	3324957	-	-8.56854555727704	1.4184860177457e-10	0.664879430154432
CGGCCTGACCGTTACGGATA	3444531	+	TRUE	rpsH	TRUE	3444175	3444567	-	-8.55888535499386	3.34887298967513e-11	0.665130727098724
CCATTTCCGGTTTGTTCGGA	706419	-	TRUE	glnS	TRUE	705316	706980	+	-8.5546175546323	1.54502044391669e-10	0.665241808595112
CCTGACGTGGTGCTCGGTAT	99950	+	FALSE	murG	TRUE	99644	100711	+	-8.54557881665294	1.32130325324232e-13	0.6654771896935
TGGATTCTATCTCTTCCGGG	673991	+	TRUE	leuS	TRUE	671424	674006	-	-8.54151689037763	1.68981586463221e-10	0.665583022064147
CTTAGACAGCAGACCCGCAC	3721260	+	TRUE	glyS	TRUE	3720351	3722420	-	-8.53814109829301	2.20842171941015e-10	0.665671003013461
CGTTGCAGCGTCAATTTGTC	3313870	+	TRUE	infB	TRUE	3311364	3314036	-	-8.53599238485078	5.94068519073356e-17	0.665727015570589
ACGACCGCGCGCGCCACGAG	2335613	+	TRUE	gyrA	TRUE	2334815	2337442	-	-8.53510798684438	3.94217053257125e-11	0.665750072753103
CTTGCGCGGCAGTACGATCC	1947406	+	TRUE	aspS	TRUE	1946774	1948546	-	-8.53235894307538	7.61755670165514e-19	0.665821753403266
GGAGCCAGGGTGTAGTAATC	1155204	-	TRUE	holB	TRUE	1154985	1155989	+	-8.52812222699682	1.88938710102239e-10	0.665932254978862
CGTATTGGCCGCATCCTGAC	2745143	+	TRUE	ffh	TRUE	2744456	2745817	-	-8.52732641961637	3.19718495977773e-29	0.665953015233762
ATAACTGCGTAATCGTATTC	95097	-	TRUE	murF	TRUE	94650	96008	+	-8.52721627220228	1.81888142739887e-10	0.665955888755174
CACGGCTGGCACCCAGCGAC	386722	-	TRUE	tauC	FALSE	386195	387022	+	-8.51412759344722	2.08524216072107e-10	0.666297522332925
AGCTCTTTCAGCATTGCTTT	3876338	+	TRUE	gyrB	TRUE	3875728	3878142	-	-8.51085269918054	2.14156496147479e-10	0.666383056672429
CGTAGTCGTTACGATAAACA	1796393	+	TRUE	pheS	TRUE	1795983	1796966	-	-8.50805295156301	2.22411497913775e-10	0.666456198451569
CGTCCCAGCCGATCGGCTGC	673787	+	TRUE	leuS	TRUE	671424	674006	-	-8.50488566222397	4.81150385509004e-11	0.66653896140296
CGTTTGAGCAGCTCTTTAAT	438740	+	TRUE	dxs	TRUE	437539	439401	-	-8.49332349197736	5.1408657047919e-11	0.666841261609136
GCTGTTTACCGATTTTACGG	1799865	+	TRUE	thrS	TRUE	1798666	1800594	-	-8.47184642624895	1.54798982508371e-14	0.667403521343524
AATGCCGATGGTAGAAAGCC	1174729	-	TRUE	lolC	TRUE	1174650	1175849	+	-8.4712020546468	2.76522258984201e-10	0.667420405347483
AACGATGCTCAAGCACGAAC	4423623	-	TRUE	priB	FALSE	4423543	4423857	+	-8.46500816473663	6.73896835480624e-09	0.667582742955536
GTCGTACAGCCCCGGTACGT	2343962	-	TRUE	nrdA	TRUE	2342887	2345172	+	-8.46385706240979	1.99293867850775e-16	0.667612921260688
CAAGTCATGTGCCAGACACT	4254316	+	TRUE	plsB	TRUE	4252066	4254489	-	-8.46165507971403	3.06228660179722e-10	0.667670657966942
CATTTTTTCCTGGTCAGCTT	3470265	+	TRUE	fusA	TRUE	3469422	3471536	-	-8.45805820208983	9.26653893106308e-12	0.66776499075662
GGAGGGTGCAGTTCTTTGCG	200430	-	NA	NA	NA	NA	NA	NA	-8.45384847698199	1.44196611241803e-14	0.667875430128892
TTCCAGGATTTGCCGGTTGT	2518721	-	NA	NA	NA	NA	NA	NA	-8.45236088875525	6.84253526206607e-11	0.66791446476427
GCCGTAAGGACGATCGTCCA	2743218	+	TRUE	trmD	TRUE	2742594	2743361	-	-8.45099967779076	1.42724246320063e-14	0.667950187231139
CTTCGCTGTCAACGGCTACA	988172	+	TRUE	asnS	TRUE	986808	988208	-	-8.44925583947482	1.73885824044157e-14	0.667995956629544
ATCGGTAGCGGTATCACCAA	105503	+	FALSE	ftsZ	TRUE	105305	106456	+	-8.44858192942454	3.28046727705912e-10	0.66801364599196
GCAGTTGGTAGTACGAATTC	103138	+	FALSE	ddlB	FALSE	102233	103153	+	-8.44642856693556	7.78087668415383e-06	0.668070175556556
AAATCCCCATATCGAGGGCG	3446247	+	NA	NA	NA	NA	NA	NA	-8.44197205789092	7.46780090512089e-11	0.668187197176305
CTGGTGCGAGGATGATGTTG	49741	-	NA	NA	NA	NA	NA	NA	-8.43718501703582	7.56447613495588e-11	0.668312943771677
CGACATAAGCCACATTTTCC	3340642	-	TRUE	kdsC	FALSE	3340295	3340861	+	-8.42410026358305	2.73539950245206e-21	0.668656897343598
ATAACCTTCAGTGCGGAGTT	877172	+	TRUE	rimO	FALSE	875933	877258	-	-8.41996733322414	4.13859090679562e-10	0.668765611582075
TAAAGCAGTAGATGTTTTCC	3877356	+	TRUE	gyrB	TRUE	3875728	3878142	-	-8.41296135194747	4.35106049152432e-10	0.668949980467241
TGGATATCGCCGGTACCGCC	4482556	-	FALSE	pepA	FALSE	4482463	4483974	-	-8.41296052032741	5.42708847425579e-28	0.668950002358126
ACCTTCGATGACGATACGAT	3333887	+	TRUE	murA	TRUE	3333257	3334516	-	-8.41268377787951	2.96113100346203e-21	0.66895728717947
CGTTCAACGATAGCATCAAC	672244	+	TRUE	leuS	TRUE	671424	674006	-	-8.41108488924074	1.30057120558625e-10	0.668999378582137
GCTGATCTGCACGTCTACAC	3451011	+	TRUE	rpsJ	TRUE	3450981	3451292	-	-8.40094243581816	6.4898254550043e-55	0.669266506270575
CTGGGTTAAATGTCCGGAAT	4484809	-	TRUE	lptF	TRUE	4484241	4485341	+	-8.39651160660853	4.72431925015633e-10	0.669383270558164
CGGTGTTGAAGGTCTGACGA	671855	+	TRUE	leuS	TRUE	671424	674006	-	-8.39622654806454	4.9097544776895e-10	0.669390784013761
TTTGCGTAGGCGGGTTTTGT	3976886	-	TRUE	rffT	TRUE	3976624	3977976	+	-8.39609211398673	1.20275016298619e-14	0.669394327430296
TCTGATCCGAACTTCGGATC	3472063	+	TRUE	rpsG	TRUE	3471564	3472103	-	-8.38901384612965	5.20157907952577e-10	0.669580949580344
AACGTTCACACGTAATTTAA	198928	-	TRUE	bamA	TRUE	197928	200360	+	-8.38706281186946	5.2665755559695e-10	0.669632407891307
CGGTGTAACCGACGTTTTCC	2819802	+	TRUE	alaS	TRUE	2817403	2820033	-	-8.38115412332436	1.09897601946188e-10	0.669788297151453
GTCCTGGGTCATGACAACCG	201140	-	TRUE	lpxD	TRUE	200971	201996	+	-8.37856740318775	5.55570066831272e-10	0.669856565578428
TGGGATCAGGATCGGGAGTC	2339410	+	TRUE	yfaL	FALSE	2338439	2342191	-	-8.37010947916128	1.18939467568072e-10	0.670079883335293
GGCGGCCTTCGATCTTCGTT	1798179	+	TRUE	infC	TRUE	1798120	1798662	-	-8.37002904732705	4.71180443225046e-25	0.670082007722064
CGCGCTAGCCTCCTGGATTC	1797253	+	TRUE	pheM	FALSE	1797250	1797294	-	-8.3684397598521	1.17683401068797e-10	0.670123987163928
CTTTACGGAAGGTCGTTACC	3720515	-	FALSE	glyS	TRUE	3720351	3722420	-	-8.36267752983772	2.53890988273743e-27	0.670276234833664
ATGACCTGTCTGCGCGAGCT	3723193	-	FALSE	glyQ	TRUE	3722430	3723341	-	-8.36121499855608	6.91248755521245e-21	0.670314888343003
ACGACCATTATGGACAGCGA	3448405	+	TRUE	rpsS	TRUE	3448270	3448548	-	-8.36076781055874	1.31626733559918e-06	0.670326708047151
TGCTGAGCTTTCAGCATGAT	2192493	-	TRUE	metG	TRUE	2192322	2194355	+	-8.35645832826965	4.64714242767147e-06	0.670440634094663
CCCCCGGAGATGAGTTCACG	226595	-	TRUE	rrlH	FALSE	225759	228662	+	-8.35638147218733	1.29655750568538e-10	0.670442666223759
CTGTCGCACACGCCATTCAA	192179	-	TRUE	pyrH	TRUE	191855	192580	+	-8.34763685894213	1.37197752960659e-10	0.670673960440724
TCGTCTTGTAAGATTTCTGT	3342626	-	TRUE	lptB	TRUE	3341966	3342691	+	-8.32270650722424	5.19729913065019e-14	0.671334242852363
GCCGTACCAGTGAAGCGCCA	2964000	+	TRUE	lgt	TRUE	2963184	2964059	-	-8.31784734016629	4.25787626088936e-11	0.67146308971655
CCGGGAAACCACGTAAGCTC	4368665	+	NA	NA	NA	NA	NA	NA	-8.31753687041465	6.74840261657279e-07	0.671471323889557
ATCCACTGCACGGGTCAGGC	3215716	+	TRUE	aer	FALSE	3215578	3217098	-	-8.31584311921956	3.80536787942925e-07	0.671516248538203
CTTTCAGGCCTTTAGGGGCC	3449074	+	TRUE	rplB	TRUE	3448565	3449386	-	-8.31054657833181	8.98548733100095e-10	0.671656771511746
CACGTTGTTCAGGGATCGAC	3431984	-	TRUE	def	TRUE	3431712	3432221	+	-8.30975295833445	1.97590683759057e-10	0.671677832177415
ACGCCGCAACGGCGACAATC	1175465	-	TRUE	lolC	TRUE	1174650	1175849	+	-8.30961532726469	2.36283306609791e-10	0.671681484691978
ACCGGCATAGAGTATTTGCC	2905542	+	TRUE	eno	TRUE	2904665	2905963	-	-8.30796325208421	9.02748315073163e-10	0.671725331298637
GGCAAACCGCCGCTACTTTT	438467	+	TRUE	dxs	TRUE	437539	439401	-	-8.30707296303134	1.80215720066536e-10	0.67174896223019
TACCCTCACCAATTTCGACA	202661	-	TRUE	lpxA	TRUE	202560	203348	+	-8.29068890719342	1.95148307693223e-10	0.672184141064054
TCGTAGGCTGGCAGCGGCAG	3722626	+	TRUE	glyQ	TRUE	3722430	3723341	-	-8.28114198829107	2.52745355392159e-10	0.672437977994567
AGTACCTTCACGTACCAGAA	3312288	+	TRUE	infB	TRUE	3311364	3314036	-	-8.27568699706192	2.75883764642936e-10	0.672583103358421
TGCCCGGAACCTGTTCGCTC	4423179	-	TRUE	rpsF	FALSE	4423141	4423536	+	-8.27437300509281	1.47977028724145e-15	0.67261807035033
TTCCGCACGGGTCATGGAGA	3404480	-	TRUE	accC	TRUE	3403939	3405288	+	-8.27401990280975	2.21993320011767e-10	0.672627467469474
CCTTTATCGTCGGCTCCCAG	2282648	+	FALSE	yejM	TRUE	2282398	2284158	+	-8.26970054054141	9.46056780366704e-14	0.672742440011352
TCGGAGAGGAAGCCGTAACC	3404176	-	TRUE	accC	TRUE	3403939	3405288	+	-8.26937465590924	1.22285166691936e-09	0.672751115984762
CCGCAGCGGGTCTTTGAGCC	1260144	+	NA	NA	NA	NA	NA	NA	-8.26904541842644	6.8364380559636e-14	0.672759881447814
ACGTGGATTTTCCTACGTTA	2635348	+	TRUE	der	TRUE	2633906	2635378	-	-8.26815955970077	1.15610867229848e-09	0.672783467265762
ATTAGCGGTATAGAAGTTGT	3883910	-	TRUE	yidC	TRUE	3883099	3884745	+	-8.26532769987983	2.48322258266971e-05	0.672858876082611
AGGTGCGAATAATAGCACAA	2964159	+	NA	NA	NA	NA	NA	NA	-8.26120444264318	1.25445054012590e-09	0.67296870339652
GTACAACCCATAAAGGTGTC	673258	+	TRUE	leuS	TRUE	671424	674006	-	-8.25301767642804	2.78443159064723e-10	0.673186872865033
TATCAGCACCTGAAGCCACC	2637601	+	TRUE	hisS	TRUE	2637323	2638597	-	-8.2515449459714	4.52615016724328e-10	0.673226134732487
AAGCAGATGTGCGGGGTGAA	671719	+	TRUE	leuS	TRUE	671424	674006	-	-8.25140795172678	3.41505493930756e-10	0.673229787127077
GTCGCCAACGCTCAGAACCA	962692	-	TRUE	rpsA	TRUE	961218	962891	+	-8.24463019651292	3.99755981314767e-20	0.673410537911078
CCAACCGGGATGTTGCGCAT	3448995	+	TRUE	rplB	TRUE	3448565	3449386	-	-8.24407692283338	2.63162888372766e-20	0.673425297029713
AATTTCTGCTTTACGGAACA	1959491	-	TRUE	argS	TRUE	1958086	1959819	+	-8.24328877312618	1.47356458917074e-09	0.673446322814247
ACAAAAGGCAATATTCGCAT	4164196	-	TRUE	murI	TRUE	4163451	4164308	+	-8.241616621782	1.45824839684143e-09	0.673490935811537
TGCCAGTAACTTGGCAGACT	3809691	+	TRUE	rpmB	TRUE	3809461	3809697	-	-8.23134249594279	2.96776136494388e-10	0.673765179269934
CAGACGCTCAGCCTGGTCAA	3722118	+	TRUE	glyS	TRUE	3720351	3722420	-	-8.22804879859696	1.61033251428201e-09	0.673853144003172
TCCAGTTCAATTTTGGACGG	3819823	-	TRUE	gmk	TRUE	3819451	3820074	+	-8.21759394196108	2.03288859904086e-10	0.674132513955373
CGGTTCTTCCGCCAGTAGTG	3334424	+	TRUE	murA	TRUE	3333257	3334516	-	-8.20728485652275	1.37516033311231e-08	0.674408215591732
AGATTAGTAACTGGACTGCT	2817001	+	TRUE	csrA	TRUE	2816983	2817168	-	-8.20693152517437	1.88498697453584e-09	0.674417668926579
CAGTCATGTTGTTCTTCCTC	102217	-	TRUE	murC	TRUE	100765	102240	+	-8.20682474213613	9.67254046109647e-20	0.674420525945203
TGCCGCCATAAAGGAACAAC	3881254	+	TRUE	dnaA	TRUE	3880349	3881752	-	-8.20589736831873	1.89954484368624e-09	0.674445339183491
CAGTGCAGAGATACCGTCGC	3307697	+	TRUE	pnp	FALSE	3307055	3309190	-	-8.2026744976759	2.13878894347364e-26	0.674531585985753
TCAGAAGCAAGGGGCCTGGC	2338948	-	FALSE	yfaL	FALSE	2338439	2342191	-	-8.20209977987073	3.59444858499196e-10	0.674546968248183
GTTAGCTGAATTTACAAGAT	191749	-	NA	NA	NA	NA	NA	NA	-8.20022803562152	1.95955032723532e-09	0.674597070152295
TTCGCAACTGCCGCCAGGAC	652741	+	FALSE	dpiB	FALSE	651458	653116	+	-8.18770135400981	1.54760270644379e-32	0.674932569711989
TTGGTGCTTCAACCCAGTTC	553704	+	NA	NA	NA	NA	NA	NA	-8.18723646010863	3.05460026619045e-11	0.67494502729287
TGCTTCCGACAACGCGACTG	106180	+	FALSE	ftsZ	TRUE	105305	106456	+	-8.17949352492357	8.67075570086622e-20	0.675152579346872
TCATGCTCCTGAGCGTTAGC	2529032	+	TRUE	zipA	TRUE	2528269	2529255	-	-8.17708971352549	1.57924850691133e-13	0.675217040310555
AAACATATGGTTGAGTGAGT	3210735	-	TRUE	dnaG	TRUE	3209129	3210874	+	-8.16972691828958	2.4137966676839e-09	0.675414558735119
GAGCAAAATACCCATGGTGC	4263229	-	TRUE	dnaB	TRUE	4262337	4263752	+	-8.1636241410031	7.80240078987678e-20	0.675578362828079
GGTGGTGGAAACCATCACGC	300568	-	FALSE	paoB	FALSE	300155	301111	-	-8.15926163177952	2.62260553011148e-09	0.675695505249913
TTTATCGCCAACCTGACCGC	2818528	+	TRUE	alaS	TRUE	2817403	2820033	-	-8.15467001492811	3.68140197437768e-13	0.675818843575022
AAAAGCCAGGAGTCTTCGGC	1214265	+	TRUE	bluF	FALSE	1213487	1214698	-	-8.15305117593629	4.96805019491908e-10	0.675862338969984
ACCGCTGGCAATCGCCTGGT	491977	-	TRUE	dnaX	TRUE	491316	493247	+	-8.1431784680489	1.0907322364989e-19	0.676127722738119
GAAAACATCCGTCATTTTAA	1177216	-	TRUE	lolE	TRUE	1176543	1177787	+	-8.1393493594239	2.94503871160326e-09	0.676230707364241
TACGGTCACGAGTCAGACCC	2635279	+	TRUE	der	TRUE	2633906	2635378	-	-8.13703770776661	9.21557004898971e-05	0.676292894876292
ACCGATGATTTTTACGATTT	2905958	+	TRUE	eno	TRUE	2904665	2905963	-	-8.12909447317905	3.24665176212817e-09	0.676506669117924
GAAATCAGTTAGTTGATGAA	2282123	-	NA	NA	NA	NA	NA	NA	-8.12646211924	3.35636503783759e-09	0.676577542804271
CAGAGCATCAACGGTTTTCT	3451053	+	TRUE	rpsJ	TRUE	3450981	3451292	-	-8.12636238561124	3.27371702679432e-09	0.676580228331625
CCGATGTAGCGACGCAGTTC	3404686	-	TRUE	accC	TRUE	3403939	3405288	+	-8.10498327547866	7.79250096613246e-10	0.677156396140872
CACTTGCTCAATGCTTAAGG	961037	-	TRUE	cmk	FALSE	960424	961107	+	-8.09371186277429	7.97937705056704e-10	0.67746055637225
CTTCGACCACTTTCTGGTGG	3404640	-	TRUE	accC	TRUE	3403939	3405288	+	-8.09298828240166	7.28607510296749e-10	0.677480091596844
CCGCCACCTTGCCGACATCC	25114	-	TRUE	ileS	TRUE	22391	25207	+	-8.09064866781204	1.00461703858131e-122	0.677543264228507
CATGCGGACGACCTGTTTGA	3444714	+	TRUE	rpsN	TRUE	3444601	3444906	-	-8.0881517204862	4.04361889743149e-23	0.677610698045896
TTCGTTTTAATGGCCGATCG	2529147	+	TRUE	zipA	TRUE	2528269	2529255	-	-8.0880997276032	7.59850380678989e-10	0.677612102334548
ATAATCTTTGTCGAACAGGT	4163418	-	TRUE	btuB	FALSE	4161662	4163506	+	-8.0825252632449	4.31304305031789e-09	0.67776269819655
GGCGAGGCAGGCAGAAACGC	2439208	+	TRUE	fabB	TRUE	2438407	2439627	-	-8.08150764687083	4.13975440355863e-09	0.67779019663999
ATTGCATCACGCATGAACTC	3440957	+	TRUE	secY	TRUE	3440788	3442119	-	-8.07629325028165	8.90359805215762e-20	0.677931137203026
TCGGATTGGGTGCGTACGCT	2283490	-	TRUE	yejM	TRUE	2282398	2284158	+	-8.07590804246065	3.22709530572272e-19	0.677941551357349
TACAACGCGAACCAGCGTCC	3446375	+	TRUE	rpsQ	FALSE	3446336	3446590	-	-8.06462521429731	2.29894742979893e-25	0.678246726398402
CATGACGGCCATAGAAACTA	3807732	-	TRUE	waaA	TRUE	3806563	3807840	+	-8.0636233646487	5.11168773740007e-09	0.678273837452324
CATTGACCAGGCAGAATTGA	104194	+	FALSE	ftsA	TRUE	103982	105244	+	-8.06023827814844	5.23262289869695e-09	0.678365457315837
GTGCGCACATACACCAAAGT	4186041	-	TRUE	rpoC	TRUE	4183373	4187596	+	-8.05474633141889	4.74055154438296e-13	0.678514153571048
GCCGCGCAATCCTAACAGAC	1147718	-	TRUE	plsX	FALSE	1146844	1147914	+	-8.05326130726119	3.70532144591493e-06	0.678554372283376
GTTGCACGAACCACGTTGAT	3442854	+	TRUE	rpsE	TRUE	3442748	3443251	-	-8.04955584496514	2.15655926632257e-68	0.67865474762168
ATCACCGCACGACCGTAAAA	101428	-	TRUE	murC	TRUE	100765	102240	+	-8.04371933350105	5.93783963171326e-09	0.678812910079976
GTTACGCGCATCGAGGTTAC	1176359	-	TRUE	lolD	TRUE	1175842	1176543	+	-8.04307689296303	1.83980990368349e-11	0.678830323951803
TTTACCTTCTTCAAAACCAC	705803	-	TRUE	glnS	TRUE	705316	706980	+	-8.04080126738811	6.07225439206881e-09	0.678892013816665
GCACACGCCGCACGGCGTCG	491521	-	TRUE	dnaX	TRUE	491316	493247	+	-8.04069889740924	1.28118339344992e-09	0.678894789224867
ACCCATAAAGGTGTCCGGGC	673263	+	TRUE	leuS	TRUE	671424	674006	-	-8.03634583606878	6.30324143179229e-09	0.679012828441954
CAGATAGCAGCCGCCCGCGC	610185	+	TRUE	fepA	FALSE	609477	611717	-	-8.03371458002066	1.16191964387296e-09	0.679084198458013
GATAAACCTTCGCCAGGGTT	2688880	+	TRUE	glrK	FALSE	2687693	2689120	-	-8.0315248654965	1.36312711042087e-06	0.679143603569786
CTGAATAATACGCCGACTGT	690201	+	TRUE	ybeX	FALSE	690129	691007	-	-8.0243524291186	7.09306559181507e-19	0.679338258528465
ACGGTGGCAGCTACCAAACT	1799527	+	TRUE	thrS	TRUE	1798666	1800594	-	-8.02304288161212	6.68170093691791e-09	0.679373810788305
GATTTCGGAATAAACGGCTC	3511137	+	TRUE	trpS	TRUE	3510656	3511660	-	-8.02221313383622	6.71301313336873e-09	0.679396339127645
ACGGCCAAACATATGCCCAA	3161393	+	TRUE	plsC	TRUE	3160766	3161503	-	-8.02200820798953	1.15610867229848e-09	0.679401903264179
GCAGCTGTTTGAACAACTGC	1947967	+	TRUE	aspS	TRUE	1946774	1948546	-	-8.01873749183611	7.0334939738358e-09	0.679490721925808
TACCATCGCCAGATACATAA	1177351	-	TRUE	lolE	TRUE	1176543	1177787	+	-8.01727257970086	6.78109132301896e-09	0.679530510204133
TTTTACCGGCCCAAAGATAC	4183548	-	TRUE	rpoC	TRUE	4183373	4187596	+	-8.0164199587065	6.9420412629467e-09	0.679553670271811
CACCGAAACGCTTAACGCCC	3331081	+	TRUE	rpmA	TRUE	3330884	3331141	-	-8.0150914547364	3.26955401999037e-10	0.67958976007586
CATCAGAGGCTGCTTGATAA	1417980	+	TRUE	racR	TRUE	1417789	1418265	-	-8.01237720638317	1.02859216315607e-08	0.679663506580318
CGCGTCACAGTTCTGTTGAA	4173123	+	NA	NA	NA	NA	NA	NA	-8.00445411135818	1.25842031498351e-09	0.679878869752162
TTTGATACCAGGACCTTCCA	3723310	-	FALSE	glyQ	TRUE	3722430	3723341	-	-8.00355315416762	7.7062411029798e-09	0.679903367940585
CTCAAAGAGGCGCAGAGTGT	1143730	+	FALSE	yceQ	TRUE	1143725	1144045	+	-8.00086606694992	1.32989857605625e-09	0.679976443795012
CAGAATTTCCGGATACTGAT	3721815	+	TRUE	glyS	TRUE	3720351	3722420	-	-7.99719287793616	8.24683875124403e-09	0.680076362294468
CATGTCCTGAACAAAGCGCT	3881144	+	TRUE	dnaA	TRUE	3880349	3881752	-	-7.99277581480382	8.32798469974331e-09	0.68019655463522
CGTCGTCGGCAGCAACAACC	3312638	+	TRUE	infB	TRUE	3311364	3314036	-	-7.99222801983308	9.60219513411541e-15	0.680211463600177
CTGTGCTTATCGAATTAAAT	938621	-	NA	NA	NA	NA	NA	NA	-7.97809308305844	9.42425743923017e-09	0.68059639074411
CTTCGGTTGGATAGGTAATT	106543	+	NA	NA	NA	NA	NA	NA	-7.97600508657269	1.55874130795406e-09	0.680653288669425
CGGTGCAGTTTCAGAGAACT	3069862	+	TRUE	pgk	TRUE	3069481	3070644	-	-7.97489453137081	1.25206862434398e-06	0.680683555185645
TGTTGCTGAGTAGATTCCTC	103935	-	TRUE	ftsQ	TRUE	103155	103985	+	-7.97138639244206	1.59230866266969e-09	0.680779181933819
CGTCTTGGTGGAGGTAGAGT	1329214	-	TRUE	topA	TRUE	1329072	1331669	+	-7.96640062391584	2.38445903138153e-09	0.680915132945329
CAAAGTTATGCACTTGCAAG	2342753	+	TRUE	ypaB	FALSE	2342616	2342759	-	-7.96483608775675	1.62113038242428e-09	0.680957805620728
AAAGTGCATAGCGTCGCAAT	243706	-	TRUE	lpcA	FALSE	243543	244121	+	-7.96483296999333	7.74927241247328e-13	0.680957890662969
CGTAGGTCGGCAGAGTTGCC	4178393	-	TRUE	rplJ	TRUE	4178019	4178516	+	-7.96423137868567	1.66990385619043e-09	0.680974300475139
CACTGTCTGCCAGGCCAAAC	24772	-	TRUE	ileS	TRUE	22391	25207	+	-7.96398030400932	2.24207237784672e-08	0.680981149359012
ACTGGATAATATTGCGCACA	2721585	-	TRUE	pssA	TRUE	2720749	2722104	+	-7.96239687196961	2.50615315076062e-09	0.681024345826717
CTGGTAGTAGGACTGGAGAT	104027	+	FALSE	ftsA	TRUE	103982	105244	+	-7.95581132638892	1.0119165475586e-08	0.681204060155069
CCAAACAATCCCCAACGACG	3525280	-	TRUE	yrfF	TRUE	3524491	3526626	+	-7.94115382404577	1.02672650055331e-08	0.681604392480443
TACATAACCACGGTTTTCAT	2819128	+	TRUE	alaS	TRUE	2817403	2820033	-	-7.94006397950324	1.16124326749233e-12	0.681634177601601
ACCAGGTAGTCAAACTGCTT	3211855	-	TRUE	rpoD	TRUE	3211069	3212910	+	-7.93629987496059	2.02380742035242e-09	0.681737069462751
AGAAATCTGACAACAATGCC	2283462	-	TRUE	yejM	TRUE	2282398	2284158	+	-7.93191993158665	1.18193963807567e-08	0.681856834397355
CATAGGTATCCCCCCATTTA	988254	-	NA	NA	NA	NA	NA	NA	-7.93072575233466	1.26674865796191e-08	0.681889495271032
AGCGTCTCTTTTCTGGAATT	3320095	+	TRUE	leuU	FALSE	3320094	3320180	-	-7.92862350736527	1.28884491588645e-12	0.681946999399196
GCCGTTCAACTGGCCAGATA	987582	+	TRUE	asnS	TRUE	986808	988208	-	-7.92534159786521	2.1656016197435e-09	0.682036791080769
GAATAGACTTGCTTTTTACC	4254435	+	TRUE	plsB	TRUE	4252066	4254489	-	-7.92316182224455	2.22161463227771e-09	0.682096441905981
GCGTTCACGCTCCCAGTCGA	4481456	+	TRUE	valS	TRUE	4479005	4481860	-	-7.92123419229645	3.43106944063481e-11	0.682149201312629
GTACCGCTTTTACCATTCAC	101776	-	TRUE	murC	TRUE	100765	102240	+	-7.91992996733798	5.41307086535079e-25	0.682184902697621
TATGTTGTGACCTCGGTTCC	4272050	-	NA	NA	NA	NA	NA	NA	-7.91504822370175	2.57961335173379e-18	0.682318566970617
GTACCGGTTTCGATACGATC	3333828	+	TRUE	murA	TRUE	3333257	3334516	-	-7.91093463031893	2.95806313031698e-36	0.682431239625567
CTTGCAAGTGCATAACTTTG	2342729	-	FALSE	ypaB	FALSE	2342616	2342759	-	-7.90633071138903	1.50427784775364e-12	0.682557386593535
CTTCATAAAGACCGTAAAGC	3209857	-	TRUE	dnaG	TRUE	3209129	3210874	+	-7.90364521680131	1.5733259564069e-08	0.682630990443556
AAGTCATCAGCACGCGGAAC	2193770	-	TRUE	metG	TRUE	2192322	2194355	+	-7.90121406473293	1.67856269531576e-09	0.682697636982959
TCTCCCAGATGGTCAGTTGG	2282453	+	FALSE	yejM	TRUE	2282398	2284158	+	-7.89638757301176	1.96107933729741e-12	0.682829986886466
TCAAAGCGGTTGAACGTTGT	104517	+	FALSE	ftsA	TRUE	103982	105244	+	-7.87881867083992	6.16820486639129e-05	0.683312187162867
GTGACGCTTCCAGACCTGCG	102907	-	TRUE	ddlB	FALSE	102233	103153	+	-7.86720271044939	4.45020095302327e-20	0.683631375750055
CCGCTTTGGCGGTGTACTGA	24589	-	TRUE	ileS	TRUE	22391	25207	+	-7.86189559277041	2.06169292221524e-08	0.683777306383003
TTCCCGCTACAGTGATGAAC	2282183	+	FALSE	yejL	FALSE	2282151	2282378	+	-7.85711366884	3.34980655519551e-09	0.683908849051553
AAAGGTAAGCGTCCACTGAT	94360	+	FALSE	murE	TRUE	93166	94653	+	-7.85475307732595	2.05486565773037e-08	0.683973803606541
TCCTCTTCGGGGGAGACGGG	3268559	-	FALSE	rnpB	FALSE	3268238	3268614	-	-7.85068685942587	4.37169344599585e-09	0.684085719487946
AAGCGTCATGACGCTGCTTT	3820026	-	TRUE	gmk	TRUE	3819451	3820074	+	-7.84846719623182	3.48619608630544e-12	0.684146827478275
GCAGCGCCTTCAATCAGTCC	3329133	+	TRUE	obgE	TRUE	3328604	3329776	-	-7.84216786604837	8.14454471225071e-09	0.684320309389495
CATTATTCCGGCGGCATTCG	724471	-	FALSE	kdpB	FALSE	724211	726259	-	-7.83886242859609	1.47183663707684e-12	0.684411375475413
ACCCAGTTCGGGTCATATAT	553715	+	NA	NA	NA	NA	NA	NA	-7.83848273102993	2.46668435373846e-08	0.684421837842874
CCAACGGTGCGGTTAAATAC	706924	-	TRUE	glnS	TRUE	705316	706980	+	-7.83804054581417	2.47043552337064e-08	0.684434022427946
GTTGTTCTTTGGATAACTAC	3923979	+	NA	NA	NA	NA	NA	NA	-7.83540027779668	2.445427415863e-08	0.684506785066731
CAGCATCCCGGTTGGGCGTT	4598417	+	TRUE	dnaC	TRUE	4598261	4598998	-	-7.83471441026253	4.30660287329057e-35	0.684525689289788
GGTTCATAAACCAGTTTGTC	1130877	-	TRUE	flgC	FALSE	1130661	1131065	+	-7.83211808780179	2.03773312289251e-12	0.684597259882992
GACAAGATGGATACCCTGGC	3721033	-	FALSE	glyS	TRUE	3720351	3722420	-	-7.8233139099459	3.11104438773732e-12	0.684840068561057
CACCCCGAGGGTAATGCCGA	1174741	-	TRUE	lolC	TRUE	1174650	1175849	+	-7.82148098963973	4.12863285684897e-09	0.684890639970099
CAGGTTGTGCGGCGGGATGT	2336903	+	TRUE	gyrA	TRUE	2334815	2337442	-	-7.82142135232825	1.14192922284598e-07	0.684892285526002
CACAATGACCGAGCAGCCGG	988002	+	TRUE	asnS	TRUE	986808	988208	-	-7.82016884418187	2.68695966211132e-08	0.684926847465221
CCACCATCCAGCGGAACCAG	4184123	-	TRUE	rpoC	TRUE	4183373	4187596	+	-7.80943666605204	4.47314426285477e-09	0.685223136213404
TCCAGGAATGGTCACTTTAC	199714	-	TRUE	bamA	TRUE	197928	200360	+	-7.8059842384522	1.34585757584075e-23	0.685318503655582
CGGAGAAACCAGGAGTACCA	3323907	+	TRUE	ftsH	TRUE	3323023	3324957	-	-7.80139282396866	3.02162410498681e-08	0.685445374808579
CGAGATACCAGTCACAGAAC	4479730	+	TRUE	valS	TRUE	4479005	4481860	-	-7.79740548914932	2.52049972456474e-06	0.685555591992829
AGAGGGCGGATGCACGCGCG	208505	+	FALSE	dnaE	TRUE	205126	208608	+	-7.79571130323574	4.73389799649138e-12	0.685602433102275
CGTAATCAACGGTCAGATCC	3884067	-	TRUE	yidC	TRUE	3883099	3884745	+	-7.79246102124592	4.36954566534629e-12	0.685692315314395
GGCGGCAACGGCGGGAGCCA	3588587	+	TRUE	ugpA	FALSE	3588047	3588934	-	-7.79105990705759	3.34505012000402e-08	0.685731068527667
TGCACATCGTAGCGAACTAC	3510969	+	TRUE	trpS	TRUE	3510656	3511660	-	-7.78988204712219	1.5015135648721e-17	0.685763650173297
TCTTGATAACCTGCCCATCG	2743466	+	TRUE	rimM	FALSE	2743392	2743940	-	-7.78425897105544	1.36150754891904e-31	0.685919236877473
ATAGTGCTCTAAAAGTTGCC	3210627	-	TRUE	dnaG	TRUE	3209129	3210874	+	-7.78206619909899	3.32052978285533e-08	0.685979928526624
ATTAGCTCGAGCTTCGTATG	3809739	+	NA	NA	NA	NA	NA	NA	-7.7756422028692	3.28979351896163e-08	0.686157794046254
AGGGCCATCATGCAGAATGA	22539	-	TRUE	ileS	TRUE	22391	25207	+	-7.77415168697208	5.7473474111503e-09	0.686199076149992
TCATCGGCAGAATCGCCACC	217353	+	TRUE	proS	TRUE	217057	218775	-	-7.77329525204972	1.49122605870661e-15	0.686222798664357
CATGAACTTCACCGATTTTA	3471425	+	TRUE	fusA	TRUE	3469422	3471536	-	-7.77159665979488	3.16204706683568e-08	0.686269853068921
ACTTACTTCCAGCAGGTTGG	3722884	-	FALSE	glyQ	TRUE	3722430	3723341	-	-7.77072702980925	3.85333330713295e-08	0.686293946057461
GTGTCGTGGTCAGCGCGCGC	1796518	+	TRUE	pheS	TRUE	1795983	1796966	-	-7.76863224497472	5.36368922746141e-29	0.686351988751785
ACAGCGTGAAGCAGATGTGC	671711	+	TRUE	leuS	TRUE	671424	674006	-	-7.76686068316479	0.000897723864981677	0.686401083184342
GTCATGCAGCACCTGATCAT	438205	+	TRUE	dxs	TRUE	437539	439401	-	-7.76161234462502	7.77720843218347e-46	0.686546569076314
ACCGCCTCGATTTCACCATG	1176732	-	TRUE	lolE	TRUE	1176543	1177787	+	-7.75884569020537	2.30322859183668e-31	0.686623286590668
AAGCGTAAACCGTCGTCGAC	49760	-	NA	NA	NA	NA	NA	NA	-7.75597637863082	1.38409257546542e-17	0.686702868834302
TAAGGTGTTGCGTTTAAACC	49908	-	TRUE	folA	TRUE	49823	50302	+	-7.75578850388741	7.27117162645554e-09	0.686708080307379
GGCGTGCCGCTCAGATTGTT	92259	-	TRUE	ftsI	TRUE	91413	93179	+	-7.75422953444341	1.10444739663267e-25	0.686751327741627
TCCATCCCTTCTAACACCTC	2742811	+	TRUE	trmD	TRUE	2742594	2743361	-	-7.75132289056206	8.62458309746968e-71	0.686831975614616
GTGACGTTTAGCTTTCTCAC	961471	-	TRUE	rpsA	TRUE	961218	962891	+	-7.74880588245527	5.20958360627572e-44	0.686901827940374
ACCAGAGGACGGTCATAGCT	57003	+	TRUE	lptD	TRUE	54755	57109	-	-7.74805991853661	2.00943947947261e-17	0.686922532754448
TAAGGCGCGGGCAAAAGAGT	2282323	-	TRUE	yejL	FALSE	2282151	2282378	+	-7.74326943769756	4.60211320868804e-08	0.687055526061551
GTAATGGGCACCGTTGGTAA	93604	+	FALSE	murE	TRUE	93166	94653	+	-7.7405553127909	6.917697017795e-09	0.687130898440706
GCATTACCGCTTTTGACAGA	1150237	-	TRUE	fabG	TRUE	1149893	1150627	+	-7.73686467362425	7.07558775814081e-23	0.68723341556403
GGTTTCTACGATGACGTTAC	66116	+	TRUE	araD	FALSE	65855	66550	-	-7.7364869361756	9.83714340094184e-09	0.687243909932034
CGCCCTGGTAGGTATCCATG	101358	-	TRUE	murC	TRUE	100765	102240	+	-7.73220118527144	2.6750913558769e-16	0.687362999866096
CGAACGGACCATCATTAACA	4176167	-	TRUE	nusG	TRUE	4175766	4176311	+	-7.73107423364736	7.41449230486881e-09	0.687394321790963
CCTTTTCAATGGTAGACAAG	967454	-	TRUE	msbA	TRUE	965844	967592	+	-7.73074020296437	5.09808066425502e-08	0.687403606219691
TCCCTTCAGGGCGCAGAGTC	2638366	+	TRUE	hisS	TRUE	2637323	2638597	-	-7.72567650721098	2.51676982496613e-09	0.687544383064388
GAACAGATTCGATAGATGCC	1150078	-	TRUE	fabG	TRUE	1149893	1150627	+	-7.72473513529623	7.59159920460613e-09	0.687570560694555
AATGGTTTCGTGGATGTCAG	2343050	-	TRUE	nrdA	TRUE	2342887	2345172	+	-7.72189890080978	7.83887033447419e-09	0.687649442634164
TTCGTCAGATTTCGCAGTAG	3444990	+	TRUE	rplE	TRUE	3444921	3445460	-	-7.72187822328512	6.98335344354223e-12	0.687650017788211
CCCTGGAGTACGTCGGCTAC	988195	+	TRUE	asnS	TRUE	986808	988208	-	-7.72134070033567	3.61060094276943e-24	0.687664969552771
GTCTCGCCGGTAACCGCCAG	3877685	+	TRUE	gyrB	TRUE	3875728	3878142	-	-7.71590210127672	1.56380684158716e-06	0.687816286467725
GTTAGCGTCAAAGCCCATGT	3084969	-	TRUE	metK	TRUE	3084728	3085882	+	-7.71381735899601	6.00901978136874e-18	0.68787430743927
CGCGACGGTTGCCCAGAACC	4309249	-	FALSE	alsB	FALSE	4309130	4310065	-	-7.7097979214504	1.48019046071447e-28	0.687986201022001
CGTCCGGTCAAAATTTTATG	439151	+	TRUE	dxs	TRUE	437539	439401	-	-7.70549579909199	5.7202110475502e-08	0.68810600435814
ATTAACGGTAGCGTTTTATG	938539	-	TRUE	rarA	FALSE	937217	938560	+	-7.69964081355093	5.90102359623055e-08	0.688269118094758
CGCCCGCCTGGGAGAGGTAG	56281	+	TRUE	lptD	TRUE	54755	57109	-	-7.69682167434108	6.12928506657179e-08	0.688347683931421
TGGCGGCCTTCGATCTTCGT	1798178	+	TRUE	infC	TRUE	1798120	1798662	-	-7.69337538765142	7.56403178014502e-37	0.688443751942527
CCGATCCGTTATCGCGAGTA	1721940	+	FALSE	ydhK	FALSE	1720145	1722157	+	-7.67862065331852	1.23055257447255e-08	0.688855355362579
TTCGTCATCACGAATCAGGC	4480229	+	TRUE	valS	TRUE	4479005	4481860	-	-7.67540051862406	1.74352664185854e-22	0.688945250844826
CAGCCTAACTGTGCATGTTC	3511404	+	TRUE	trpS	TRUE	3510656	3511660	-	-7.6746961252521	4.08211459600475e-28	0.688964918299528
TGAAAATTTGTACGTGACCC	1799592	+	TRUE	thrS	TRUE	1798666	1800594	-	-7.67215150378679	7.28860162900262e-08	0.689035976347291
GTTATTGACCTCTTGTAGGA	3324850	+	TRUE	ftsH	TRUE	3323023	3324957	-	-7.66541170437336	7.75943444084104e-08	0.689224254748028
GAATCAGGAACGGGGCCGGG	1142990	+	TRUE	rne	TRUE	1140405	1143590	-	-7.66450894596186	1.13176453377263e-08	0.689249481400411
TGCTGGTTGCTCGGTCGGTT	1141827	+	TRUE	rne	TRUE	1140405	1143590	-	-7.66430768044405	1.37784232980456e-33	0.689255105809397
GGCGCAAAAATCATCTGCTA	3399206	+	NA	NA	NA	NA	NA	NA	-7.66326732334503	7.68648973100498e-08	0.689284180280065
ATTCAGCGGCTGACTGCCCA	90486	-	TRUE	rsmH	FALSE	90094	91035	+	-7.65559857644201	3.44241820611477e-09	0.689498571583786
TTCTGTCACCGTCTACGCAG	4177872	-	NA	NA	NA	NA	NA	NA	-7.65558542530401	1.41834969653146e-89	0.689498939358094
TACTGTATCCCTGTGGTCGC	938605	+	NA	NA	NA	NA	NA	NA	-7.65507289532475	1.53779149826367e-16	0.689513272671104
TAAACGGATACAGCTTGTCC	4244109	+	TRUE	malE	FALSE	4243252	4244442	-	-7.65197544174119	1.2127748589844e-08	0.689599908136176
CACAAGAGTTGGTAGTACCC	12186	-	TRUE	dnaK	FALSE	12163	14079	+	-7.65056823722649	8.7553258812475e-09	0.689639274697415
CTGCAGAAGGTTCGGTAAAC	1796222	+	TRUE	pheS	TRUE	1795983	1796966	-	-7.64240411575487	1.44781346094501e-08	0.689867754791474
CTCATAATCATAGAAGGTTC	102849	-	TRUE	ddlB	FALSE	102233	103153	+	-7.63949044554611	9.19746094684029e-08	0.689949333066381
TTTGTCGATGATTGCCATAT	1260538	+	TRUE	prs	TRUE	1260151	1261098	-	-7.63523888558408	2.10688015154336e-27	0.690068404814535
ACGCAGATGCCAGCCACACC	671359	+	TRUE	lptE	TRUE	670828	671409	-	-7.63389158874557	5.78435429953465e-29	0.690106146597103
CGAGCTTGTCGTAGTTCATC	3209347	-	TRUE	dnaG	TRUE	3209129	3210874	+	-7.63040250788242	4.61866997531254e-15	0.690203905297915
TGTCCAGCGCAACATCCATG	1800537	+	TRUE	thrS	TRUE	1798666	1800594	-	-7.62909930191864	1.13872129049829e-32	0.690240426237417
CATCGCGGTAGAAACCTTCA	1958649	-	TRUE	argS	TRUE	1958086	1959819	+	-7.62730336198479	1.45067049017948e-08	0.690290761847745
ACCTTTGAGAATCTCGGGTT	3809815	-	NA	NA	NA	NA	NA	NA	-7.62598683973538	9.97537942292436e-08	0.690327665268202
GTCTCCAGAGTCTCAGCGAT	3447932	+	TRUE	rplV	TRUE	3447923	3448255	-	-7.62396314743746	3.03559708022716e-27	0.69038439905922
GCCAGACATTGCCCAGGCAC	1950144	+	FALSE	yecE	FALSE	1949419	1950237	+	-7.62084158577575	3.52170274550191e-09	0.690471929676906
AACAGCAGATTACCGAGAAT	3880262	+	TRUE	dnaN	TRUE	3879244	3880344	-	-7.62022965443592	1.46990564177443e-08	0.690489091231407
TCTGATGCAGACGACGGGTC	1714616	+	TRUE	tyrS	TRUE	1713972	1715246	-	-7.61790639109035	6.4563174675562e-17	0.690554254692942
TTCAACGGATTTACCACGCT	3442787	+	TRUE	rpsE	TRUE	3442748	3443251	-	-7.61611932108383	1.81264091100536e-57	0.69060438724147
TTCATTAATACCTTTGAGAC	4172939	+	TRUE	coaA	TRUE	4172099	4173049	-	-7.61407293281979	1.07462178584175e-07	0.69066180336748
CCGTCTGCGTAACCATCACG	3444002	+	TRUE	rplF	TRUE	3443629	3444162	-	-7.6135558737762	1.31786883953031e-74	0.690676312158218
GCATTTTTTCGAACAGCGCC	705777	-	TRUE	glnS	TRUE	705316	706980	+	-7.61003719240445	4.1590500164769e-06	0.69077506332444
AATCGCCTGAGCTTGCTGTT	2336090	+	TRUE	gyrA	TRUE	2334815	2337442	-	-7.60959063856298	2.40656940163935e-21	0.690787597797794
GATGATTTTGTCGTCGATAT	554036	-	TRUE	cysS	TRUE	553834	555219	+	-7.60797483450584	9.26120212961328e-14	0.690832956158677
CGATGCCACCCGGTTGGTTC	3445636	+	TRUE	rplX	TRUE	3445475	3445789	-	-7.60665468246069	3.02987352499898e-16	0.690870019487752
TGCTCTGACATGGTGTTACC	3323060	+	TRUE	ftsH	TRUE	3323023	3324957	-	-7.60255725625993	3.0423539567409e-26	0.690985080247074
ATCCGCCTGTAGTACCAGAT	3683231	+	TRUE	yhjK	FALSE	3681653	3683602	-	-7.60170009398563	1.67574254917807e-08	0.691009155263867
ACCTTTAGCAGATACGCGCA	3809554	+	TRUE	rpmB	TRUE	3809461	3809697	-	-7.5958860932444	7.59996735106374e-06	0.691172496715591
CAGGGCGAAGTCACAATTTC	3334458	-	FALSE	murA	TRUE	3333257	3334516	-	-7.59303969840297	3.5441130506527e-10	0.691252492919936
GTTCTACACCGTCAACTTCC	1795881	+	TRUE	pheT	TRUE	1793581	1795968	-	-7.58738313849448	7.99233179774581e-33	0.691411522090143
CACCGTGCGGCTGCCGGGGC	599910	+	FALSE	cusA	FALSE	597937	601080	+	-7.58678801303581	4.06513583273198e-22	0.691428257769444
TGCGCGCGCCGCTTTAATGG	101846	-	TRUE	murC	TRUE	100765	102240	+	-7.58562083098498	4.7662666841138e-22	0.691461082755132
CCAGCTCTTTCAGAGAACCG	3723047	+	TRUE	glyQ	TRUE	3722430	3723341	-	-7.58527070685831	1.19409546116458e-07	0.691470930001095
AGCTTACGAAGATGTTGCCA	4019118	-	TRUE	ubiB	TRUE	4018249	4019889	+	-7.5838157230251	2.5938206362092e-11	0.691511854446496
ATCGCCAACGTTAACAACTT	962173	-	TRUE	rpsA	TRUE	961218	962891	+	-7.58171736685016	1.37106279416946e-07	0.691570883608216
AAAGTCCACGCAGGAAAGCC	97136	-	TRUE	murD	TRUE	97087	98403	+	-7.58171726803674	1.1540250954773e-07	0.691570886388188
GAATCCTACCAGGGTGCTGC	1584473	-	FALSE	ydeP	FALSE	1582231	1584510	-	-7.5760239491658	4.70447185398005e-16	0.691731096745495
GGTCGCCAGTACTTGCTCAA	3819713	-	TRUE	gmk	TRUE	3819451	3820074	+	-7.57262891958251	1.70481961605968e-48	0.691826668429941
CGGTGTGGTAACGAACACCC	3472304	+	TRUE	rpsL	TRUE	3472200	3472574	-	-7.57039000523556	2.62827726125678e-11	0.69188970937692
CATCGCCTGTTCCATAGTTT	98249	-	TRUE	murD	TRUE	97087	98403	+	-7.56979704408128	6.96723583836947e-22	0.69190640726498
TCTGCAGAAGGTTCGGTAAA	1796221	+	TRUE	pheS	TRUE	1795983	1796966	-	-7.5695855821771	1.42942097890506e-07	0.691912362263525
ATTGCTGCGGGTATGGGTGG	105623	+	FALSE	ftsZ	TRUE	105305	106456	+	-7.5665740952032	1.47563357147774e-07	0.691997180157056
GATTTCAGACACAACACGTA	3307919	+	TRUE	pnp	FALSE	3307055	3309190	-	-7.56299026003938	2.11191976384558e-08	0.692098145218771
TACGACGGGTCACCACTTCA	2336368	+	TRUE	gyrA	TRUE	2334815	2337442	-	-7.55571161242928	1.3682015644088e-40	0.692303292542138
TTTGTTTGTCATGCTGTAGA	2708180	+	NA	NA	NA	NA	NA	NA	-7.55170861147857	2.29763315808236e-08	0.692416168219431
ACTGACCCACGGCTTTACCG	24178	+	FALSE	ileS	TRUE	22391	25207	+	-7.54570334417802	1.73932075161932e-07	0.692585572376039
CGATTGCTACAGCTTCGTCC	13260	-	TRUE	dnaK	FALSE	12163	14079	+	-7.54524611676696	1.01872383529473e-47	0.69259847381963
GTCCCTGACGCACTACATGG	3525429	-	TRUE	yrfF	TRUE	3524491	3526626	+	-7.53047992191863	1.81008571050891e-16	0.693015385516777
GCAGGCCATTTTTAACTGCC	2743292	+	TRUE	trmD	TRUE	2742594	2743361	-	-7.52447933392883	4.98409368520258e-18	0.693184950780221
TGCCTGGAAAGCAACGTCGA	23016	-	TRUE	ileS	TRUE	22391	25207	+	-7.52225513078136	1.27735651282782e-08	0.693247823633516
GGTGAGGTGACCGCGGTTCC	2435794	-	FALSE	pdxB	FALSE	2434737	2435873	-	-7.52161616761685	3.56360537231382e-37	0.693265887688518
TCAGCAGCTTAGCGATAGCG	1260567	+	TRUE	prs	TRUE	1260151	1261098	-	-7.51933372009841	2.85985955994726e-08	0.693330422191088
GCGTTTAAACCAGGCGAGAT	49899	-	TRUE	folA	TRUE	49823	50302	+	-7.51786830314823	1.40301427715114e-08	0.693371862096882
AGGTTTATTGTTGTTAGGTG	108208	-	TRUE	secM	TRUE	107705	108217	+	-7.5148532485727	3.18482648951659e-08	0.693457139132162
CAGGCATGATCCTTTCCAGG	1261179	+	NA	NA	NA	NA	NA	NA	-7.51292931174404	1.93155898923089e-21	0.693511566235186
CCCTTCAGCACCGTATACGG	197974	-	TRUE	bamA	TRUE	197928	200360	+	-7.51251673729028	1.04320704367451e-26	0.693523238849576
CGGTAGTCGAAGATGGATTC	2962471	+	TRUE	thyA	FALSE	2962383	2963177	-	-7.51156645343445	3.13345681530541e-08	0.693550125908744
AGCAGCATTGAGGTGCTCTA	106783	-	TRUE	lpxC	TRUE	106557	107474	+	-7.50862230987922	3.19374129785771e-08	0.693633439899535
TGCTGCGTGGATGATCGGTC	1143896	+	FALSE	yceQ	TRUE	1143725	1144045	+	-7.50133929098736	1.15124626303934e-36	0.693839622320292
TACGGAAATGCAGCAGGGTC	975710	-	TRUE	mukB	TRUE	975549	980009	+	-7.49840783809784	1.8521692385103e-21	0.693922646416354
TTCAGAATACGCTCGTAGGC	3722614	+	TRUE	glyQ	TRUE	3722430	3723341	-	-7.49093206937922	2.39311561676288e-07	0.694134463802418
ATCAGCAAGGCTATCAGCTG	2283422	+	FALSE	yejM	TRUE	2282398	2284158	+	-7.48898778740285	1.01905537338132e-08	0.694189574007008
AAAAACCGTTGTCAATAACC	1800309	+	TRUE	thrS	TRUE	1798666	1800594	-	-7.48830395825718	2.47884867202139e-07	0.694208959059731
GAATCAGACCGTATGGGCGC	3085732	-	TRUE	metK	TRUE	3084728	3085882	+	-7.48794736888472	6.52485108571524e-16	0.694219068013876
CGATCCATCTGGAGGAACTA	969898	+	FALSE	ycaR	FALSE	969896	970078	+	-7.48379170639503	2.36287844629307e-07	0.694336898625048
TTTGTGTGTGGGTACCCGCC	3351715	-	FALSE	yhcC	FALSE	3351143	3352072	-	-7.48348768600704	5.82740606549838e-36	0.694345520459324
ACTGGAGATTGGTACCGCGA	104038	+	FALSE	ftsA	TRUE	103982	105244	+	-7.47752178511537	3.52495954157041e-08	0.694514753137207
CGATATATTTCGGGTTTTCC	4019148	-	TRUE	ubiB	TRUE	4018249	4019889	+	-7.47466295259644	4.92226553159045e-11	0.694595877905502
GCGTAATGCAGGAAGTGAAA	4163740	-	TRUE	murI	TRUE	4163451	4164308	+	-7.47310237961106	2.60576217676559e-07	0.694640170106221
GTAAAACCATCCAGAATTTC	4390062	-	TRUE	orn	TRUE	4389627	4390172	+	-7.46740591169084	2.77328238972017e-07	0.694801895278861
TACCGGAGGCCGCCAGAGTA	1348487	+	TRUE	fabI	TRUE	1348275	1349063	-	-7.46101837957092	2.37445127715389e-07	0.694983329647382
GTTCCAGTTTTCACTACTAA	195108	-	TRUE	ispU	TRUE	194903	195664	+	-7.45890318598378	2.64730879842181e-07	0.695043431454518
AGCCAGGCGTGCAGGCGTGA	4599409	+	TRUE	dnaT	FALSE	4599001	4599540	-	-7.45761827073504	1.34464120719076e-36	0.695079946535166
CCGGTTGTGGGGTAAACCAC	689471	+	TRUE	lnt	TRUE	688566	690104	-	-7.45465983932366	2.61750686610758e-15	0.695164034654189
GCCATTGTTGTTACGACCAC	3449267	+	TRUE	rplB	TRUE	3448565	3449386	-	-7.4499639037642	2.99973305556136e-07	0.695297550005085
TGACCTCATCCCCAATCATG	2817135	+	TRUE	csrA	TRUE	2816983	2817168	-	-7.44394226068901	7.47970549045678e-40	0.695468833083425
GTTTACCGTTGTCCTGCATC	3341689	-	TRUE	lptA	TRUE	3341402	3341959	+	-7.4407556886759	8.64125363138421e-27	0.695559507919658
TAGCGGCACGGGATTAGGGC	3532672	-	FALSE	envZ	FALSE	3532538	3533890	-	-7.4400376223023	4.44521327880657e-08	0.695579943972221
ATTACATAACAGGCTTAAGC	22340	-	TRUE	ribF	TRUE	21407	22348	+	-7.43883720787555	3.2545146018061e-07	0.695614110254053
GCAAATGCGCTGCTTCGCGC	2720882	-	TRUE	pssA	TRUE	2720749	2722104	+	-7.43785518122986	9.79140610474004e-12	0.695642063263281
AGTACGTTGAAGAACGGGCA	913292	+	TRUE	ybjE	FALSE	913181	914080	-	-7.43488297205525	7.24138879730024e-11	0.695726679740677
ACTGTTTGTCTGTTCCTTGC	707022	-	NA	NA	NA	NA	NA	NA	-7.42570164937704	0.00163384865952707	0.695988194895256
GACTTCATCTGCCAGAATTT	1263592	-	TRUE	hemA	TRUE	1262937	1264193	+	-7.42326988399389	3.59006011011921e-07	0.696057492741428
CGCAGAGTAGTCAACCACAA	1958426	-	TRUE	argS	TRUE	1958086	1959819	+	-7.42320213068258	0.00048243936169663	0.696059423700347
GATAGCAAAACCCATCTTGC	3811391	-	TRUE	dfp	TRUE	3810754	3811974	+	-7.41603065853563	1.52251673649279e-13	0.696263870149465
GTTGCTAACTCTGCTGTAAA	2744338	+	NA	NA	NA	NA	NA	NA	-7.41265874876475	3.78577469609062e-07	0.696360039066215
AAACCAGATGCCAATAGAAC	99436	-	TRUE	ftsW	TRUE	98403	99647	+	-7.41061274308619	4.11367836711946e-07	0.69641840534359
TACGAAACGGTCGGGCAAAA	904086	+	FALSE	ybjQ	FALSE	903816	904139	+	-7.40851782566172	5.38712854959528e-08	0.69647817706191
GGATCTTACCGCCGAGTTTC	3324426	+	TRUE	ftsH	TRUE	3323023	3324957	-	-7.40509302479323	8.83588147271783e-11	0.696575914819486
CGGGGAGTCCCAGCACATCC	1602541	-	TRUE	lsrD	FALSE	1602071	1603063	+	-7.40088921334676	1.68514489615658e-20	0.696695921667534
CCGCTTCAGTCATGTAGACC	109553	-	TRUE	secA	TRUE	108279	110984	+	-7.40048751643809	1.04707804793329e-10	0.696707391135012
CTGATAAATTTACGGTTTTT	3330921	+	TRUE	rpmA	TRUE	3330884	3331141	-	-7.39140284856758	4.57309513034894e-07	0.696966882370128
GTCAGTCGTGAGCGTCAGAC	2115197	-	FALSE	wcaK	FALSE	2115148	2116428	-	-7.38623093962506	1.10769548131293e-20	0.697114697309652
AGCGGCATTGTTGCGGATAA	4545606	+	FALSE	fimD	FALSE	4543119	4545755	+	-7.38275668401557	3.24678176316666e-11	0.697214027942319
CGCACAGGCGATATCAGTGG	1959026	-	TRUE	argS	TRUE	1958086	1959819	+	-7.38070335941561	1.1862332591922e-07	0.697272746786231
TGTTGACCAGCGCAGCTTCC	95174	-	TRUE	murF	TRUE	94650	96008	+	-7.38042314217269	2.62248725718219e-20	0.697280760914842
GTTTCGGATCCCAGTTTACC	4481347	+	TRUE	valS	TRUE	4479005	4481860	-	-7.37974626649236	4.91871103048536e-28	0.697300120115068
CTGAATCTGACGCTGCTCGT	3912747	+	TRUE	glmU	TRUE	3911853	3913223	-	-7.37871569047328	1.38491655807067e-44	0.697329597499808
CTGCTAACTGCTTATCGCTC	102607	-	TRUE	ddlB	FALSE	102233	103153	+	-7.37693296816867	1.61633303989053e-15	0.697380594277326
ACGGCCTGAGCAACGTTACT	3469465	+	TRUE	fusA	TRUE	3469422	3471536	-	-7.37422778070977	6.69825153707221e-08	0.697457993457094
TTACTCGAAGAAGATGGCTG	696095	+	TRUE	glnU	FALSE	696088	696162	-	-7.37326829704304	1.00678852718605e-06	0.697485449748339
CTTGGACATTTTGCTCATGC	672162	+	TRUE	leuS	TRUE	671424	674006	-	-7.37253053498485	5.61177687604032e-52	0.697506562791986
CCTTCGATATTGACACCGAA	203139	-	TRUE	lpxA	TRUE	202560	203348	+	-7.36982119200791	6.88530225684253e-08	0.697584108888544
CGCGCAGTGTAGGACCAATG	3208612	+	NA	NA	NA	NA	NA	NA	-7.36034647749211	0.000305360793309104	0.69785542729071
ATTTCGCCAGCATACACTCC	204184	-	TRUE	lpxB	TRUE	203348	204496	+	-7.35383935040907	2.46523412305608e-25	0.698041887991449
TCAATTTAAGTAGCCCAAAG	3471585	+	TRUE	rpsG	TRUE	3471564	3472103	-	-7.34004068619047	5.62097502513551e-07	0.698437616402387
GAAACGGTGGGAGGCAGAAA	475784	-	TRUE	ffs	FALSE	475672	475785	+	-7.33203553138511	6.75128042785269e-07	0.698667399941622
GCGGCGGCCCACTTCATCGT	93887	-	TRUE	murE	TRUE	93166	94653	+	-7.32931120909591	1.33711559525669e-43	0.698745634592576
GTCCCTTTCAAAAAAGGCCG	3208698	+	NA	NA	NA	NA	NA	NA	-7.32022042951027	6.42834499457337e-07	0.699006822297224
CTGCCTGCGGAATGGTACGC	496656	-	TRUE	adk	TRUE	496399	497043	+	-7.31934409262568	4.00929055409612e-44	0.699032010701098
ATACCGGTACCTTCGGAAGC	3442959	+	TRUE	rpsE	TRUE	3442748	3443251	-	-7.30789213799653	3.03528820688382e-10	0.699361339251078
GAACCGGAGATAGTAAAGAA	3324323	+	TRUE	ftsH	TRUE	3323023	3324957	-	-7.30760974475952	6.73853727819218e-07	0.699369464069376
CGCGAACATCAGACGGAACC	3069891	+	TRUE	pgk	TRUE	3069481	3070644	-	-7.29874869801135	1.69709277959995e-08	0.699624503766785
AACTTGAACATAGACGATAG	1262783	-	NA	NA	NA	NA	NA	NA	-7.29744544911042	1.0241678084487e-07	0.699662029722652
CATTTCAGCTTCGGCAACTT	673143	+	TRUE	leuS	TRUE	671424	674006	-	-7.28909854379359	8.53974664154744e-25	0.699902467329068
GATTGCCAATGGTGCAGCCG	3427542	-	TRUE	yrdA	FALSE	3427258	3427812	+	-7.28596549201588	3.30480212173023e-39	0.699992759422672
TTTACCGGTCAGGTCGAGAA	1794100	+	TRUE	pheT	TRUE	1793581	1795968	-	-7.28406862751191	9.06652081177526e-07	0.700047436892035
CAAGGACATAAGAACGAATC	3033340	+	TRUE	prfB	TRUE	3033206	3034304	-	-7.28105013437938	8.67210586268041e-07	0.700134463127269
CATGTAGGCGTTCAGGGTAC	3877273	+	TRUE	gyrB	TRUE	3875728	3878142	-	-7.28049200117332	8.96057830906714e-25	0.700150557047135
CGATGCTGGATGGCCAGGAC	3693805	-	FALSE	bcsQ	FALSE	3693256	3693984	-	-7.27980722908321	9.07488790161744e-20	0.700170303643795
CATCAGAAAGTTCGTTCGCC	3471746	+	TRUE	rpsG	TRUE	3471564	3472103	-	-7.27698519395913	9.22249985312439e-16	0.700251693700012
AACTCTTCAACGTTGGTATC	4019302	-	TRUE	ubiB	TRUE	4018249	4019889	+	-7.27570493914848	6.66253616122537e-20	0.700288623651244
ACTGGGTGCAATGTTCTGCG	201257	-	TRUE	lpxD	TRUE	200971	201996	+	-7.27008739144365	7.33767369347318e-14	0.700450712262095
GTTTACCATACACTGGCCCG	2962910	+	TRUE	thyA	FALSE	2962383	2963177	-	-7.26466334727422	7.85702131803758e-20	0.700607288743188
ACCAGAACTTCAGAACCGTT	3443495	+	TRUE	rplR	TRUE	3443266	3443619	-	-7.26310027715775	1.28384050694698e-07	0.700652423054298
GGTCTTACCAATTGCGTGAA	2517363	+	TRUE	gltX	TRUE	2517279	2518694	-	-7.2617081930503	4.47940397889702e-15	0.700692624968163
GGTGATGAATCGGTGCCATG	96958	-	TRUE	mraY	TRUE	96002	97084	+	-7.26062594835388	2.30666164498558e-41	0.700723882235754
TAAACGCCAGCAGCAGCCCC	3076206	+	TRUE	cmtA	FALSE	3075493	3076881	-	-7.26039917191748	4.41473899465249e-15	0.700730432320268
CCATATCCAGCGCCAGTACC	2731490	+	TRUE	clpB	FALSE	2729622	2732195	-	-7.2602788744311	8.24635791554595e-33	0.700733906975694
GGTTGCGTTGCGCCAGCTTC	3636544	-	TRUE	pitA	FALSE	3635665	3637164	+	-7.25733930235726	2.34203205691771e-45	0.700818823866144
CAGAGGGTTCATGGTAAAAG	93462	-	TRUE	murE	TRUE	93166	94653	+	-7.24795850732132	1.17446219625357e-06	0.701089949278291
ATCTGCGAAGAAGTCTCGGA	2344747	-	TRUE	nrdA	TRUE	2342887	2345172	+	-7.24695513398572	1.09548577851638e-06	0.701118961373091
GGTGCGCAGATCTTTAATGC	3033311	+	TRUE	prfB	TRUE	3033206	3034304	-	-7.24480120421265	2.01076784431411e-10	0.701181249407241
ATGGGGTACCAGGGAGCTGC	2819959	+	TRUE	alaS	TRUE	2817403	2820033	-	-7.23693038804644	1.44738740515552e-07	0.701408954344496
CTCCATCATCCCGGAACCAC	209436	+	FALSE	accA	TRUE	208621	209580	+	-7.23615796724034	1.31273223981474e-14	0.701431308666112
GTGGAAGAGGGCGGATTCTT	881090	+	FALSE	dacC	FALSE	879950	881152	+	-7.23422611066903	6.90310812518515e-15	0.701487223993334
CTTCTCACGCGCTAGCCTCC	1797246	+	NA	NA	NA	NA	NA	NA	-7.23003692966772	1.5372273470642e-28	0.701608505564632
GTCATCGTCCAGATCTTCCT	3211625	-	TRUE	rpoD	TRUE	3211069	3212910	+	-7.22639533742119	5.23442105731114e-32	0.701713967894391
CTGGCACTGGGTCACGATCC	3033500	+	TRUE	prfB	TRUE	3033206	3034304	-	-7.22581262137547	4.2843305890179e-29	0.701730846584695
GCTTCGAAAATCTTCTCGCG	3315493	+	TRUE	nusA	TRUE	3314061	3315548	-	-7.22354645776265	3.67464297471064e-10	0.701796494978224
CTATAGTTGCCAGGTCCGAC	1349198	+	NA	NA	NA	NA	NA	NA	-7.21720552692419	3.99074591240896e-24	0.701980250409146
GCAGGTCGATGTCCAGCGGA	94853	-	TRUE	murF	TRUE	94650	96008	+	-7.21712184494907	5.97713778772883e-43	0.701982676093512
CCAGCATCGCACTGACCGCC	492017	-	TRUE	dnaX	TRUE	491316	493247	+	-7.21180285915016	3.96222537416009e-35	0.702136891618351
GGATTCGGTATCCAGAGCCG	967366	-	TRUE	msbA	TRUE	965844	967592	+	-7.21099540445862	4.63203662775499e-10	0.702160308405549
TAAAGCTGTGATGGGTGGCG	2963479	+	TRUE	lgt	TRUE	2963184	2964059	-	-7.20922815666419	4.13859090679562e-10	0.702211565357995
AACCTGTTCATCACTGTAGC	2282164	-	TRUE	yejL	FALSE	2282151	2282378	+	-7.20461773684434	8.21486148164114e-19	0.702345320418862
CCGGCTTCAGAACGGAAGCA	939443	-	TRUE	serS	TRUE	938651	939943	+	-7.20370648790953	1.54965864025656e-06	0.702371763121983
GGCCAGCAGAGGCGTAAACA	4272171	+	FALSE	ssb	TRUE	4272148	4272684	+	-7.19902708819965	8.91385227947509e-08	0.70250758173207
TGATGGCGCTCGATCTGGCT	3209441	-	TRUE	dnaG	TRUE	3209129	3210874	+	-7.19873626364974	4.13957380198798e-24	0.702516024588302
ATAACGGTTACTATCTTTCT	3324781	+	TRUE	ftsH	TRUE	3323023	3324957	-	-7.19731937539902	1.3895229221555e-06	0.702557160826814
CCAGGCCCATAATCAGACGA	1015285	+	TRUE	fabA	TRUE	1015175	1015693	-	-7.19582986888142	1.50642931056279e-06	0.702600410571738
ACCGGGATCGCGGCGAGACA	804449	-	TRUE	ybhJ	FALSE	802726	804987	+	-7.19152993052039	4.35131641307756e-10	0.70272529471369
CACGACGCAGGATAACTTTA	3312950	+	TRUE	infB	TRUE	3311364	3314036	-	-7.19045779402173	1.99222470067565e-07	0.702756439946385
ATTCACGCCATCGAGCTTCC	3526076	-	TRUE	yrfF	TRUE	3524491	3526626	+	-7.18820036664982	3.75862919432189e-92	0.702822026538165
TGTACGGAGTCGGAGAAACC	1883337	-	TRUE	yeaW	FALSE	1882689	1883813	+	-7.18527877694499	1.65208693176694e-06	0.70290692767228
TCTTTTCGTACTAGCGTGTC	3210164	-	TRUE	dnaG	TRUE	3209129	3210874	+	-7.18462291463884	2.21285258345773e-14	0.702925989791223
CACGTCAACAACAGAAGAGT	24009	-	TRUE	ileS	TRUE	22391	25207	+	-7.18461960328498	1.71393920265878e-06	0.702926086035726
TTACGATGATCTGCACATCA	968002	-	TRUE	lpxK	TRUE	967589	968575	+	-7.18027278768917	1.08176581005677e-23	0.703052448963899
TTCGGGATCTTTGTCTGTTC	3809874	-	NA	NA	NA	NA	NA	NA	-7.18021209371763	5.96645727583406e-46	0.703054213673206
TTTTCCAGCAACGGAGCAAA	3449301	+	TRUE	rplB	TRUE	3448565	3449386	-	-7.17947716469835	1.66821907777278e-06	0.703075582826072
TGCTTGCTGGTGCGTTCTGG	103596	-	TRUE	ftsQ	TRUE	103155	103985	+	-7.16717300386012	1.17573417278562e-76	0.703433537604281
ACGGATACGACGATAGCTAT	24336	-	TRUE	ileS	TRUE	22391	25207	+	-7.16658034330272	2.03981315266753e-14	0.703450788589177
AGTGAATCCGCTTATTCTCA	3182727	-	FALSE	sroG	FALSE	3182592	3182740	-	-7.16223359031902	7.40808990737884e-24	0.703577338429975
CAGACGCCCAGTCCCAGCTG	3154690	-	TRUE	dkgA	FALSE	3154645	3155472	+	-7.16144036477183	7.22991844260328e-09	0.703600437032991
TGGCGCTGCCTGTAAAGCGG	1149508	+	FALSE	fabD	TRUE	1148951	1149880	+	-7.16027144648977	5.2889255735139e-08	0.703634478513689
GGCTACGGCGGCGCGGAGTT	4003620	+	FALSE	pldA	FALSE	4002885	4003754	+	-7.15914055589259	7.70917892917081e-33	0.703667415679387
AGCGGCCTTTCAGTTTATCC	3792801	-	TRUE	rfaD	FALSE	3792010	3792942	+	-7.15866495855705	1.7798090594198e-14	0.703681268363241
GTCCTCCACTACCAGGCCCA	4176873	-	TRUE	rplK	FALSE	4176470	4176898	+	-7.15768459491954	3.92970800804939e-33	0.703709825053978
GTTTTCATCACGCTGATATT	1888917	+	TRUE	tsaB	TRUE	1888596	1889291	-	-7.15282304410143	1.11006170299686e-23	0.703851469824424
AGATCGGCAGGCAGGTTCCA	49883	-	TRUE	folA	TRUE	49823	50302	+	-7.14980422292794	3.02758678603317e-14	0.703939454045765
CAATAAATAGAGCGACAGGT	1174655	-	TRUE	lolC	TRUE	1174650	1175849	+	-7.14777520318512	2.11966097159047e-06	0.703998602643844
TTCCGGTGCGGGCCATGTGC	3614738	+	FALSE	nikC	FALSE	3614205	3615038	+	-7.14622345455809	1.96166746159984e-38	0.704043844868457
GGGTAATCGTCTGGATTATT	192759	-	NA	NA	NA	NA	NA	NA	-7.14256454762047	1.67333372145849e-15	0.70415054566668
CATTTACGTCCATGCTTCCC	1798749	+	TRUE	thrS	TRUE	1798666	1800594	-	-7.14117402852241	2.76149079082454e-136	0.704191104372752
CCCCGGTCGGGAACTGCGGC	205956	-	TRUE	dnaE	TRUE	205126	208608	+	-7.13673260702645	2.72976692978803e-07	0.704320683200142
TTAATGTCGATAACCGAGAT	3342473	-	TRUE	lptB	TRUE	3341966	3342691	+	-7.13485043180868	5.9563499957816e-10	0.704375610200374
CAAAATGCGGTGATAAGAGC	3034352	+	NA	NA	NA	NA	NA	NA	-7.13250111868534	1.8476650164323e-06	0.704444181578727
GATTATTTCACCTGATGACC	2194335	-	TRUE	metG	TRUE	2192322	2194355	+	-7.13153955307071	2.88451028251299e-07	0.704472251453877
GCGCCCATACGGCTCAGCTC	3333510	+	TRUE	murA	TRUE	3333257	3334516	-	-7.13124949956888	9.85313544721571e-27	0.704480719090146
ACATCAACGTTATTCACAAC	1149629	-	TRUE	fabD	TRUE	1148951	1149880	+	-7.12463034739166	3.51864379617377e-31	0.704674009723761
AGAGGGTTTGCTATGATCAG	3524365	+	NA	NA	NA	NA	NA	NA	-7.12307933595062	3.16149205766898e-07	0.704719317266635
GAACCACTTTCACCGCATTC	970488	-	TRUE	kdsB	TRUE	970075	970821	+	-7.11617122064134	7.83405615295735e-41	0.704921185227342
GACCCAGGCGCTCGATGAGC	3309469	+	TRUE	rpsO	FALSE	3309437	3309706	-	-7.11609965611152	3.03432989702186e-07	0.704923277081078
AGCACATCGGCGATGTTCTT	4262871	-	TRUE	dnaB	TRUE	4262337	4263752	+	-7.11446249866895	4.97731750453334e-14	0.70497113509946
GCCTTTTTCAAACTCTGCGC	102585	-	TRUE	ddlB	FALSE	102233	103153	+	-7.1129695807018	1.19296185348397e-20	0.705014782318869
TGCTTGTAATTCTTGTTCGC	928836	+	TRUE	cydD	FALSE	928419	930185	-	-7.1129389573184	5.36738399150563e-32	0.705015677686208
TAAATAAGAATGCGGCCAGC	2282910	-	TRUE	yejM	TRUE	2282398	2284158	+	-7.10884598934828	3.04665775939464e-07	0.70513536846645
AGTTCGCCACGGTTGTGCGC	104776	+	FALSE	ftsA	TRUE	103982	105244	+	-7.10809347994838	8.96744379854298e-28	0.705157378543415
TACCCACCTGACGCTGAGCG	970419	-	TRUE	kdsB	TRUE	970075	970821	+	-7.10055444384348	4.31142778760709e-12	0.705377962968096
CGGCGCAGCTCTTTCGCTTT	3437906	+	TRUE	rplQ	TRUE	3437638	3438021	-	-7.10038002404913	1.12182601009664e-09	0.705383067944827
CAGGATTTTAGCTTGTTTCA	4484187	-	NA	NA	NA	NA	NA	NA	-7.09803285858664	1.85671084022643e-06	0.705451772755075
GGACGGTAACGCTAGCATTA	1262762	-	NA	NA	NA	NA	NA	NA	-7.0965002401714	5.14141425273829e-08	0.705496641859186
CCGGAGGGCCCCCCCAAATG	2819460	+	TRUE	alaS	TRUE	2817403	2820033	-	-7.09224657923098	3.05557928919565e-06	0.7056212024102
AGTTCTGTTGAATGGGTTAA	4173131	+	NA	NA	NA	NA	NA	NA	-7.09129082195385	3.52146467025751e-07	0.70564919603678
ACTCGCGTTGGCCCGGCGGA	938201	+	FALSE	rarA	FALSE	937217	938560	+	-7.0890549534886	3.29214465602577e-14	0.705714692121537
TGACCAAAGCGCGCTACCAG	3334221	+	TRUE	murA	TRUE	3333257	3334516	-	-7.08792456288257	3.72328087542422e-32	0.705747809680355
CATTGTTGTTGACGACCACC	3340950	-	TRUE	lptC	TRUE	3340858	3341433	+	-7.0863489222745	1.25193235513037e-12	0.705793977113683
CTTCTTTCATGGTTGCCATC	4178432	-	TRUE	rplJ	TRUE	4178019	4178516	+	-7.07990274771938	3.18107108999966e-06	0.705982917709669
TCAGGAAACCCAGGTTGCCA	2749134	-	TRUE	nadK	TRUE	2748853	2749731	+	-7.07602244630558	3.35672529003591e-06	0.706096700063869
CAATTACTTACGACGCCAGG	555200	-	TRUE	cysS	TRUE	553834	555219	+	-7.07230460312756	1.28375453931663e-27	0.706205753054126
TAGATCGGAATCAGCGTAAT	4253243	+	TRUE	plsB	TRUE	4252066	4254489	-	-7.07076710598967	3.85576252935507e-05	0.706250861268555
TGTGCGCTGGGTTCCATCGT	104789	+	FALSE	ftsA	TRUE	103982	105244	+	-7.0667200836473	2.23903564499792e-68	0.706369623318595
ATTAACGCGCCCTGCGATAC	1800493	+	TRUE	thrS	TRUE	1798666	1800594	-	-7.05926403826503	1.23310953740235e-22	0.706588529597679
TAACCGAAGCCCGGCGTTCA	4447125	+	NA	NA	NA	NA	NA	NA	-7.05904568527446	2.03888063312699e-07	0.706594942392291
CCGTCTTCTTCCGGGCTTCC	2819441	+	TRUE	alaS	TRUE	2817403	2820033	-	-7.05603412500451	6.20614428549151e-57	0.706683400583046
GGATAAGTGAAACAACGCCC	2704537	+	TRUE	lepA	FALSE	2703347	2705146	-	-7.04670886632837	3.93702182654214e-06	0.706957450788802
AGTTGCGCGCCACGCGCTTC	3314986	+	TRUE	nusA	TRUE	3314061	3315548	-	-7.04000041638606	1.77113488709202e-09	0.707154729848196
CTTACTTAGTCTGTCAGGCG	3524457	-	NA	NA	NA	NA	NA	NA	-7.0380718905658	8.10473193660628e-14	0.707211463439877
ATCGTACAGGCGGATCTGAC	4182887	-	TRUE	rpoB	TRUE	4179268	4183296	+	-7.0366598633969	1.16523704940971e-22	0.70725300838856
GAATTCGTCCACCAGGATAT	3996649	-	TRUE	uvrD	FALSE	3996006	3998168	+	-7.03089540076373	2.25574835897047e-09	0.707422662222554
AACGCACTGACTTCCTGCGC	195134	-	TRUE	ispU	TRUE	194903	195664	+	-7.03068500489497	3.30970760468249e-101	0.707428855920551
GTAGTTCGAGAACAAGCACG	2343416	-	TRUE	nrdA	TRUE	2342887	2345172	+	-7.02805614116693	4.48867455333478e-06	0.707506254360466
GCAGGCTCTGAAACGCTGGA	491291	-	NA	NA	NA	NA	NA	NA	-7.026440751736	4.52197821754611e-06	0.707553822709745
AGATAATGCTGGTTCTGTAT	1337216	+	NA	NA	NA	NA	NA	NA	-7.0261850055861	1.15262671051594e-18	0.707561354249436
GCTGAACTGTGCGTCTATAC	1385544	+	FALSE	tyrR	FALSE	1384744	1386285	+	-7.02243818027375	6.52100119567799e-58	0.707671713937834
CAGGTCTTCTAAGCCAGGTA	2742719	+	TRUE	trmD	TRUE	2742594	2743361	-	-7.02184301691664	1.59796718097379e-09	0.707689247158442
AATAAAGGTGCCGCGAGACT	2193325	-	TRUE	metG	TRUE	2192322	2194355	+	-7.01288687755635	4.60191647876728e-06	0.707953195577207
GCGACGATGATCAAATCCGA	4263003	-	TRUE	dnaB	TRUE	4262337	4263752	+	-7.0108817594118	4.87714194868388e-06	0.708012315846599
GGTGGAGGCATCGCTGTTGA	3193657	+	TRUE	rfaE	FALSE	3193342	3194775	-	-7.01061715228537	3.13091984396325e-30	0.708020118440892
GATCAGGGCGATAACATATT	196715	-	TRUE	rseP	TRUE	196546	197898	+	-7.00950595045822	4.99188307148465e-06	0.708052886847326
GCTACGATAGAAGCCCTGGA	1676824	-	TRUE	ydgH	FALSE	1676451	1677395	+	-7.0092339841657	5.7015087553543e-07	0.708060907366376
AGGAAAGATCGTTGAACGAC	3448444	+	TRUE	rpsS	TRUE	3448270	3448548	-	-7.00310174757438	5.15015942607612e-06	0.708241800529714
GCGACCAGCGGCGAAGAGGA	2875134	+	FALSE	iap	FALSE	2874603	2875640	+	-7.00044381309745	4.80706240154801e-06	0.708320234925106
GCCAGACGATGGGATTAAGA	2282736	-	TRUE	yejM	TRUE	2282398	2284158	+	-6.9968458367109	5.39106192574414e-07	0.708426437194218
GTGATGGCGACGCGAGCGTC	433901	-	TRUE	ribE	TRUE	433871	434341	+	-6.99434112204746	6.95304148991277e-06	0.708500388217761
CTTAGCTCTGCTACGTCGCA	2713547	+	FALSE	eamB	FALSE	2713445	2714032	+	-6.99074654973422	9.00354500738538e-27	0.708606543975528
TCACGCATCACAAAAGCAGC	20759	+	NA	NA	NA	NA	NA	NA	-6.98737312738076	2.45240248611224e-09	0.708706197620076
CCAGCCGTAAGCGTAATCGC	3033752	+	TRUE	prfB	TRUE	3033206	3034304	-	-6.98503746384621	3.44584673415382e-17	0.708775211446924
TGCTAAAAGGGTCATGTCTG	1262929	-	NA	NA	NA	NA	NA	NA	-6.98502114753048	1.04563925680618e-09	0.708775693606188
GGAGTTATACCAGTCAAGAT	55727	+	TRUE	lptD	TRUE	54755	57109	-	-6.9831828058588	5.67919845915182e-06	0.708830022170665
AATGGTTTTGCCGGATGGAA	2672088	-	FALSE	yphB	FALSE	2671838	2672710	-	-6.98116427481979	5.63924810348511e-06	0.708889685470775
GTACCGGGGTTCGCCCAGCA	2270471	-	TRUE	yejA	FALSE	2270386	2272200	+	-6.9809531687975	5.20162565410316e-34	0.70889592587668
TCTTCCGGTTTGATGAATTC	191388	-	TRUE	tsf	TRUE	190857	191708	+	-6.98004375445614	2.61227160820103e-07	0.708922809902752
CCGGCATTGCCATTCACTTT	4170740	-	TRUE	murB	TRUE	4170080	4171108	+	-6.97534360736357	2.08247613646362e-64	0.70906178774342
TTGATGAATTTACCGTAGAT	3446496	+	TRUE	rpsQ	FALSE	3446336	3446590	-	-6.96978038398874	7.39080406415441e-07	0.709226356172859
ATGCTGCCATTCGCATAAGG	22559	-	TRUE	ileS	TRUE	22391	25207	+	-6.96932971616202	7.07767967387397e-07	0.709239690942932
AAACACCCCAGTCGCGCAGG	672761	+	TRUE	leuS	TRUE	671424	674006	-	-6.96888451106222	7.15944347587094e-07	0.709252864569233
ACTTGAACCAAACAGCGTAG	3320411	+	TRUE	secG	FALSE	3320195	3320527	-	-6.96837602494098	5.81881109522797e-07	0.709267911280688
TAATGTGGTGGATACCTAAA	3820935	-	TRUE	spoT	TRUE	3820423	3822531	+	-6.95932010561785	6.80974118525922e-06	0.709535993720203
CATCGCATAGCGCTGGTTGC	107059	-	TRUE	lpxC	TRUE	106557	107474	+	-6.95615896107849	1.15582412677653e-17	0.709629620826104
GCTCCAGCATATGGCCGAGG	2192384	-	TRUE	metG	TRUE	2192322	2194355	+	-6.95229591389523	5.26468666372057e-30	0.709744070510499
GGGTTGCCAGTCCGGATACA	4599271	+	TRUE	dnaT	FALSE	4599001	4599540	-	-6.95083318562411	9.30366443949997e-13	0.709787416088883
CCACGGCTGAACGACGACAT	689023	+	TRUE	lnt	TRUE	688566	690104	-	-6.95082103030175	9.13719371613638e-20	0.709787776314314
AGAACATCGTTACGCCCATC	3884505	-	TRUE	yidC	TRUE	3883099	3884745	+	-6.95051343915241	6.40602872665348e-59	0.709796891961812
ACGCGTAACCGGTACCTGCC	4187443	-	TRUE	rpoC	TRUE	4183373	4187596	+	-6.94933252511264	5.41834009093257e-11	0.709831891230131
TGGCATAACCTGCGGCCGAG	3807033	-	TRUE	waaA	TRUE	3806563	3807840	+	-6.94818855524427	1.81573549019883e-10	0.709865798859232
CTTTGGCGGGTGCCATTTCG	3584507	+	TRUE	ggt	FALSE	3583104	3584846	-	-6.94795196910391	9.73559966131645e-18	0.709872811751598
CATTGACGCGTTAGGCGCGA	1004221	+	FALSE	pyrD	FALSE	1003991	1005001	+	-6.94307056145301	2.7367574551698e-09	0.710017537490327
ATTTCTGCGGAGTCATCATA	2528340	+	TRUE	zipA	TRUE	2528269	2529255	-	-6.94195841125128	7.11630160459528e-06	0.710050519176034
CACGTAGTTACGTGCGCGCT	1958705	-	TRUE	argS	TRUE	1958086	1959819	+	-6.93822764447024	2.32051961430532e-27	0.710161180371556
AAAGCGAGCTACTTGTACTT	667024	+	TRUE	mrdA	TRUE	665539	667440	-	-6.93751586762057	3.08681852611287e-09	0.71018229686044
CCGGTGATCATTTCTGTAAC	3404830	-	TRUE	accC	TRUE	3403939	3405288	+	-6.93671823266216	7.14890873729124e-06	0.710205962018767
GATCGCCTGACGGATCCACC	3212363	-	TRUE	rpoD	TRUE	3211069	3212910	+	-6.93649368182845	7.88072196986856e-11	0.710212624537639
AATAACTTTAATATCGTAAC	2749103	-	TRUE	nadK	TRUE	2748853	2749731	+	-6.93638806881672	7.186132329425e-06	0.7102157581639
TCAGACTTAAGGCATCTCGC	491954	-	TRUE	dnaX	TRUE	491316	493247	+	-6.92556724687742	5.23908141859607e-37	0.710536967612281
CCAGCCAGTCCAGTTGAGAA	1148683	-	TRUE	fabH	FALSE	1147982	1148935	+	-6.92087538668693	9.132714135613e-07	0.710676332918037
TCCATCAGTTCAAGGGTACG	23849	-	TRUE	ileS	TRUE	22391	25207	+	-6.92069190905457	1.85641995828992e-17	0.710681783981553
GAAGAGGATCAGCAAGTAGG	2282597	-	TRUE	yejM	TRUE	2282398	2284158	+	-6.92021420931635	8.24616159313066e-06	0.710695976684812
TCACCGCCACAGATAGCGGC	4486180	-	TRUE	lptG	TRUE	4485341	4486423	+	-6.91898512205688	3.14855179704279e-05	0.710732496100909
TTTACGCTGATACACTTCGA	110506	-	TRUE	secA	TRUE	108279	110984	+	-6.91733070899795	2.7079538235287e-28	0.710781658991922
GCAAACCAGGTAGAGTTCCA	3447856	+	TRUE	rpsC	TRUE	3447204	3447905	-	-6.91731959012348	9.11580992900529e-07	0.710781989425774
TTATTGATGACAGCCTGTAC	988063	+	TRUE	asnS	TRUE	986808	988208	-	-6.90360925486843	6.47942139133352e-26	0.711189670929616
CCGGCAGATCTTTACCCGCA	4447657	+	TRUE	ppa	TRUE	4447145	4447675	-	-6.89779541650048	5.46111654362456e-29	0.711362688637889
CGTCGCCGCCGGTTCCGGCT	1264579	-	TRUE	prfA	TRUE	1264235	1265317	+	-6.89306718077512	3.21717589179511e-13	0.711503461291842
CACGATCGAGGCAGTCATAC	1799187	+	TRUE	thrS	TRUE	1798666	1800594	-	-6.89128118375495	1.90887335613603e-17	0.711556649861007
CTGTGCATGTTCCGGCACGT	3511412	+	TRUE	trpS	TRUE	3510656	3511660	-	-6.89037551733566	3.62341564651304e-207	0.711583624445929
GCACTTGGCGCGGAACTCGG	22746	-	TRUE	ileS	TRUE	22391	25207	+	-6.88898906296727	2.41545055500143e-17	0.711624922896106
ATACAGCTAACGCTGCGACT	1948598	-	NA	NA	NA	NA	NA	NA	-6.88850633741486	8.81963690650487e-09	0.711639303013856
TTGCCGTCAACTTTGAATTG	55662	+	TRUE	lptD	TRUE	54755	57109	-	-6.88836954013609	1.05536276424791e-10	0.711643378232132
CAGTTCCAGATAGCGGGCGC	1154855	-	TRUE	tmk	TRUE	1154347	1154988	+	-6.88151655171027	3.32299195735415e-13	0.711847589879402
CTCCATAATCGCCGCAATTG	671835	+	TRUE	leuS	TRUE	671424	674006	-	-6.87962114321395	5.158712866809e-34	0.711904091695819
TATTCGCCCAGCGCGGAGAA	90325	-	TRUE	rsmH	FALSE	90094	91035	+	-6.87253202216018	1.18873239787764e-06	0.712115496765043
AGGTTATAAGCAACGGTGAT	3315829	+	TRUE	rimP	FALSE	3315576	3316028	-	-6.86745453997745	1.01873303786153e-06	0.712266989826057
TATACGCGACGTTTTTTCGG	3439753	+	TRUE	rpsK	TRUE	3439731	3440120	-	-6.86734650060978	5.41766411048651e-09	0.712270214016697
CGACGCTATCGAGTTGCCCC	4262615	-	TRUE	dnaB	TRUE	4262337	4263752	+	-6.86027303949492	1.2898127933241e-36	0.712481369004479
ATGATCGAAAGCCGCCCACC	90787	-	TRUE	rsmH	FALSE	90094	91035	+	-6.86013198400444	2.37348507953389e-10	0.712485581026819
GGAAGTGTGGCTGAACGGCA	3722921	-	FALSE	glyQ	TRUE	3722430	3723341	-	-6.85190023265083	1.39095650448867e-06	0.712731473559022
AATCATAAGATATCTGGTGC	4484267	+	FALSE	lptF	TRUE	4484241	4485341	+	-6.85143863572319	1.11262290182338e-05	0.712745267052297
ATGTTTCGCTTTCTCGCCGT	3307391	+	TRUE	pnp	FALSE	3307055	3309190	-	-6.85107742285552	7.09837967359785e-56	0.712756061229737
TAACTGGGAAAACCCGACGC	3722963	-	FALSE	glyQ	TRUE	3722430	3723341	-	-6.84792062375444	1.12554722236309e-05	0.7128504102394
GATGACGACAGCCACACCTT	788597	+	TRUE	galK	FALSE	788054	789202	-	-6.84515649727851	1.15873519801971e-79	0.712933043737425
ATACCTGCACGATACCTTCG	1948426	+	TRUE	aspS	TRUE	1946774	1948546	-	-6.83867566147051	5.13673922665185e-47	0.713126863312982
GCGACGTGCACCGGAGTTGT	3446139	+	TRUE	rplN	TRUE	3445800	3446171	-	-6.83851879467866	2.37193014050661e-53	0.713131555967094
AACGCGTCGCGGGAAGGCAT	213132	-	TRUE	tilS	TRUE	212331	213629	+	-6.83533635362262	2.78392367357061e-36	0.713226771705122
CACGACACCGCCCACTTCAT	2528377	+	TRUE	zipA	TRUE	2528269	2529255	-	-6.83521590286702	3.93046224526447e-67	0.713230375981413
TGTTGCACATCGGGAAGCCG	3722462	+	TRUE	glyQ	TRUE	3722430	3723341	-	-6.83360353464238	4.96448159862599e-13	0.713278626762853
TTCTGGTGCCGGATCCGGCG	102098	+	FALSE	murC	TRUE	100765	102240	+	-6.83086533581537	1.55451458647971e-06	0.713360583446826
GCCAACCCTGAGCCATTAGA	99724	-	TRUE	murG	TRUE	99644	100711	+	-6.82840785579643	0.000101307074217317	0.713434154009775
ACTTCGCCCTGGAGCTTCGT	3334491	+	TRUE	murA	TRUE	3333257	3334516	-	-6.82655859857686	1.57555969947602e-11	0.713489525970208
ACACTGGAACCTTCGCGGCT	102665	-	TRUE	ddlB	FALSE	102233	103153	+	-6.82556138935644	8.31825700991723e-13	0.713519388785289
TACCCTTATTTATCCATCAC	192583	-	NA	NA	NA	NA	NA	NA	-6.82346631562806	1.7738953610083e-16	0.713582136821462
TTGGCTCCAGTACCGGTTTC	207141	-	TRUE	dnaE	TRUE	205126	208608	+	-6.8195407434541	7.67356197687372e-16	0.713699738508678
CGACCTTCAATCGGGAAGTT	2292472	+	TRUE	ccmF	FALSE	2290983	2292926	-	-6.81757346411811	6.57751299096239e-17	0.713758688541929
GATAGCAACCAAGATCCATC	3440256	+	TRUE	rpsM	FALSE	3440137	3440493	-	-6.81445633274943	1.99015241716524e-08	0.71385211413043
CACAGCCCGCCGTCCCTTCA	2638354	+	TRUE	hisS	TRUE	2637323	2638597	-	-6.81184008625199	5.91478898064072e-67	0.713930546250188
TAAAGCGGTTCACCCATTAA	673064	-	FALSE	leuS	TRUE	671424	674006	-	-6.8064021828848	1.77870776104093e-06	0.714093623614485
TTCAGCCTGCTGTTTGTTGA	4262353	-	TRUE	dnaB	TRUE	4262337	4263752	+	-6.80065159830874	1.41837931123775e-28	0.714266159049528
TTTCCATAGTAAGGGACATC	2819967	-	FALSE	alaS	TRUE	2817403	2820033	-	-6.79721839038277	8.05752494074468e-09	0.714369205724912
CGAGCAGAAAAGCCAGCGCC	91508	-	TRUE	ftsI	TRUE	91413	93179	+	-6.79545931875084	1.84360358850098e-06	0.714422015237335
CGCCTTCCAGCGCAGCAACG	191255	-	TRUE	tsf	TRUE	190857	191708	+	-6.78576171071854	1.98969355820532e-06	0.714713289687894
GAGCAACGTCAGCCAGGCAC	3861072	+	TRUE	glvC	FALSE	3860520	3861626	-	-6.77706803048947	3.97638386647458e-63	0.71497461243753
AGGCGGATAAGACGAAAATC	1262713	+	TRUE	lolB	TRUE	1262100	1262723	-	-6.77682901441271	1.41920032949925e-05	0.71498179970488
GCATTTTTTCGATATCTTCT	189485	+	TRUE	map	TRUE	188712	189506	-	-6.77564698983851	2.97416483808745e-09	0.715017345574892
CAGCCGTCTGGGGATCAGCA	2155488	+	FALSE	mdtB	FALSE	2153287	2156409	+	-6.77495068383125	0.00144942692883529	0.715038286559361
ATCGCCATGGAGCACAACCT	2928729	+	FALSE	sdaB	FALSE	2927598	2928965	+	-6.7725751167648	1.27771765741365e-88	0.715109739542324
ACGTTCAAACTCTTCCTGAT	2343995	-	TRUE	nrdA	TRUE	2342887	2345172	+	-6.77137113847963	1.19519642602024e-08	0.715145958597291
GGGAAACACCCCAGTCGCGC	672758	+	TRUE	leuS	TRUE	671424	674006	-	-6.76949962858974	2.05809066239867e-25	0.71520226616603
ACATCTTCACCTTCCTGAAT	2749603	-	TRUE	nadK	TRUE	2748853	2749731	+	-6.76867849190596	2.81879715732479e-12	0.715226974263171
AGGTTAGAACGAACCCGGAC	3649979	-	NA	NA	NA	NA	NA	NA	-6.76680299318189	2.35700499748678e-06	0.715283414638346
CTGATAAACACGCTCCAGAC	3912525	+	TRUE	glmU	TRUE	3911853	3913223	-	-6.76525979913125	1.51563389540708e-23	0.71532986147374
GACAGTTTGGGTATATGACC	343780	+	FALSE	yahL	FALSE	343400	344215	+	-6.76011647390005	1.71747868170886e-16	0.715484708110506
CCATTGAGCAAATTGCCTGC	2193740	-	TRUE	metG	TRUE	2192322	2194355	+	-6.76003621000014	1.1509221946145e-08	0.71548712509306
CCGCATAAACCCCTTTCACC	22063	-	TRUE	ribF	TRUE	21407	22348	+	-6.75898162629379	1.2894944341392e-23	0.715518883233038
AACCAGTGAATCCAGGCCGC	1263247	-	TRUE	hemA	TRUE	1262937	1264193	+	-6.75884723758955	3.68894509954575e-13	0.715522930468773
TAGTTTACCGTATCTGTGGG	4170029	-	NA	NA	NA	NA	NA	NA	-6.75616790730997	2.04912951156151e-20	0.715603630447862
ATCGCTTTGTGCTGCAGTGC	1794872	+	TRUE	pheT	TRUE	1793581	1795968	-	-6.75494678965874	3.92170385763499e-16	0.71564041589016
GCGCCGCACGCGCCTGCTTC	554757	-	TRUE	cysS	TRUE	553834	555219	+	-6.75184384535752	3.76760675217507e-14	0.715733907257174
ACGGGTAACGACCACTTTGT	3341607	-	TRUE	lptA	TRUE	3341402	3341959	+	-6.74924736856674	2.07252239348032e-12	0.715812157588636
TACAGACGTTCTGCTTCTTT	4184960	-	TRUE	rpoC	TRUE	4183373	4187596	+	-6.74825619416299	2.61588771982485e-34	0.715842033242777
AAACAACTTGCCCCAGAACT	770835	-	TRUE	cydA	TRUE	770681	772249	+	-6.74641880270408	1.74733788778006e-06	0.715897421891008
ATACTGCTGGAAGGCAGCAT	249762	+	NA	NA	NA	NA	NA	NA	-6.74374311257289	1.07035090979352e-08	0.715978096604241
AAATTCGAACTCTTCAACGT	4019309	-	TRUE	ubiB	TRUE	4018249	4019889	+	-6.74328934944981	1.85415883970354e-12	0.715991779816049
GACGCCAGGTGGTCCCTTGC	555189	-	TRUE	cysS	TRUE	553834	555219	+	-6.74318575287686	2.53987612485062e-29	0.715994903840576
CACGGTGAGCGTCGTAAGTA	2438970	+	TRUE	fabB	TRUE	2438407	2439627	-	-6.73806397074989	2.6455281227401e-06	0.716149388633692
GTCAGAGTAGATACGACCCG	2907416	+	TRUE	pyrG	TRUE	2906051	2907688	-	-6.73314947160244	1.85871548507823e-16	0.716297683977472
GAGCAAAGCGGCAGAAGGTT	3722138	-	FALSE	glyS	TRUE	3720351	3722420	-	-6.72737684615123	4.96677659464562e-05	0.716471951797636
AGATTCAACCATCAGTACAG	3308639	+	TRUE	pnp	FALSE	3307055	3309190	-	-6.72544774973018	2.64123554838315e-06	0.716530207536055
GACTGGTGTACTGCAATGGT	4389756	-	TRUE	orn	TRUE	4389627	4390172	+	-6.72050106946938	2.61962367653508e-23	0.716679632956012
TCTTTCACGCGGCCCGGACG	3821278	-	TRUE	spoT	TRUE	3820423	3822531	+	-6.71803639308617	2.12158707076207e-43	0.716754107222616
CTGGGTGACGATGACATTAC	3341565	-	TRUE	lptA	TRUE	3341402	3341959	+	-6.71170182634983	2.3638546721932e-69	0.716945587646881
TTGCAACAGCCAGGCAGAAA	1192940	+	TRUE	mnmA	FALSE	1191890	1192996	-	-6.71131468274984	2.97346759193022e-06	0.716957293488565
CGGAAGAGGGCGGTATTTTC	417477	+	FALSE	phoR	FALSE	417113	418408	+	-6.71067730656617	3.73992890236031e-12	0.716976566303832
TCGGTTTGCGCGGACCCTTA	3440169	+	TRUE	rpsM	FALSE	3440137	3440493	-	-6.7036243685978	1.70451298401679e-06	0.717189900398579
GTGTACTGCGCTTTGGTCAG	3884209	-	TRUE	yidC	TRUE	3883099	3884745	+	-6.70234440988262	2.45852003574631e-21	0.717228629625004
GTCACCGGTGGCGCTGACTT	3877225	+	TRUE	gyrB	TRUE	3875728	3878142	-	-6.70046097665757	3.97025154727511e-20	0.717285626500817
TAAACTGTGGCGGATAGGAT	1771853	-	TRUE	ydiB	FALSE	1771813	1772679	+	-6.69735928467785	6.6455704352596e-16	0.717379510340285
GTCATTCCGGCAACCATTCT	3721885	-	FALSE	glyS	TRUE	3720351	3722420	-	-6.69694938978798	7.90338970157148e-22	0.717391919118755
TCAACGGTTTTTCGTACTCG	3792399	-	TRUE	rfaD	FALSE	3792010	3792942	+	-6.69332895785903	9.79966043008316e-20	0.717501539367313
TTTTTCTTGCCAATCAGCAG	1176172	-	TRUE	lolD	TRUE	1175842	1176543	+	-6.68654859513754	3.39530580423656e-06	0.717706926854249
GCAGTCAGGATGGTCAGCAG	773090	-	TRUE	cydB	FALSE	772265	773404	+	-6.68578222072729	2.16190819567049e-08	0.717730148895965
TTACTCGCCTACTTTCGCCC	706958	-	TRUE	glnS	TRUE	705316	706980	+	-6.68456029097064	3.2442574261239e-61	0.717767177906232
GGAAACCGGACCTTTGTCAT	4479287	+	TRUE	valS	TRUE	4479005	4481860	-	-6.68357859365112	1.20413256333851e-27	0.717796929749341
TTTGTGAGACGGGCCATCAA	1861348	-	TRUE	gapA	FALSE	1860795	1861790	+	-6.68354553853783	4.12931493782515e-12	0.717797931578177
TAAATCGCTGCGGATTGCCC	1794032	+	TRUE	pheT	TRUE	1793581	1795968	-	-6.68223988532136	2.9756405526566e-08	0.717837505333981
TACCAGTTTAGCCTTTCGCC	3340521	-	TRUE	kdsC	FALSE	3340295	3340861	+	-6.67955429131677	1.87717651455289e-14	0.717918918188163
AGTGTACAATTATTACAATC	3882259	+	NA	NA	NA	NA	NA	NA	-6.67868508785081	3.57041166191838e-06	0.717945271746633
GCGATTGGAATGCGCAACGC	3268651	-	FALSE	garK	FALSE	3268647	3269873	-	-6.66974297541542	7.4379876915856e-53	0.718216501871484
TGCGGCGCTGATTGCGGTTG	492486	-	TRUE	dnaX	TRUE	491316	493247	+	-6.6677105088938	1.6315748717257e-25	0.718278178770683
GTTACGTAAATAAACCGGTT	1888653	+	TRUE	tsaB	TRUE	1888596	1889291	-	-6.6627634555576	3.96257002439599e-06	0.718428345528141
GCGATAGAAGCAGAAGCCAG	4018633	-	TRUE	ubiB	TRUE	4018249	4019889	+	-6.66187886564257	3.96301642129163e-06	0.718455203685633
GAACGTCGGAGCGTTCCGTG	3034265	+	TRUE	prfB	TRUE	3033206	3034304	-	-6.65858123231972	9.10402942939466e-27	0.718555345016906
AAGTACGGGAGGCTTTTTCC	2438985	+	TRUE	fabB	TRUE	2438407	2439627	-	-6.65752305827077	1.31864631731461e-18	0.718587485178704
TTGGATCTTCTTGATGATGT	3193381	+	TRUE	rfaE	FALSE	3193342	3194775	-	-6.65618222001063	4.01914977296813e-07	0.718628214895124
ATTAGCAACGCTATCAGTCT	3437857	+	TRUE	rplQ	TRUE	3437638	3438021	-	-6.65616190943555	3.72624927302859e-12	0.718628831890914
TGATCTCCTGTGACTCGACG	3164066	-	NA	NA	NA	NA	NA	NA	-6.65138467439116	9.85000753768888e-21	0.718773984442736
CACCACGCCACGTTGCAACG	92359	-	TRUE	ftsI	TRUE	91413	93179	+	-6.64651889617321	5.51909801306948e-52	0.71892188759975
GCGAGTCAGACTCACAGTCC	95152	-	TRUE	murF	TRUE	94650	96008	+	-6.62615355535656	6.67802696694513e-34	0.719541585987269
GGGCCGTTAGCCGGGTTATC	3883456	-	TRUE	yidC	TRUE	3883099	3884745	+	-6.62001404269979	7.60243340983902e-26	0.7197286152865
GCACATCGTGACCGTCCACC	438645	+	TRUE	dxs	TRUE	437539	439401	-	-6.61784541594408	0	0.719794701870795
AACCGCGCAGCATCTGCGGC	4253145	+	TRUE	plsB	TRUE	4252066	4254489	-	-6.61703104878823	3.63730188154483e-19	0.719819521974683
TGCCGCCTTCATAGTGGAAG	3877500	+	TRUE	gyrB	TRUE	3875728	3878142	-	-6.61633465976346	1.33107560297105e-15	0.719840747724663
TCCGGCGTTTCTTCTACGAC	3601980	+	TRUE	ftsY	TRUE	3600773	3602266	-	-6.6143675834471	1.12759131453901e-41	0.719900710443605
GGCAGCTGGTCGTCCGGGGT	672676	+	TRUE	leuS	TRUE	671424	674006	-	-6.60765676271098	1.17989256149374e-79	0.720105352719802
GGCGTCGCGCGGAAGATGAT	23624	-	TRUE	ileS	TRUE	22391	25207	+	-6.60510071981605	1.53184258060251e-11	0.720183328246882
GCCATTACTCCGCCCCCATC	1176525	-	TRUE	lolD	TRUE	1175842	1176543	+	-6.60358215721862	2.04094065247265e-71	0.720229662038859
GATCGCAGGTACGTCAACCG	3470673	+	TRUE	fusA	TRUE	3469422	3471536	-	-6.60094552793631	1.51747398402013e-49	0.720310124010803
TATCTGCCGCGTCGAGTCAC	3164081	+	NA	NA	NA	NA	NA	NA	-6.5969927924103	1.87217292386421e-09	0.720430783259291
GAGGTTCAGGTCATGACCAA	4125115	-	TRUE	rpmE	FALSE	4125036	4125248	+	-6.59599207312015	3.88072868956651e-08	0.720461337133856
AAACAGCGTGGCGGCATGGC	4566525	+	TRUE	mdtM	FALSE	4565310	4566542	-	-6.59234474613268	4.27466686572405e-28	0.720572718944635
GACGCCAGACTTTATGTTCC	4485934	-	TRUE	lptG	TRUE	4485341	4486423	+	-6.58965096305691	3.7931768932952e-37	0.720655003612526
CTGACCATCATGGGCACAGG	554558	-	TRUE	cysS	TRUE	553834	555219	+	-6.58945755410757	1.28583806099764e-12	0.720660912231949
AACTACAGTCAGAGCTGTGA	3443156	+	TRUE	rpsE	TRUE	3442748	3443251	-	-6.58456281962964	5.3630425615771e-06	0.720810478023818
GCACATGTTCTTTCAGAGCG	203425	-	TRUE	lpxB	TRUE	203348	204496	+	-6.58042131376633	7.42990231996089e-46	0.72093707630556
ACGACAAAGATCTCTCTACG	965872	+	FALSE	msbA	TRUE	965844	967592	+	-6.57670911052645	9.93523663967982e-08	0.72105058938908
CCCATCGGTACGCTACGCAG	4486235	-	TRUE	lptG	TRUE	4485341	4486423	+	-6.57031962424093	5.13304172404524e-29	0.721246053130155
GTCCGCTGACGATAAGTATG	208260	-	TRUE	dnaE	TRUE	205126	208608	+	-6.56815434490141	6.48521155811767e-34	0.721312316239039
GCACCAATGGCGGGGTGTCC	1403293	-	TRUE	abgR	FALSE	1402765	1403673	+	-6.56139856149907	2.45688566275796e-23	0.721519138841747
TTACTACCTGGCAGCCCATC	2743610	+	TRUE	rimM	FALSE	2743392	2743940	-	-6.55665560595872	1.1263955408999e-54	0.721664411296984
CCACGATTTTCGCGTCGGTT	3877050	+	TRUE	gyrB	TRUE	3875728	3878142	-	-6.55643955542853	1.02427637145355e-26	0.721671030123157
CTCAAGGAGCTCTAGTTCTT	1646217	-	TRUE	dicA	TRUE	1645958	1646365	+	-6.55324400349131	6.77209264377937e-06	0.721768941784838
GGTAGTCGTGGTTTTGCCGT	93515	-	TRUE	murE	TRUE	93166	94653	+	-6.55306506756117	9.82401879812911e-82	0.721774425164456
ACGCGGCAACATCTGACGCC	1796918	+	TRUE	pheS	TRUE	1795983	1796966	-	-6.55172481602257	4.65483205423139e-50	0.721815498983525
CAGTATGGATCCCCACAATG	2701273	+	TRUE	era	TRUE	2700503	2701408	-	-6.54940035427559	2.40551556397746e-52	0.721886746339743
GATTATTGTGCCTTAATGCC	2705175	+	NA	NA	NA	NA	NA	NA	-6.54646001853431	2.62676157663581e-41	0.721976891074865
AGATCGTCACCGATAACACC	91104	-	TRUE	ftsL	TRUE	91032	91397	+	-6.54424439409107	2.97070624400463e-16	0.722044832505498
GCGCGCTTACGTTCGGTAGT	3208923	-	TRUE	rpsU	TRUE	3208803	3209018	+	-6.54409241937225	8.1414344375076e-43	0.722049493231358
GCTGATATTCCGCCTTCAGA	3524348	+	NA	NA	NA	NA	NA	NA	-6.54371913892139	1.46434749233824e-67	0.722060941166104
GACCGACAAAATCGCCGGGC	4331700	-	FALSE	basR	FALSE	4331305	4331973	-	-6.54028771343758	7.37432587367758e-06	0.722166194693357
TGCATTGGCTGGCGTGATCT	185900	+	TRUE	dapD	FALSE	185123	185947	-	-6.53523046403581	2.59965270367296e-25	0.722321373737032
TTTGTTGAGATCGTCATAAC	4262962	-	TRUE	dnaB	TRUE	4262337	4263752	+	-6.51990236356411	1.72665369553698e-58	0.722792116107403
AAAATGCAGTACCCCGGTGT	2378736	+	NA	NA	NA	NA	NA	NA	-6.51896884704297	8.55728159058536e-06	0.722820805221544
ATCCACCGACAGCGTGGTCT	26770	-	TRUE	ispH	TRUE	26277	27227	+	-6.51778627091864	6.54988048441035e-53	0.722857151781402
ACGCACCCGACATTCGGGTT	432745	-	TRUE	ribD	TRUE	432679	433782	+	-6.5165386164572	1.34674827556181e-21	0.722895502491305
CACCTGAGCACGACGACCAC	1268028	-	TRUE	kdsA	TRUE	1267388	1268242	+	-6.51416864862627	1.01312223823672e-07	0.722968362353443
GTCGCCAGCTTTAGACGCGA	4424366	-	TRUE	rplI	FALSE	4424131	4424580	+	-6.51306859179609	1.96497505921621e-11	0.723002186364201
TTCTTCCAGACGCTCTTTCT	3034217	+	TRUE	prfB	TRUE	3033206	3034304	-	-6.50318919269656	5.62486504030562e-22	0.723306095212075
CGCTCCTTTACGCGAAAAAC	4485313	-	TRUE	lptF	TRUE	4484241	4485341	+	-6.50079084525558	9.39405910613719e-06	0.723379911422513
TCATCGAATAGACGCGACCA	2335657	+	TRUE	gyrA	TRUE	2334815	2337442	-	-6.49362391028037	1.05144867449637e-10	0.723600584776583
GGGTGGAGTCGACCAGTGCC	439371	+	TRUE	dxs	TRUE	437539	439401	-	-6.49351779191008	6.94980362471511e-62	0.723603853223458
GAGGCTTGCGGCAAAGGTCG	2699218	+	TRUE	pdxJ	FALSE	2699020	2699751	-	-6.49113562212579	2.22019151234064e-11	0.723677231848599
TTACCGCTGGTTACCCGCCA	2458457	-	FALSE	fadI	FALSE	2457181	2458491	-	-6.48427760877621	1.48504960998343e-32	0.723888564221665
GCAGGGATTCCTGAGAAGTA	218286	+	TRUE	proS	TRUE	217057	218775	-	-6.47864900062398	9.89855998634973e-08	0.724062104235563
AAGACCAGCAATGATGTTAC	4550179	-	TRUE	uxuA	FALSE	4549659	4550843	+	-6.47783197496073	2.68865061012783e-28	0.724087301507678
ACGCGGGTTGTGGACCTGGC	810908	+	FALSE	bioC	FALSE	810745	811500	+	-6.47671928816791	3.26853848553266e-25	0.724121619862272
GCGATAAATTCCAGCAGGCC	3403346	-	NA	NA	NA	NA	NA	NA	-6.47670486939438	8.29369759402471e-08	0.724122064598691
TTCAGTCAGCATACCGGAAA	3510821	+	TRUE	trpS	TRUE	3510656	3511660	-	-6.46946514294007	1.07554748231316e-05	0.72434543763405
TGGTTTCGTTGCCGGTAAAC	3211980	-	TRUE	rpoD	TRUE	3211069	3212910	+	-6.46826850690384	4.79792660129791e-06	0.724382371669175
TACCGGTGTAATGGGCGGGA	480594	-	FALSE	acrB	FALSE	480478	483627	-	-6.46647284193909	5.20329045082893e-11	0.724437801731232
CGGAAATGGTCGGCATACGC	706179	-	TRUE	glnS	TRUE	705316	706980	+	-6.46522756970408	1.19473893269247e-94	0.724476246799698
CGCCATGCCGACGGCAATAC	3163486	+	TRUE	parC	TRUE	3161737	3163995	-	-6.46504996887596	9.70908948964843e-60	0.72448173017099
CTGTCCAGCGCCGGAAATAA	974905	-	TRUE	mukE	TRUE	974872	975549	+	-6.4621515858273	1.14686769190572e-05	0.724571228593934
ATTCAGCCTCGCCGTTCTGA	491257	+	NA	NA	NA	NA	NA	NA	-6.45818251345525	1.22571659636543e-28	0.724693824436274
AACTTTGCCGTTGATAACAC	961543	-	TRUE	rpsA	TRUE	961218	962891	+	-6.45400880813636	2.77985308880783e-09	0.724822785693786
ATCCTGGCATTGGGTGAGCC	103407	+	FALSE	ftsQ	TRUE	103155	103985	+	-6.45157517008027	1.62908060656607e-14	0.72489800265906
CAGACGACGAGTCAGGTAAC	4185750	-	TRUE	rpoC	TRUE	4183373	4187596	+	-6.44788511863407	1.20367424844445e-05	0.725012081643562
AGTCGGTACGGCTGACCATC	788032	+	TRUE	galM	FALSE	787020	788060	-	-6.44579966338526	1.45504730545882e-31	0.725076569964406
AGCTGGATTCGCCTTTGCTA	4181175	-	TRUE	rpoB	TRUE	4179268	4183296	+	-6.43807523935019	5.10142792992999e-07	0.725315531518505
TACGACCTGGTCTGGAGCGA	3722779	-	FALSE	glyQ	TRUE	3722430	3723341	-	-6.4337982699039	3.36743980883504e-31	0.725447910927575
TAACCACGGTTTTCATTGGA	2819132	+	TRUE	alaS	TRUE	2817403	2820033	-	-6.43058893409601	1.10537822636127e-07	0.725547277015378
GCGTCAATGCCGCTTCGAGC	1336977	+	TRUE	ribA	TRUE	1336594	1337184	-	-6.42795639395574	3.94110733780254e-19	0.725628804925806
GCTCACGGCGTACTTTAGTC	4183651	-	TRUE	rpoC	TRUE	4183373	4187596	+	-6.42713778391528	2.64255400051268e-10	0.725654160435764
TCGATAGCCAGAATTCGCAT	1889293	+	NA	NA	NA	NA	NA	NA	-6.42474099998049	4.57721393764134e-11	0.725728408267744
CTGGCGGCAGCGCCGAAACG	1436846	+	TRUE	ydbK	FALSE	1435284	1438808	-	-6.42380471949317	1.23575019852947e-07	0.725757416593073
CAAGTTGCTGGTCGGCACCC	439611	+	TRUE	ispA	TRUE	439426	440325	-	-6.4225731582677	4.99389914777577e-71	0.725795576990197
AGGTACATGCTGGTTAAGGT	4253059	+	TRUE	plsB	TRUE	4252066	4254489	-	-6.42160272082611	3.83842569379324e-10	0.725825649193677
GGACTTCGGTACGCGCTTCA	4175596	-	TRUE	secE	TRUE	4175381	4175764	+	-6.41902445048726	8.05267172588596e-38	0.725905557506957
GACATGACCCTTTTAGCACT	1262955	+	FALSE	hemA	TRUE	1262937	1264193	+	-6.41604986649369	1.68428949243393e-14	0.725997770628491
TTTGCCGTAAGCAACGTTAA	23087	+	FALSE	ileS	TRUE	22391	25207	+	-6.41390265543916	4.95946648123277e-21	0.726064349466782
CTGCAAGCAATTCAAGGATC	926885	+	TRUE	cydC	TRUE	926697	928418	-	-6.41103133320262	1.35388371965402e-05	0.726153399995232
CTGTGCGTAAATGTGACGCG	3443527	+	TRUE	rplR	TRUE	3443266	3443619	-	-6.40835797023511	1.13420631732622e-23	0.726236330699332
GAAGCGTTCCAGACGTGAAA	987321	+	TRUE	asnS	TRUE	986808	988208	-	-6.40825833236843	1.46619070124344e-05	0.726239421943356
GCGAGTCTTGCAGCAGCCAC	297352	-	FALSE	paoD	FALSE	296994	297950	-	-6.40171053119238	1.37927148057474e-36	0.726442623813354
GCGTTAACAGCGTAGCGCCG	3194217	+	TRUE	rfaE	FALSE	3193342	3194775	-	-6.40037682428719	7.06188044205202e-18	0.726484027486077
GAGAGGGCCACCTTCTCTTT	92664	+	FALSE	ftsI	TRUE	91413	93179	+	-6.39878865234808	1.34495416639588e-07	0.726533336942382
GAACGCCAAGGCCTGGTCCC	2629348	+	TRUE	guaA	FALSE	2628980	2630557	-	-6.39779283775422	2.0702744231656e-39	0.726564258341887
GGAACCGGTGCGCCGATCAG	2507916	-	TRUE	yfeO	FALSE	2507652	2508908	+	-6.397779243999	2.86382036613443e-27	0.726564680464712
ATTGGTGGTGCCGGTATGGG	100864	+	FALSE	murC	TRUE	100765	102240	+	-6.39725672660251	5.30475378002123e-13	0.72658090641332
GCCGAAGCGGGGTTCAAAAT	3980832	-	TRUE	proM	FALSE	3980758	3980834	+	-6.39671051575717	1.60588574197626e-05	0.726597868899172
CGTGCCAAGGGTGGCAACAA	1601392	-	TRUE	lsrC	FALSE	1601043	1602071	+	-6.39565404222439	2.37954970905287e-16	0.726630679754388
AGATGGTTCAGCGTACCTTC	28617	-	TRUE	dapB	FALSE	28374	29195	+	-6.38531316020732	3.97950699106987e-50	0.726951992626182
ATGGTCAGCGTGCTTTGCGG	3161918	+	TRUE	parC	TRUE	3161737	3163995	-	-6.37876017518861	2.00909926884881e-07	0.727155754736804
GTGCTACGTCTTTACGTTTC	3309499	+	TRUE	rpsO	FALSE	3309437	3309706	-	-6.37777185138076	9.24868460694007e-86	0.727186496132904
ACCAATCGGCAGGGTGTGAA	2021374	-	TRUE	fliR	FALSE	2020917	2021702	+	-6.37495417662579	1.08712538851798e-05	0.727274152990617
AGCATCAAGCGTTGCGCCCA	95533	-	TRUE	murF	TRUE	94650	96008	+	-6.37221565541263	4.81720266399466e-21	0.72735936766282
CATTAAGTTCAGTGCCTCAA	3340156	-	TRUE	kdsD	FALSE	3339288	3340274	+	-6.36988904771253	4.43647187422265e-10	0.72743178049722
GCCATTGAGATCGTCAATTT	2870678	+	TRUE	ftsB	TRUE	2870531	2870842	-	-6.36573211774078	7.17226274076294e-40	0.72756119578605
CTGACAACATTAAGTTCTCA	2707683	+	TRUE	rpoE	TRUE	2707459	2708034	-	-6.36494835500342	1.83363135477594e-17	0.727585601376242
CTGCTGCTGTTTATGACCAG	2749510	-	TRUE	nadK	TRUE	2748853	2749731	+	-6.36465973610764	6.6314915403235e-12	0.727594589093385
GGTTTGGGGAGACTTTACCT	2708035	-	NA	NA	NA	NA	NA	NA	-6.36171642299952	1.31041933874576e-17	0.727686257815524
TCTTTCGCGATGACCGCTTC	4479102	+	TRUE	valS	TRUE	4479005	4481860	-	-6.35004083881352	8.37608047389073e-35	0.728050118513789
CTTTGTGCAGTTTGTTGATC	4423287	-	TRUE	rpsF	FALSE	4423141	4423536	+	-6.34706705637947	1.9730213267969e-106	0.728142852331203
CACGGAGGTCTGTCGCTCTG	3314007	+	TRUE	infB	TRUE	3311364	3314036	-	-6.34610074281653	5.62930970887291e-81	0.728172990739398
TGCCATTCACTTTTGGATCA	4170733	-	TRUE	murB	TRUE	4170080	4171108	+	-6.34404097840902	8.26456370142728e-41	0.728237241175311
GGCGCTCATTACGGTCACGG	1141745	+	TRUE	rne	TRUE	1140405	1143590	-	-6.34283200115998	3.24580056304908e-41	0.728274958203667
AATGTATGGCTGCCAGTGTG	3525362	-	TRUE	yrfF	TRUE	3524491	3526626	+	-6.33781616374281	5.31967244765002e-33	0.728431481365891
CAGGCAGGCGACAACCCTTC	667625	+	TRUE	rlmH	FALSE	667471	667938	-	-6.33702459717936	1.17793566035077e-20	0.728456188971696
GATTATTCAGCCTCCTGTCT	4423102	-	NA	NA	NA	NA	NA	NA	-6.33149963825213	1.92588560974781e-10	0.728628689264723
GTACGTGATACACCGAACCA	1364056	-	TRUE	puuE	FALSE	1363574	1364839	+	-6.33038563171763	2.44254623197866e-20	0.728663480679399
CTTCCTGCTCTTGCTGTTCC	3820335	-	TRUE	rpoZ	FALSE	3820129	3820404	+	-6.33011198701289	6.31132757466169e-70	0.728672027355177
GCTGGAAGCCAATACCTCAC	103057	+	FALSE	ddlB	FALSE	102233	103153	+	-6.32976017611578	4.56630128003924e-87	0.728683015670432
TTGGTCAGCCCGTTCCACAC	289159	+	TRUE	argF	FALSE	288525	289529	-	-6.32968929246246	0	0.728685229661095
GATGTTCATGTGTTTCGGAC	13034	-	TRUE	dnaK	FALSE	12163	14079	+	-6.32880287700088	2.28307444647556e-16	0.728712917230732
TCGCCTGGGGATAGCGCGCC	3793023	-	TRUE	waaF	FALSE	3792952	3793998	+	-6.32754434986302	1.30179280094456e-11	0.728752231483801
GCCGGTGCCTTTTTCCATGT	4481060	+	TRUE	valS	TRUE	4479005	4481860	-	-6.32667823401375	1.16774894156567e-65	0.72877928993814
TCCGGTTTCGCTTCTGCTTT	1141804	+	TRUE	rne	TRUE	1140405	1143590	-	-6.32360877724167	9.34227714255299e-14	0.728875199475477
ACGTAAGATTGGTCTCCACG	3976950	-	TRUE	rffT	TRUE	3976624	3977976	+	-6.32316699628219	1.21534463461287e-53	0.728889005627318
CAGAACTTCCCCTACTAAAG	104043	-	TRUE	ftsA	TRUE	103982	105244	+	-6.318711520148	2.40405743343579e-05	0.729028273509518
GCCGCCATCGGGTAAGTGTC	987892	+	TRUE	asnS	TRUE	986808	988208	-	-6.31648799307173	3.23301436954e-10	0.729097795733705
ATGACATGAATGGTTCATCC	151099	-	FALSE	yadK	FALSE	151003	151599	-	-6.31371606376658	4.18600930318552e-32	0.729184483224485
CGAGCCACCCACTTTCTTGT	24873	-	TRUE	ileS	TRUE	22391	25207	+	-6.31115027536749	2.79119464669714e-73	0.729264742373679
TTATCAAACAACGCACGCAG	670026	+	TRUE	holA	TRUE	669797	670828	-	-6.30932028443416	4.18065584048164e-08	0.729321996203918
TAAAGTGTTCCTGAAGCCAG	3325653	+	TRUE	rlmE	FALSE	3325057	3325686	-	-6.30894349253033	1.4103980598996e-10	0.729333785782607
GATCACTGGCTCCCAGCGTC	3493841	+	FALSE	nirB	FALSE	3492033	3494576	+	-6.29103840697151	2.98439289906964e-16	0.729894464255039
CTGCTCTGCCAGCCACGGGT	2851358	-	TRUE	hypE	FALSE	2851318	2852286	+	-6.28997069542135	2.20256295760193e-86	0.729927925729081
CTTGTCGTTTCAGTAGCAAC	1820437	+	NA	NA	NA	NA	NA	NA	-6.28945823482767	4.49836552494929e-24	0.729943987042934
CCGATGAAGCCCATCACACG	4176024	-	TRUE	nusG	TRUE	4175766	4176311	+	-6.28797287198085	4.03447249631983e-26	0.729990544623732
GATGGCGCTCGATCTGGCTG	3209440	-	TRUE	dnaG	TRUE	3209129	3210874	+	-6.28632866625643	2.07360805533068e-54	0.730042087941249
CAGCTTTACCCTGCGGTACC	4424217	-	TRUE	rplI	FALSE	4424131	4424580	+	-6.28497277527918	3.37571758050485e-94	0.73008459851189
AATTAATGCTTCGACGGTGT	2701747	+	TRUE	rnc	FALSE	2701405	2702085	-	-6.28266517308167	3.33526915152571e-10	0.730156958991731
GGAACGGAATGTATTCGATC	3792780	-	TRUE	rfaD	FALSE	3792010	3792942	+	-6.27653080802519	7.0772167165055e-08	0.730349386693777
TTTTTTCAGCGCCTTCGGCG	492790	-	TRUE	dnaX	TRUE	491316	493247	+	-6.2752939777996	5.17094133334202e-06	0.730388196867241
TCGGTTTCAGGAAGCCGCGC	98924	-	TRUE	ftsW	TRUE	98403	99647	+	-6.27223867545581	4.30398971629083e-25	0.73048408608533
CTTGACGGTGCAAGGGATAT	1192052	+	TRUE	mnmA	FALSE	1191890	1192996	-	-6.26934577205457	3.43330127744061e-15	0.730574901698192
CAGCACGCTTCATAGCACGA	3447515	+	TRUE	rpsC	TRUE	3447204	3447905	-	-6.26536050571912	5.83587891223224e-23	0.730700046355226
ACCAGGCATATTCGGCAGAC	3441709	+	TRUE	secY	TRUE	3440788	3442119	-	-6.26022864560921	0.00200221633198797	0.730861259319953
TAAGGCGTTCACGCTGCATC	2345270	-	NA	NA	NA	NA	NA	NA	-6.25918219423134	1.03195562784976e-08	0.730894141420685
GCAAAGCCGATTAACGCTTT	2431287	+	TRUE	accD	TRUE	2431034	2431948	-	-6.25587287132752	1.30098151025176e-19	0.730998148040254
CGAATCGACGCCTGCGTTGA	3524992	-	TRUE	yrfF	TRUE	3524491	3526626	+	-6.25064516071112	6.11081555902838e-41	0.731162506781814
TTATCGGCCTGGGCCTCACC	97139	+	FALSE	murD	TRUE	97087	98403	+	-6.24794391528972	7.79975862256473e-48	0.731247462654942
GCTCGGTTCCACGTTTGAGT	2702780	+	TRUE	lepB	TRUE	2702357	2703331	-	-6.24711089311332	5.23177988656395e-16	0.731273665711125
GCCCTTCCAGCGGCAGAACC	3082418	+	TRUE	speA	FALSE	3081957	3083933	-	-6.24703597386089	1.73249453368213e-17	0.731276022419155
ACGGCGCATCTGACGGGTAA	4481489	+	TRUE	valS	TRUE	4479005	4481860	-	-6.24499575736526	6.79685253371233e-07	0.73134020661688
TTCCGCCAGTTCTTTGGTGC	90626	-	TRUE	rsmH	FALSE	90094	91035	+	-6.24371943974294	1.77774587691824e-121	0.731380364664564
CGGGCTACTCGGACCATACA	3793805	-	TRUE	waaF	FALSE	3792952	3793998	+	-6.24322919937253	4.62411599602027e-15	0.731395790756085
CGTGCTCAACGATACCCGCC	640094	-	TRUE	ahpF	FALSE	638976	640541	+	-6.24178432931997	1.22887098742337e-17	0.731441259376723
GTTCTTCCAGCAGGCGGGAC	434567	-	TRUE	nusB	FALSE	434361	434780	+	-6.24138974261366	7.81671119833685e-20	0.73145367760991
TTCACCGCCGCGCCTTCCGC	673753	+	TRUE	leuS	TRUE	671424	674006	-	-6.23904075872984	2.89955729465063e-174	0.731527612369882
AACAGACCGGCGTATACCTG	2704269	+	TRUE	lepA	FALSE	2703347	2705146	-	-6.23668533618331	3.48521645346383e-18	0.731601764797676
GAAAACCGGAGTAGAGCATC	2525252	-	TRUE	yfeH	FALSE	2524968	2525966	+	-6.23429357449194	3.64838155548554e-07	0.731677076623653
ACGGATTTCAACCACTTCTT	4175902	-	TRUE	nusG	TRUE	4175766	4176311	+	-6.23425445735411	1.16042296880186e-28	0.731678308473511
GGTGACCGCAGCTTTGTTCG	3444511	+	TRUE	rpsH	TRUE	3444175	3444567	-	-6.23334021296589	2.79538381282382e-107	0.731707100407059
CGGGGCCACCAGCTGAGTGT	3912009	+	TRUE	glmU	TRUE	3911853	3913223	-	-6.23069160416612	8.25560096760417e-34	0.731790524779352
CAATATTTTTCGCCCCGTCA	440606	+	NA	NA	NA	NA	NA	NA	-6.22506848609871	1.93523434455046e-18	0.731967701631334
CCTCAACGGCCAGAATGCCA	3340142	-	TRUE	kdsD	FALSE	3339288	3340274	+	-6.22050544635385	1.60858090664272e-16	0.73211153991781
AGGGGTTATTGATCCTGAAC	918745	+	FALSE	macA	FALSE	918458	919573	+	-6.21977018055354	3.79006476886835e-05	0.732134722601063
CGTAAATGGACCGATCAATC	4272427	+	FALSE	ssb	TRUE	4272148	4272684	+	-6.21782182412975	6.75068085347837e-30	0.732196160723927
GCTGACCGATGGCGCGGCAG	2457648	-	FALSE	fadI	FALSE	2457181	2458491	-	-6.21772839583759	9.21863630809122e-26	0.732199107086105
AAGGTCACCCACTGCGTTAA	197302	-	TRUE	rseP	TRUE	196546	197898	+	-6.21462146726866	6.81896878044103e-19	0.732297100944294
TTTTCGATAACCAGTTTCAC	706360	-	TRUE	glnS	TRUE	705316	706980	+	-6.20911181227417	2.33176178905676e-16	0.732470942339531
CAAAGGCAACTTAGGGTTTA	3331668	-	NA	NA	NA	NA	NA	NA	-6.20834031833524	3.98061531614168e-05	0.732495291210872
CTTCTTTGATTACGCGATAA	3821001	-	TRUE	spoT	TRUE	3820423	3822531	+	-6.20761440539372	2.90877181611372e-15	0.732518202993282
TCATGTTCCACGCCTTCAAC	1261934	+	TRUE	ispE	TRUE	1261249	1262100	-	-6.20085595101508	1.13351670077262e-224	0.73273158696786
CAGCACGGATGCCTTGCGCC	108175	-	TRUE	secM	TRUE	107705	108217	+	-6.19899604213536	4.7373287075852e-29	0.732790331492088
ATTCGGCGGCGACCCCGGCG	600732	-	TRUE	cusA	FALSE	597937	601080	+	-6.19889540075351	1.21339214294071e-15	0.732793510481013
GCGTTGAGCACCTTTAGAGA	665255	+	TRUE	mrdB	TRUE	664424	665536	-	-6.19850060557697	1.76689940684153e-07	0.732805981258684
GTCGTCCGGGGTCGGCATTA	672684	+	TRUE	leuS	TRUE	671424	674006	-	-6.19184636662289	3.74282508176841e-13	0.733016239037611
GCTTCAGGTGTGGGGGCATC	497324	-	TRUE	hemH	TRUE	497279	498241	+	-6.18121457113634	7.58520987479106e-28	0.733352428442953
CTACGCGGGCAGCACCAATC	3308749	+	TRUE	pnp	FALSE	3307055	3309190	-	-6.17506389268478	1.96321771517023e-18	0.733547060699412
ATTACTGCCGTTGGCGCGAC	492444	-	TRUE	dnaX	TRUE	491316	493247	+	-6.16773846344667	3.03465557303072e-60	0.733779001641531
TCGGTCAGGTTAGTTTTCAC	667043	+	TRUE	mrdA	TRUE	665539	667440	-	-6.16217195821006	1.13693188250602e-29	0.733955348862445
ATTCAAGCTCTTTGCCTTCC	961655	-	TRUE	rpsA	TRUE	961218	962891	+	-6.16197515925404	3.89209162978018e-17	0.733961585016548
GCATCGATGGAAACCCGCCA	1731199	-	TRUE	lhr	FALSE	1727111	1731727	+	-6.14981770245476	1.8862936352291e-60	0.734347035406562
GTTGAGATCTTCACGGATGC	706304	-	TRUE	glnS	TRUE	705316	706980	+	-6.14547500087855	2.1659641099762e-65	0.734484818278939
AGCCGCGCGAACCTCTGCAA	3309335	+	FALSE	psrO	FALSE	3309247	3309420	+	-6.14268405880183	1.62771929121532e-36	0.734573395065401
ATACCATCACGCTGGTTGGG	4480363	+	TRUE	valS	TRUE	4479005	4481860	-	-6.1426617097328	2.3415566837274e-08	0.734574104449297
GTCGAAGTTACCACCCGTTT	1015562	+	TRUE	fabA	TRUE	1015175	1015693	-	-6.14196398128996	9.65670381238013e-80	0.734596251802324
TCGTTTTGCAGGATCTTGAT	3881874	-	NA	NA	NA	NA	NA	NA	-6.1419558457779	2.56436570233065e-30	0.734596510048287
TACGGCAGCCAGACGTTGAC	4253893	+	TRUE	plsB	TRUE	4252066	4254489	-	-6.13906429096728	7.25048877133312e-26	0.734688308318337
CACTTCATTTGCCACTCGCT	100668	-	TRUE	murG	TRUE	99644	100711	+	-6.13879757023238	1.04792889866466e-16	0.734696777064603
ACTTGGCGTTGGGCCGTTAC	2793827	+	FALSE	csiR	FALSE	2793696	2794358	+	-6.13617156989013	1.10319153869309e-12	0.734780166573632
GCTCACTTCGTGTTCGCCAG	4424501	-	TRUE	rplI	FALSE	4424131	4424580	+	-6.13582821434691	2.54331209093148e-179	0.734791071341808
GCGATGTTCGCGGAACGGTT	3449133	+	TRUE	rplB	TRUE	3448565	3449386	-	-6.13120369916878	1.31213533227538e-13	0.734937974741492
CATCGACGCCTGGGGGAACA	131767	-	TRUE	acnB	FALSE	131615	134212	+	-6.12988945822315	8.81559112106452e-07	0.734979733937126
GGTTTGATGGGGCCACTGGC	1902267	+	FALSE	manZ	FALSE	1901919	1902770	+	-6.12728619872706	7.84868218006784e-13	0.735062464913661
GATCTCTTTACGTTCAACTT	673464	+	TRUE	leuS	TRUE	671424	674006	-	-6.11983217515317	3.2724973923386e-42	0.735299455082977
GTGCAGTTCTTTGCGTGGCC	200425	-	NA	NA	NA	NA	NA	NA	-6.11768524981301	1.14579825867417e-32	0.735367741895245
ATCAGTGCCTACCCGTTATC	89702	+	FALSE	mraZ	FALSE	89634	90092	+	-6.11731118020261	1.25241352993714e-38	0.735379641147825
GCTTCGGCGCGCAGTATAGA	3268631	+	NA	NA	NA	NA	NA	NA	-6.11400822071769	1.19786330883618e-09	0.735484725871234
CGCGTGCTGGATTGCTTCGA	3312600	+	TRUE	infB	TRUE	3311364	3314036	-	-6.11297998399862	4.78407331278296e-38	0.735517445685035
ACATATTACGGGTAATCGTC	192768	-	NA	NA	NA	NA	NA	NA	-6.11270279199759	1.57818711397071e-24	0.735526266788927
AGTGCTCGCGAAGGTGCGTC	93208	-	TRUE	murE	TRUE	93166	94653	+	-6.1116952397334	3.35830309606246e-13	0.735558331990021
CCGGGAGGGACTCAATAGTT	2707638	+	TRUE	rpoE	TRUE	2707459	2708034	-	-6.11109908891104	8.58834772262197e-07	0.735577305717874
CCTGAAGCCACACTGGTAAC	1309545	-	TRUE	tonB	FALSE	1309113	1309832	+	-6.10783581740047	7.72896308898413e-07	0.735681183401814
TGTAGTTATCTATCCAGTTT	690125	+	NA	NA	NA	NA	NA	NA	-6.10719095265123	4.8944398527759e-18	0.735701714450474
CCACCGCAGGCGGTGGTCAC	1374217	-	TRUE	ycjR	FALSE	1374058	1374846	+	-6.1064348413769	2.16621415812114e-11	0.735725788798796
TGAAAATCCGCCCATCGGTC	3366808	+	FALSE	yhcG	FALSE	3365849	3366976	+	-6.10445453587844	7.83563946100441e-21	0.735788848579006
CGTAAGGCATATCTTCGATC	4182507	-	TRUE	rpoB	TRUE	4179268	4183296	+	-6.10431663484474	1.66569576971312e-30	0.735793240227736
CAGTGAGACGGTACGCTCAC	1149533	-	TRUE	fabD	TRUE	1148951	1149880	+	-6.10393371348614	1.90705552051775e-24	0.735805435161755
CCATGGTTTCACCAGTACCC	3329482	+	TRUE	obgE	TRUE	3328604	3329776	-	-6.1012249927693	1.74269870315795e-21	0.735891711600619
TTATAAGGTCAGATATGCCG	194827	+	NA	NA	NA	NA	NA	NA	-6.10070132308545	6.33043077733275e-12	0.735908393526184
CAGCACCATCAGGCTCTCTT	1339582	-	TRUE	lapB	FALSE	1338582	1339751	+	-6.0975281599456	2.91352859494638e-44	0.736009493408927
ATTTTTCAGCCTGGATACGC	2817024	+	TRUE	csrA	TRUE	2816983	2817168	-	-6.09709869957623	0.000151242291316998	0.736023178543715
CATGCCGCGCTCGGAGATGT	3398258	+	TRUE	mreB	TRUE	3398066	3399109	-	-6.09600231576807	6.02559466344549e-29	0.736058118092315
TATCGGCCATTTCAGCTTCC	2282589	+	FALSE	yejM	TRUE	2282398	2284158	+	-6.09267485783857	1.31979377861539e-39	0.736164177803314
AACTGGCGACCACCGACGCT	4040756	-	TRUE	rdoA	FALSE	4040438	4041424	+	-6.08498378136304	3.00992678537936e-27	0.736409440916499
GGTTTACCAGATCTTCAACC	13083	-	TRUE	dnaK	FALSE	12163	14079	+	-6.08470643176318	6.26403847525801e-21	0.736418288456509
TTATGCGTCGCGATTCAGCC	3792920	-	TRUE	rfaD	FALSE	3792010	3792942	+	-6.0845684047752	1.9072584877201e-93	0.736422691640335
CATGAGAGAGTGAATTTCAG	3525577	-	TRUE	yrfF	TRUE	3524491	3526626	+	-6.08427948581488	7.26730434099209e-05	0.736431908582912
TGTGCCTGCCAGAGTGCAAG	3988749	+	TRUE	hemC	TRUE	3987848	3988789	-	-6.08389784956819	5.53325884920227e-27	0.73644408369785
CGAAGAGGACGACGACGAAG	3268594	+	TRUE	rnpB	FALSE	3268238	3268614	-	-6.08294504933469	7.03391954286334e-05	0.736474482076107
CGCTGCACGCTGTTCGCTTC	669650	+	TRUE	nadD	TRUE	669154	669795	-	-6.08269026080424	5.29829745437871e-154	0.736482611338722
GATTGCAGCGGCGTACGCCG	4017067	+	FALSE	ubiE	FALSE	4016878	4017633	+	-6.08214931855234	9.58794521395715e-12	0.736499871194239
AGCAGCCCACGGGAAGGTGG	129038	-	TRUE	lpd	FALSE	127912	129336	+	-6.08026402576557	1.53391864241311e-09	0.736560031593318
AGATAGGCGACGTTCATCCC	1354257	+	TRUE	sapA	FALSE	1353491	1355134	-	-6.07237150227102	9.13121065747407e-30	0.736811991707341
GTGATCTTCGCGCCGATTAT	2919611	-	FALSE	gudP	FALSE	2918770	2920122	-	-6.07060389876847	2.53397593983401e-97	0.736868444128915
GCGTTGGGAAGTGGTAGCGC	2819854	+	TRUE	alaS	TRUE	2817403	2820033	-	-6.06949384805811	3.06136804701334e-19	0.736903900534904
ACCAGTTTTGCGTCCAGTTC	3447580	+	TRUE	rpsC	TRUE	3447204	3447905	-	-6.06455455386477	1.19806091835991e-96	0.737061709138945
GATGAAGTCGGACGGAATAG	2630114	+	TRUE	guaA	FALSE	2628980	2630557	-	-6.06321805068515	2.81186671704878e-06	0.737104421535614
TACCTTCCATCACTTCATCC	1265218	-	TRUE	prfA	TRUE	1264235	1265317	+	-6.06290766896872	7.79646290124444e-83	0.737114341522236
CGCCCAGCTGTTTCAGGCCC	961985	-	TRUE	rpsA	TRUE	961218	962891	+	-6.0627230355138	2.14084133323309e-78	0.737120242645331
ATCCTGACTTGAAATTCGGT	4124861	+	NA	NA	NA	NA	NA	NA	-6.06233526249895	1.8399583474103e-29	0.737132636678092
TTTACAGGCCACCGAAGCCG	3509580	-	FALSE	yhfZ	FALSE	3509461	3510366	-	-6.06030806993674	9.63751648112552e-11	0.737197436757688
CGGCCACAGGCCAAACAACC	3009161	-	TRUE	hyuA	FALSE	3008050	3009435	+	-6.05928938362403	0.00179221849857673	0.73723000380371
ATCGGCATGGTTAAGGATAT	4158562	+	TRUE	sthA	FALSE	4157413	4158813	-	-6.05794383049656	2.14520126316146e-27	0.737273025078485
GCCGTTAATATCCACCGGCA	4550857	+	NA	NA	NA	NA	NA	NA	-6.05222923349299	4.09625981289722e-27	0.737455793442328
TCGAGCTTCGTATGGGGTAT	3809745	+	NA	NA	NA	NA	NA	NA	-6.05212130654907	2.25846904739473e-14	0.737459246111564
GTTGGACGCCGCAGCCAGGG	3311838	+	TRUE	infB	TRUE	3311364	3314036	-	-6.05142041689848	1.18708240477619e-22	0.737481668918661
GTGCTGCGTAACCTCGGCGT	1190164	-	FALSE	purB	TRUE	1189839	1191209	-	-6.048565476304	2.15101304357399e-143	0.737573018046504
CAGCTCAATATGGCCCATAG	3810965	-	TRUE	dfp	TRUE	3810754	3811974	+	-6.04550708355142	2.15028211541281e-09	0.737670902114089
ATCGCGGTACCGCGAACGGT	3448734	+	TRUE	rplB	TRUE	3448565	3449386	-	-6.04111125817816	2.02648643445295e-14	0.737811636318802
CGTACATTTTCCCTGCGAAA	3882194	+	NA	NA	NA	NA	NA	NA	-6.03712129414242	2.59647191861249e-09	0.737939423200525
GTCGGTATAAGGCATCAGCC	498000	-	TRUE	hemH	TRUE	497279	498241	+	-6.03616590291212	8.55646339066337e-18	0.73797002815694
GTTGCTGGCGCTGGTCACCT	3066608	-	FALSE	argO	FALSE	3066195	3066830	-	-6.03554908032914	2.7699011400644e-25	0.737989788770301
CCTTAATGACCGATATCCAC	4202725	-	FALSE	purD	FALSE	4202665	4203954	-	-6.03210685320351	5.69304198006548e-54	0.738100083867729
ATCTCGCAGGCTGCCTTCAG	491941	-	TRUE	dnaX	TRUE	491316	493247	+	-6.03027501052006	4.25211166912595e-18	0.738158792816609
AGCCCCCGGGGTGTCGATAA	209096	-	TRUE	accA	TRUE	208621	209580	+	-6.02864376690479	1.90597195465277e-06	0.738211080603507
AAATCGGTGATCGCCAGTGC	205234	-	TRUE	dnaE	TRUE	205126	208608	+	-6.02763423892434	5.93735750009246e-23	0.738243443664932
TGCATGAATGGCGTCCCGCA	2743164	+	TRUE	trmD	TRUE	2742594	2743361	-	-6.02763178433764	2.37332887957952e-98	0.73824352235659
GCGCACTTTGCGATGGAAGT	4593796	+	TRUE	lgoR	FALSE	4592960	4593874	-	-6.02698870834524	2.20263104360925e-27	0.738264139324436
GCCATCTGATCGTAAGTAGT	194802	+	NA	NA	NA	NA	NA	NA	-6.02402758514367	1.02229060261519e-11	0.738359087572033
GGTAATGGAAAGCCTGGATC	60408	-	FALSE	hepA	FALSE	60358	63264	-	-6.02106536600314	4.03681157882021e-11	0.738454095400169
TGGATTGCTTCGATGGTCTG	3312607	+	TRUE	infB	TRUE	3311364	3314036	-	-6.02035431975098	1.86067509450313e-65	0.738476904563296
TCAACGGTACGTACCGGCTC	56817	+	TRUE	lptD	TRUE	54755	57109	-	-6.01749710080424	6.93581981693944e-19	0.738568573531221
AGCAGTGCGGTGGAGAACTT	1115792	+	TRUE	lpxL	FALSE	1114885	1115805	-	-6.0157740104383	7.2769763678917e-15	0.738623866931002
CCGCGAGCAAGGCTACGCCC	287819	-	FALSE	yagI	FALSE	287628	288386	-	-6.01481908862036	7.9539834240624e-31	0.738654513621861
GTAGCTGACGTATTGCAGCT	4179464	-	TRUE	rpoB	TRUE	4179268	4183296	+	-6.01262294922383	8.7412527716166e-49	0.738725004859708
TCTCAGCAAGCTCTTGTACG	217314	+	TRUE	proS	TRUE	217057	218775	-	-6.01217714553829	1.85745662181483e-19	0.738739315818974
TTGGGGAACCATCGGTACGG	2518178	+	TRUE	gltX	TRUE	2517279	2518694	-	-6.00958612486941	3.75761818176409e-16	0.73882250240155
CAGACGGCGGAAAATCGGCC	4253470	+	TRUE	plsB	TRUE	4252066	4254489	-	-6.00896366019533	2.62753150620032e-06	0.738842489868824
TCTTTGCCTTCTACTTTCGG	496813	-	TRUE	adk	TRUE	496399	497043	+	-6.00880718794403	7.54836226340503e-84	0.738847514394728
CGTACAGATGATCATGCAGT	668158	+	TRUE	rsfS	FALSE	667942	668259	-	-6.00522563417184	2.4500932073579e-43	0.738962541395303
AGAACTGAAGGCCAGCTTCA	3443289	+	TRUE	rplR	TRUE	3443266	3443619	-	-5.99766905924236	4.21534553729615e-06	0.739205349733824
GTTGCCGTTAATTTCCGTCA	1741117	+	TRUE	ribC	TRUE	1740625	1741266	-	-5.99750677435136	7.28494539455593e-86	0.739210566032303
ATAATGAAAGTTTGTGGCAC	2907761	-	NA	NA	NA	NA	NA	NA	-5.99398421499659	7.77315480022843e-12	0.739323809264541
GGTTTTTATCAGTCACTTCC	4393585	-	TRUE	yjeF	FALSE	4392089	4393636	+	-5.99182359794829	5.28197504967464e-37	0.739393285946967
ATGCAAATGAACAGGCAGAG	91146	-	TRUE	ftsL	TRUE	91032	91397	+	-5.98976557841631	4.83307330867234e-06	0.739459475652952
ACATCGGGAACATCACCCGA	2707910	+	TRUE	rpoE	TRUE	2707459	2708034	-	-5.98969531861954	3.85009008822085e-26	0.739461735546863
CCGGGCGGTGTGGTGCCCAC	3807240	-	TRUE	waaA	TRUE	3806563	3807840	+	-5.98890200022272	4.38880199313189e-36	0.739487253451048
TTTCGGCGTCACGTTGCGCC	108680	-	TRUE	secA	TRUE	108279	110984	+	-5.98656242374063	2.72673788039201e-111	0.739562518597488
TAATCGCTGGAATCTTCAGT	3313375	+	TRUE	infB	TRUE	3311364	3314036	-	-5.98573658339295	4.55004242757747e-06	0.739589089882914
GATGGCGACGCGAGCGTCCG	433899	-	TRUE	ribE	TRUE	433871	434341	+	-5.98298048709318	2.75988671525904e-14	0.739677780675439
AATCCCTGGGATTGCCTGCT	3794072	-	TRUE	waaC	FALSE	3794002	3794961	+	-5.9792061824356	1.42473180482208e-14	0.7397992717866
GCTTTATTACCGCGCAGTGT	3208602	+	NA	NA	NA	NA	NA	NA	-5.97679966342674	1.11231657880249e-44	0.739876756076683
AAACGTTGCAGCCCTGCAGT	3397234	+	TRUE	mreC	TRUE	3396897	3398000	-	-5.97296211309898	4.84647063564279e-09	0.740000349815871
ACACGGCATCTGGTTGATAC	4181555	-	TRUE	rpoB	TRUE	4179268	4183296	+	-5.96864418890311	1.41002470625073e-10	0.740139464053052
GGCCTACAAATCCGAGCCGT	2345298	-	NA	NA	NA	NA	NA	NA	-5.96664469463213	9.05774097145904e-22	0.740203901180799
GAAGTCGTGGTGAACGTTGG	4272469	+	FALSE	ssb	TRUE	4272148	4272684	+	-5.96598424884497	4.33417670617944e-09	0.740225187642676
AGATGAACAGCGCGGTCAGC	96088	-	TRUE	mraY	TRUE	96002	97084	+	-5.96532564491984	6.71561417681426e-23	0.740246415959731
GCAGCAATATTATTGACCGT	4252982	+	TRUE	plsB	TRUE	4252066	4254489	-	-5.95726643489994	1.07009334352629e-19	0.74050628145154
GCTATAAGGATCGTTAACCG	3397626	+	TRUE	mreC	TRUE	3396897	3398000	-	-5.95637707666911	1.73138450344518e-08	0.740534969573981
TCGAGTATGGCCCCGCAGGG	433833	-	NA	NA	NA	NA	NA	NA	-5.95541084424637	0.000123863776284084	0.740566139954796
GCACTTACAGGCGGGGATTG	1395848	-	FALSE	uspE	FALSE	1395696	1396646	-	-5.95340924986951	1.52742476378976e-34	0.740630719164154
AACGTCGTCGATATCAGATA	13151	-	TRUE	dnaK	FALSE	12163	14079	+	-5.95115132629348	8.09333543630461e-09	0.740703582069294
GGTTGGTTAACAGATCTAAC	131746	-	TRUE	acnB	FALSE	131615	134212	+	-5.94523290165427	3.10969045797448e-06	0.740894636932378
CCTTCGATCTACGTAACAGA	556978	-	NA	NA	NA	NA	NA	NA	-5.94237664622758	2.83797094638244e-17	0.740986876039075
GACGCAGAAAATGAGCGCGG	1990740	+	TRUE	pgsA	TRUE	1990293	1990841	-	-5.93876467130802	0.000142227329469653	0.741103553028892
CAGCGTGTGAGAAAGTGCTT	131961	-	TRUE	acnB	FALSE	131615	134212	+	-5.93861189585731	5.91959010646011e-27	0.741108488917334
TAACTGCAGCTGCAAAGTCG	939094	-	TRUE	serS	TRUE	938651	939943	+	-5.93756954116613	4.25131355329506e-09	0.741142167198231
TTTTGCAAGCGTAGTGGCAT	3807677	-	TRUE	waaA	TRUE	3806563	3807840	+	-5.93535226182267	5.82774180624801e-14	0.741213817251787
AGCCAGATTGTCATCCGCAA	21921	-	TRUE	ribF	TRUE	21407	22348	+	-5.93052340251914	3.82204369076782e-27	0.741369906895906
AATTGTTCAAATGGGTGGCG	2286679	-	FALSE	yejO	FALSE	2284412	2286922	-	-5.92966440570949	7.75230706745328e-09	0.741397680280353
GCGGTTGATGATAGTCAGCG	1948256	+	TRUE	aspS	TRUE	1946774	1948546	-	-5.92756914001417	3.63267649826803e-32	0.741465433870653
CACAGGCCAGACTACCGCTC	3322228	+	TRUE	folP	FALSE	3322085	3322933	-	-5.92639170461018	1.75462182832332e-59	0.741503513463112
AAGGATGTTAGGATGGACCA	3988811	-	NA	NA	NA	NA	NA	NA	-5.92514192867995	0.000141670108557295	0.741543936909396
GCATTTTTATCTGGATCTAA	203864	-	TRUE	lpxB	TRUE	203348	204496	+	-5.92435607382618	0.00785506778828617	0.74156935729199
CAGCTTCAGCGTTTGCACCT	4177138	-	TRUE	rplA	FALSE	4176902	4177606	+	-5.92389839039445	4.3413110668803e-17	0.741584162976543
CCTGAAAGCTGTGCGTCTAC	968498	-	TRUE	lpxK	TRUE	967589	968575	+	-5.92318063312829	5.94058365474172e-06	0.741607383027459
ATAGCCTTTCAGGGCATATT	2044325	-	TRUE	yeeJ	FALSE	2042935	2050038	+	-5.92083636770919	2.73284289154942e-06	0.741683232115803
CTTGCAGGAAGTGGGTGATC	2400337	+	TRUE	nuoC	FALSE	2400077	2401867	-	-5.92025632890519	1.42129093119774e-30	0.741702001759944
CATGCTGAACCTGAGAAGTT	2907707	+	NA	NA	NA	NA	NA	NA	-5.91960593555839	2.85814149136924e-11	0.741723049157033
ACGCTGTCATCGAATGACTG	977769	-	TRUE	mukB	TRUE	975549	980009	+	-5.91938029962411	1.28748259845625e-11	0.741730351246836
CCCTTTCAGCCGTTTGGTGG	3193642	+	TRUE	rfaE	FALSE	3193342	3194775	-	-5.91781526854598	5.86928136069925e-54	0.741781003153996
ATTAAGACGCTCTCTCCGTT	4177962	+	NA	NA	NA	NA	NA	NA	-5.91436407588648	3.44970833934842e-38	0.741892724742453
TCAGTCATGTAGACCAGGTC	109548	-	TRUE	secA	TRUE	108279	110984	+	-5.91319025647142	1.14999913049973e-19	0.741930731151619
AGCCCAGAATACGGTCAGTC	4253694	+	TRUE	plsB	TRUE	4252066	4254489	-	-5.91213526521423	2.49876155815913e-37	0.741964893416539
CAGATCGATATCCTGGCTGT	200864	-	TRUE	skp	FALSE	200482	200967	+	-5.91148706765042	6.09270677601102e-70	0.741985884626535
CATCAGCAGGTTGTCGCTGT	1282388	-	TRUE	narG	FALSE	1279087	1282830	+	-5.91089354537733	2.98540642996408e-18	0.742005106275309
CTTCCGGCAGGATGCCGTAC	3312491	+	TRUE	infB	TRUE	3311364	3314036	-	-5.91032297563723	1.0887049869362e-07	0.742023585528574
GCTGATTGGCGCAGGACGAT	4176055	-	TRUE	nusG	TRUE	4175766	4176311	+	-5.91003726630371	2.65152917935833e-50	0.742032839248313
CGGAACGGGCAAGGCAACGT	4124822	+	TRUE	priA	FALSE	4122635	4124833	-	-5.90857181972754	1.5218002861245e-65	0.742080306610846
TTTTGGCGATGGAAGGTCCG	680063	+	FALSE	djlC	FALSE	679435	680886	+	-5.90769909071129	4.64988200212854e-22	0.742108578110895
AACGCTTTTGCGTCCGGGCT	3403740	-	TRUE	accB	TRUE	3403458	3403928	+	-5.90614834344393	3.65010529108197e-30	0.742158818894825
CACTGGCGCAAGCTGTTGAG	1262332	+	TRUE	lolB	TRUE	1262100	1262723	-	-5.90550685800827	2.79147850538483e-05	0.742179603594165
TTTGCGCCAACCGACAAACC	4019858	-	TRUE	ubiB	TRUE	4018249	4019889	+	-5.9010200428857	1.71772076961102e-22	0.742325012954221
ATACAGCGCGTCGGCCTTGC	553074	+	TRUE	lpxH	TRUE	552441	553163	-	-5.89721321683504	8.79376086682645e-20	0.742448429815942
TCCTGTTTTTCAACCTATTC	1115832	+	NA	NA	NA	NA	NA	NA	-5.89673064599397	2.2813049810021e-28	0.742464077637841
TTTGATGTCATCTTCCATCT	198832	-	TRUE	bamA	TRUE	197928	200360	+	-5.89442979886913	7.06150191068114e-146	0.742538693880889
CCGAAGGTTTCATCCAGCGT	4091640	+	TRUE	rhaD	FALSE	4091471	4092295	-	-5.89117455809946	1.43679508830415e-43	0.742644286637751
CGCGCGTCTGGCGGGTGTAC	1980916	-	FALSE	araH	FALSE	1980578	1981567	-	-5.88904433150168	1.16471945774114e-14	0.742713402699967
CACATTTACGCGATGAGGCA	3396751	+	TRUE	mreD	TRUE	3396409	3396897	-	-5.88830911556189	9.99317318542995e-15	0.742737260064423
ACCCCGGTAACGCCATCGTG	4262934	-	TRUE	dnaB	TRUE	4262337	4263752	+	-5.88163638651315	1.05132779423303e-63	0.742953856657739
GAGAGCACGGTTATCGAGGT	3882796	-	TRUE	rnpA	TRUE	3882516	3882875	+	-5.88143071283564	1.27559925098647e-37	0.742960534826331
TCTTCGGGGGAGACGGGCGG	3268556	-	FALSE	rnpB	FALSE	3268238	3268614	-	-5.88112036570314	7.45126551969835e-11	0.742970611940906
TATCGTCGTTGTCGAGGTTA	217167	+	TRUE	proS	TRUE	217057	218775	-	-5.88110562067886	3.20720652520808e-32	0.74297109072545
ATGGTCGTGCGTTTTAGCTG	3210458	-	TRUE	dnaG	TRUE	3209129	3210874	+	-5.88079183951718	9.51907225873877e-43	0.742981279635588
CTGATGTCCTGGGTATAGCG	2158669	-	TRUE	mdtC	FALSE	2156410	2159487	+	-5.87793461959967	3.30165880748528e-20	0.743074070394274
AACCGGTTTCCGGCTCGTTC	168287	-	TRUE	fhuA	FALSE	167484	169727	+	-5.877149242835	1.28360994813354e-35	0.743099580264543
CACACGGTCAACACCGACGC	1260745	+	TRUE	prs	TRUE	1260151	1261098	-	-5.87650193277684	1.34295542328884e-55	0.743120606898507
CCTATTTACGCCGCGGGTGC	2997423	-	FALSE	ygeR	FALSE	2997158	2997913	-	-5.87320781727502	1.2363770984319e-15	0.743227628402901
AACGTTCGCGGTAGTGTTGC	3996623	-	TRUE	uvrD	FALSE	3996006	3998168	+	-5.8728913226308	6.54250283980531e-24	0.743237912523107
GTTACGATGATCTGCACATC	968003	-	TRUE	lpxK	TRUE	967589	968575	+	-5.87091860049131	1.74923870080645e-103	0.743302020218585
CCGTCTCGGCCAGTCTGGCC	2583790	+	FALSE	narQ	FALSE	2583753	2585453	+	-5.86430884169231	1.07885853265898e-07	0.743516898660897
TGTCATTGAAGCGCTGCGTC	2597521	+	TRUE	dapA	TRUE	2596904	2597782	-	-5.86421403867152	2.24616547453668e-68	0.743519981541764
TGACTTTCTGTAACTCTTCC	3161865	+	TRUE	parC	TRUE	3161737	3163995	-	-5.86059973434669	1.15442885480343e-16	0.743637533465866
GCGCCGTAACCCCCAGGTCC	235953	+	TRUE	rnhA	FALSE	235535	236002	-	-5.85831442905346	1.28710678868634e-46	0.743711880102262
TTGTTTTACCGGCACCTTGC	2745496	+	TRUE	ffh	TRUE	2744456	2745817	-	-5.85641533381359	1.25742201327724e-42	0.743773673680594
GCATCACAGGACCGTAGATC	2349319	+	TRUE	glpT	FALSE	2349038	2350396	-	-5.85487251785266	1.79997381377714e-40	0.743823882050568
CAAAGCTGCAACAGCCGCCT	112218	+	TRUE	zapD	FALSE	111856	112599	-	-5.84800207075861	1.89984385609642e-14	0.744047551613145
ATTATGGGGTACACCAGTTG	3900499	-	FALSE	bglB	FALSE	3900312	3901724	-	-5.84691910842557	1.46262495184417e-08	0.744082820065252
CAACTTTGCGGCAGTTTCAT	2041273	+	NA	NA	NA	NA	NA	NA	-5.84482906655041	1.36806094082144e-22	0.744150895175291
CGCACTGCCATGCACGATCG	1799175	+	TRUE	thrS	TRUE	1798666	1800594	-	-5.84077973892052	8.80238451958455e-36	0.744282821966543
AGTAATACGAATTGCCGAAT	1264953	-	TRUE	prfA	TRUE	1264235	1265317	+	-5.83715286117549	5.66915836922381e-06	0.744401025090172
CCAGTCGAAGATGTAGTCCG	1959401	-	TRUE	argS	TRUE	1958086	1959819	+	-5.83708080842176	2.5037035608111e-14	0.744403373732899
GCGGCTGGATATATGGCCCA	689006	+	TRUE	lnt	TRUE	688566	690104	-	-5.83214964613705	1.39428125546031e-34	0.744564145885239
TGATTCACCGTTGTTAAGCT	3792578	-	TRUE	rfaD	FALSE	3792010	3792942	+	-5.83132204568657	6.30254089900279e-43	0.744591135194983
ATGACCGGTAGCGATATAAT	1192634	+	TRUE	mnmA	FALSE	1191890	1192996	-	-5.83115209456749	2.35702544742482e-20	0.744596677801688
GGGCGCTTAGCGCCGTTGCG	3980381	-	NA	NA	NA	NA	NA	NA	-5.82990258918809	2.38840153716339e-12	0.744637430387064
GCCACCAGATACCACTTCTC	1261604	+	TRUE	ispE	TRUE	1261249	1262100	-	-5.82934071146143	6.64017028182753e-38	0.74465575746851
AGTGGCTTTGCCAGTATTCC	3277916	-	TRUE	kbaZ	FALSE	3276936	3278216	+	-5.81954921999814	5.96890131404305e-16	0.744975276948148
CAGCCAGTTGATCCACTGCG	2283524	-	TRUE	yejM	TRUE	2282398	2284158	+	-5.81693848963306	2.39553519558336e-18	0.745060517550328
AGGTCTGGAAGCGTCACAAG	102934	+	FALSE	ddlB	FALSE	102233	103153	+	-5.81155528891564	1.87112460433379e-08	0.745236341174005
GTGATGATCCGGCTACCGCC	3583402	+	TRUE	ggt	FALSE	3583104	3584846	-	-5.81133452808501	2.64093388533818e-18	0.745243553333972
TTGGCGTGCCAGTGGATAAC	965803	+	FALSE	ycaI	FALSE	963543	965807	+	-5.81052602461275	3.67393572575026e-41	0.745269967981311
TGCCAGGCCCGGAGAGTGAC	1213233	+	TRUE	bluR	FALSE	1212551	1213282	-	-5.80623174500917	2.23131793853768e-15	0.745410297942808
AGATGCCATCACTCCGCTTC	102483	-	TRUE	ddlB	FALSE	102233	103153	+	-5.80308100103627	2.06100202753994e-39	0.745513292665471
TCGCTCCACGTTTGGCGGCC	2344386	-	TRUE	nrdA	TRUE	2342887	2345172	+	-5.79575974031955	2.95058486788478e-81	0.745752727422003
CTTTACCGGTTAGTGCGTTC	108629	-	TRUE	secA	TRUE	108279	110984	+	-5.79469187881514	1.55051009318612e-132	0.745787663653371
GACCTTCACCACCACCATGT	3448696	+	TRUE	rplB	TRUE	3448565	3449386	-	-5.79367020740967	6.17253295392802e-20	0.745821091790374
GATCCGCAGCAGATTATCTC	3721468	-	FALSE	glyS	TRUE	3720351	3722420	-	-5.79205530161932	3.81536493900762e-16	0.745873936116336
CCGCCAGCAATGTGGAAATA	1338383	-	TRUE	lapA	FALSE	1338267	1338575	+	-5.79173105500022	7.40911134711563e-11	0.745884547293761
TGTATGGCGGCGTTCCTGGT	641726	+	FALSE	ybdR	FALSE	641311	642549	+	-5.7914504487364	2.44206558996518e-11	0.745893730556429
GTTCAGCAATAGCATCGGCC	2956474	+	TRUE	ptrA	FALSE	2954018	2956906	-	-5.79129906339195	2.20595211571103e-06	0.745898684963768
TACGGTCATCGGCGTGAGAT	1357113	+	TRUE	puuP	FALSE	1355826	1357211	-	-5.787016195354	5.65721681407068e-17	0.746038878204076
TTCAGGATCGATTGTGCCGT	3438431	+	TRUE	rpoA	TRUE	3438062	3439051	-	-5.78686032786133	2.50300299150857e-19	0.746043981285751
TGAAAACGTTGCTCAGGCAG	2490838	-	FALSE	frc	FALSE	2490026	2491276	-	-5.78210102373457	2.35417092604614e-07	0.746199833908614
TACCGGCCGAAGTAATGGCC	930391	+	TRUE	trxB	FALSE	930308	931273	-	-5.78140534229948	1.53455567347186e-05	0.746222620798339
GAACTGAACTACGGGCACGA	90984	-	TRUE	rsmH	FALSE	90094	91035	+	-5.78097956102713	1.09446755909991e-10	0.746236567855185
ATTTTCTCAGCTTCTTCGTC	1151003	-	TRUE	acpP	TRUE	1150838	1151074	+	-5.78070952773905	6.78985832199634e-24	0.746245413440695
TCCGCTTCGATCGAGTGCGG	4262415	-	TRUE	dnaB	TRUE	4262337	4263752	+	-5.77682592491024	1.11822278748637e-73	0.746372653329526
CCATGCCTTCCGGCAGTTCA	1143119	+	TRUE	rne	TRUE	1140405	1143590	-	-5.77358027207025	7.41614271932944e-34	0.746479025120568
GCGGCACCCAGCGAGCCAGA	4018761	-	TRUE	ubiB	TRUE	4018249	4019889	+	-5.76419276445788	5.74435049519214e-10	0.746786858462312
TTCGAACTCTGGAACCCTTT	1030886	+	TRUE	serT	FALSE	1030848	1030935	-	-5.76377778765245	3.16013207875758e-34	0.746800472161574
GTTCATCAATACTCAGCGCC	92105	-	TRUE	ftsI	TRUE	91413	93179	+	-5.76335133994745	3.97327233445836e-34	0.74681446269147
CCACCAGCCAGACAACGACC	967774	-	TRUE	lpxK	TRUE	967589	968575	+	-5.76258286218691	2.46169842345858e-05	0.746839675573035
ACCAGTCAGGGGCTATTTGA	3843712	+	FALSE	adeD	FALSE	3841987	3843753	+	-5.75783882361807	4.59736113382545e-08	0.746995359785983
GAAGTGGTACATCGCGGTCA	770718	-	TRUE	cydA	TRUE	770681	772249	+	-5.75656087937991	3.86532250358645e-41	0.747037308937309
GTGAAGCGCTCTTTGCGTGT	3451165	+	TRUE	rpsJ	TRUE	3450981	3451292	-	-5.75275382327439	3.27458360172951e-96	0.747162305364999
TTTACACTGACGGAGCATGA	4152563	-	FALSE	argE	FALSE	4151719	4152870	-	-5.74797800633929	5.52054296922059e-08	0.747319168115185
ACCGCCCAACTGCATTGCCA	2630285	+	TRUE	guaA	FALSE	2628980	2630557	-	-5.74649892122901	2.28897011178176e-46	0.747367762347555
TCATCGCTTCACTGTCTGCC	24781	-	TRUE	ileS	TRUE	22391	25207	+	-5.74541674503761	1.23802792129904e-34	0.747403320438563
CATCCAGCAGGTTGAAGCTG	3722585	+	TRUE	glyQ	TRUE	3722430	3723341	-	-5.74474900448425	3.06406746605218e-12	0.747425262712213
GAGTGTGTAGCGGGTTAATT	1191606	+	TRUE	hflD	FALSE	1191213	1191854	-	-5.73930091064851	8.76842849532506e-35	0.747604337829011
GGCGGCGCGAATCAATGCGC	439780	+	TRUE	ispA	TRUE	439426	440325	-	-5.7377999585217	4.53546391405849e-34	0.747653688176139
AAGACGAATTCCATTTTCTT	2702681	+	TRUE	lepB	TRUE	2702357	2703331	-	-5.73587156413349	4.85252941162507e-08	0.74771710211532
CTCCGCGCCGCGGTACAGCT	2685302	+	TRUE	glnB	FALSE	2685092	2685430	-	-5.73581665991686	8.69565389372231e-50	0.747718907760675
CCTGCACAGGCTGCATCATA	4393460	-	TRUE	yjeF	FALSE	4392089	4393636	+	-5.72958738628298	1.44391283167371e-25	0.747923827700422
CTGTACAGAAGCATTCACGG	3811529	-	TRUE	dfp	TRUE	3810754	3811974	+	-5.72905509662276	4.29613503405809e-08	0.747941343260063
CACGGATCATTTCGCTGATC	1267286	-	TRUE	ychA	FALSE	1266543	1267352	+	-5.72831351572333	1.05184907178473e-55	0.747965747139113
AGTTCAATCACGCCTTTACG	3879758	+	TRUE	dnaN	TRUE	3879244	3880344	-	-5.72479150235873	1.24337639602612e-37	0.74808167099071
ATCCGCGAAGGCGTTGGTCC	3524585	-	TRUE	yrfF	TRUE	3524491	3526626	+	-5.7218405033965	1.00515509014254e-67	0.748178828095321
TCATCTTCCGGGTCCGGAAT	4196075	-	TRUE	hemE	FALSE	4195739	4196803	+	-5.7199654501445	1.08750824856318e-05	0.74824057445439
ACGGGAAGTTCGGGTCAACG	2963597	+	TRUE	lgt	TRUE	2963184	2964059	-	-5.71703723195589	1.87375537748144e-31	0.748337022403882
CCCAACGGTGCCTGAGTATC	1794236	+	TRUE	pheT	TRUE	1793581	1795968	-	-5.71597318013138	2.16533711197376e-53	0.748372075684132
GTTTTCACCAGCGCCAGATC	3368562	+	TRUE	nanE	FALSE	3368369	3369058	-	-5.7112256295288	8.25112713647641e-53	0.748528515250927
TGGGTCGATAACGTTACCCT	4480187	+	TRUE	valS	TRUE	4479005	4481860	-	-5.70850960893235	6.47776597677339e-69	0.7486180419922
TAAAGTCGCCGGTATCCGTG	3887931	+	FALSE	tnaA	FALSE	3886753	3888168	+	-5.70640703125114	5.97374350946862e-35	0.74868736284885
TACGTGGTAAAACTGCAAAG	1958743	+	FALSE	argS	TRUE	1958086	1959819	+	-5.70458494240694	1.77979072178717e-15	0.748747446523363
TCTTTCAGCTCGTCCTGAGT	3308697	+	TRUE	pnp	FALSE	3307055	3309190	-	-5.70412221602666	2.98287839613666e-49	0.748762706536165
ATAATGCGGCACCGCGTCGT	4008977	-	TRUE	yigL	FALSE	4008223	4009023	+	-5.70365312321752	1.01623268787153e-16	0.748778177139045
GCTGTGCTTGGTCGGGATAG	13409	-	TRUE	dnaK	FALSE	12163	14079	+	-5.70307042293023	3.75891259433835e-23	0.748797395387978
GGTTTCAACTTCATACACTA	2704040	+	TRUE	lepA	FALSE	2703347	2705146	-	-5.70115137271213	2.79212336525852e-05	0.748860695252436
GGTTCAGCTGGCGTTGGCGC	1141975	+	TRUE	rne	TRUE	1140405	1143590	-	-5.70072365838627	5.25533638659069e-34	0.748874804866396
CACATCGGCTAACTGTTGCT	2749178	-	TRUE	nadK	TRUE	2748853	2749731	+	-5.69952058645842	1.42602781264417e-30	0.748914495143192
GGCAACGATTTCAGCTTTAG	4447193	+	TRUE	ppa	TRUE	4447145	4447675	-	-5.69468284988533	1.25162100198674e-08	0.74907413831015
CAACAATTCAAGGCGCGGCG	1026661	+	TRUE	yccT	FALSE	1026334	1026996	-	-5.69412784505675	5.42152329699519e-12	0.749092457576111
CCCATCTTACTTAGTCTGTC	3524462	-	NA	NA	NA	NA	NA	NA	-5.69323030581079	3.87294940882221e-212	0.7491220849086
CATCAATTACAGAGTTACGC	1260318	+	TRUE	prs	TRUE	1260151	1261098	-	-5.69238679783191	9.26501790952149e-20	0.749149930831614
GGATGCGCCTTCCGTCAGAT	3601517	+	TRUE	ftsY	TRUE	3600773	3602266	-	-5.69084445194156	9.81863374528955e-102	0.749200852176543
GCGATAGTCGCGATTAAAGA	4019240	-	TRUE	ubiB	TRUE	4018249	4019889	+	-5.68884679546762	1.35071565822497e-05	0.749266816125532
TACATGGCGAATTTCCCCAT	4599287	+	TRUE	dnaT	FALSE	4599001	4599540	-	-5.6871129437592	8.67531390081997e-33	0.749324078482026
GATAGAGCGCTGCCCTCCGG	3980437	+	FALSE	argX	FALSE	3980398	3980474	+	-5.68416379673254	1.81880286846043e-36	0.749421497408192
CTTGTTTGATACCACCGATG	3376436	+	TRUE	rplM	TRUE	3376245	3376673	-	-5.68309247333761	4.6844529567398e-58	0.749456892616486
TCGCTCTCATTGTCATAGTG	131581	-	NA	NA	NA	NA	NA	NA	-5.68189189427302	1.81271524775199e-27	0.749496562246307
ATGACTTCCGTCAGGTTGTG	2336892	+	TRUE	gyrA	TRUE	2334815	2337442	-	-5.67608366973341	2.6140816251089e-17	0.74968853738578
GGTTCGCCAGGTGCAGGGTC	4303477	+	TRUE	yjcS	FALSE	4302635	4304620	-	-5.67595084996358	2.40513166255914e-15	0.749692928533901
GGTGGTGCCGGTGCATGTTC	3264548	+	TRUE	tdcA	FALSE	3264149	3265087	-	-5.67588246455857	3.03120073837943e-58	0.749695189440599
TCTGGGGCTTGCCTGATGGC	1385480	-	TRUE	tyrR	FALSE	1384744	1386285	+	-5.67533729659672	8.22684301154802e-43	0.749713213860395
GCCACATGTTTCGGGTTACG	3161418	+	TRUE	plsC	TRUE	3160766	3161503	-	-5.6706057467116	6.47101526192593e-42	0.749869685439079
AGGCCGGAACGATCCGGGAT	3526423	-	TRUE	yrfF	TRUE	3524491	3526626	+	-5.6693312893297	7.67423840244924e-13	0.749911842701853
TGCGCCAAAGTCAACGATAC	3307301	+	TRUE	pnp	FALSE	3307055	3309190	-	-5.66757259105764	2.64410920895626e-42	0.749970025758581
TTAACTGTTCGAACTGTTCC	978344	-	TRUE	mukB	TRUE	975549	980009	+	-5.66745869984836	2.54877678146003e-23	0.749973793935433
TCGCTCAGTTCCGCCTGCAA	3881670	+	TRUE	dnaA	TRUE	3880349	3881752	-	-5.6634830989493	2.76507123711475e-65	0.750105353434757
ACTGGGCGCGCAGCATATGT	3296547	-	FALSE	yraR	FALSE	3296233	3296868	-	-5.66266872532456	8.62719237817256e-10	0.750132308160302
GGCACCCCATTTATCAGCAC	2637476	+	TRUE	hisS	TRUE	2637323	2638597	-	-5.66265066650895	1.81489291095944e-22	0.75013290590596
GGAAACGCATCAGTTTTTCG	2700814	+	TRUE	era	TRUE	2700503	2701408	-	-5.65603006000603	3.23542364531244e-26	0.750352111776615
TCAGGCGTGGTCAGTCGCAC	3524444	-	NA	NA	NA	NA	NA	NA	-5.64910598632986	3.69927035291856e-173	0.750581502433719
GCCCAGCATACGCTGGTAGC	673818	+	TRUE	leuS	TRUE	671424	674006	-	-5.64749249947898	7.75050230326188e-10	0.750634976494245
TCGGTTGCCCGTTTTTCATG	1143749	+	FALSE	yceQ	TRUE	1143725	1144045	+	-5.64715630960836	8.26214037251289e-36	0.750646119432996
CTGGTAACTCATCCTGCAAT	3881719	+	TRUE	dnaA	TRUE	3880349	3881752	-	-5.64566912808305	1.86787249156657e-38	0.750695415703932
ATAATGCGCAGAACCAGTAC	2472747	-	TRUE	yfdQ	FALSE	2472054	2472878	+	-5.64467037738237	7.06994907693319e-24	0.750728525374328
ACACTGGCGTCGGCTCTGGC	2962370	+	NA	NA	NA	NA	NA	NA	-5.63617760230124	2.53744565766687e-22	0.751010188145535
GCCGACGACATGAACGTGTT	979915	-	TRUE	mukB	TRUE	975549	980009	+	-5.6353421135669	9.27598594833227e-26	0.75103790853732
GCGCGAAGTGGGTAGTACCC	127359	-	TRUE	aceF	FALSE	125695	127587	+	-5.63246349187341	1.08800633314143e-22	0.751133433004505
GTTGGTCGGCCTGATGTTCC	1265269	-	TRUE	prfA	TRUE	1264235	1265317	+	-5.63166787330084	1.70120125459881e-79	0.751159839176296
TTCAGCCACGCCGATTGCGT	3085626	-	TRUE	metK	TRUE	3084728	3085882	+	-5.62898185258987	5.38983251260333e-112	0.751249000540179
GGTTCCAGCTGCGGGAGGTC	4003391	-	TRUE	pldA	FALSE	4002885	4003754	+	-5.6288639788081	5.76576482144076e-42	0.751252913797196
CCTCTGAAGGTCTGAGAGAC	3161530	+	NA	NA	NA	NA	NA	NA	-5.62712623014291	2.31370863851053e-05	0.751310609535263
TGCGAACGCCTTGTTGGCTT	3471669	+	TRUE	rpsG	TRUE	3471564	3472103	-	-5.62227348708049	1.01719786459595e-100	0.751471774475216
TCTGTCGGCATCGGTATTCC	1178011	+	FALSE	nagK	FALSE	1177816	1178727	+	-5.61409604051468	2.42123810839778e-97	0.751743512963921
CGCTCAGACGGTCGTTAGTT	4180329	-	TRUE	rpoB	TRUE	4179268	4183296	+	-5.61335282609485	2.01276152002981e-24	0.751768219898056
TGATACGCGCTTCACGAACC	3324825	+	TRUE	ftsH	TRUE	3323023	3324957	-	-5.60593379360647	2.16599974977415e-65	0.752014942413396
CGCAACCTGAGGCTGCATGT	199537	-	TRUE	bamA	TRUE	197928	200360	+	-5.60406854632947	6.59064919751213e-71	0.752076997340398
ATCCCTTCACTACAATAGTC	4018945	-	TRUE	ubiB	TRUE	4018249	4019889	+	-5.60367321788519	1.24151208521975e-11	0.752090150841003
TGTTCCGATGTTTGCCACGC	22119	-	TRUE	ribF	TRUE	21407	22348	+	-5.60233556770333	1.49993452350442e-113	0.752134660998992
AGGTTTGAATCAGTTGATTC	3820440	-	TRUE	spoT	TRUE	3820423	3822531	+	-5.59998926506084	2.20236579644249e-16	0.752212746679561
TGAGGATGACGAGCACATCC	2744426	+	NA	NA	NA	NA	NA	NA	-5.598436665952	4.08039592207551e-36	0.75226442657483
TACAGGATAATGCCGTAGGT	207160	-	TRUE	dnaE	TRUE	205126	208608	+	-5.5982970138279	1.02774231327823e-05	0.752269075390845
TTCTTCGCCTGCAACGTTCC	962407	-	TRUE	rpsA	TRUE	961218	962891	+	-5.59669442570167	1.07873593162631e-25	0.752322427330967
TGTCGCTACCCGCAGAGTTC	193141	-	TRUE	frr	TRUE	192872	193429	+	-5.59597460869908	1.84759627709661e-30	0.752346393302074
GCCAGCATCAACTTCCAGCC	3439191	+	TRUE	rpsD	TRUE	3439077	3439697	-	-5.592773782359	2.88855911481134e-20	0.752452981814655
CGGAATCCGCCCCGGTATGC	3601207	+	TRUE	ftsY	TRUE	3600773	3602266	-	-5.59202873506757	1.62060672840572e-34	0.752477796454483
GCACTTCCATACCGATTTGC	1798251	+	TRUE	infC	TRUE	1798120	1798662	-	-5.58491248404767	1.73267119093061e-32	0.752714893715331
CGTTTAACAAACGGTGGCGT	3811474	-	TRUE	dfp	TRUE	3810754	3811974	+	-5.58369935648275	3.24802987954141e-25	0.7527553272675
CATCGCGAACTTGCTCTGCC	1263986	-	TRUE	hemA	TRUE	1262937	1264193	+	-5.58026836843009	5.65234221936422e-159	0.752869705648318
AATAGTGTCAACATTCAGCC	2700935	+	TRUE	era	TRUE	2700503	2701408	-	-5.57677093030189	2.57337807302034e-41	0.752986335046838
GCAGTGTGCCGTCTACGTGC	98085	-	TRUE	murD	TRUE	97087	98403	+	-5.57453879897978	2.25364030375532e-199	0.753060789032301
CATCAGACGAGCGTTCACAT	192147	-	TRUE	pyrH	TRUE	191855	192580	+	-5.57137292371626	1.44965597392778e-06	0.75316641382225
GTTTCAGTTTACCGGTATAT	2702190	+	NA	NA	NA	NA	NA	NA	-5.56827011080833	1.56122702712779e-09	0.75326996338361
TTGAGAAGCGCCTGCACTTC	2637960	+	TRUE	hisS	TRUE	2637323	2638597	-	-5.56608345433607	5.40092086809298e-21	0.75334295534272
TTATGGCCCGCTGGATTGGA	2204270	+	FALSE	yehM	FALSE	2203717	2205996	+	-5.56551394789612	4.00411266771109e-12	0.753361968145423
CTTCATGGAACAGTTTGGCC	3600979	+	TRUE	ftsY	TRUE	3600773	3602266	-	-5.56477874498104	3.68413403479618e-40	0.753386514094725
GTAAACATCGGTTTTTTACT	3807965	-	TRUE	coaD	TRUE	3807848	3808327	+	-5.56383473197459	1.80531237411014e-13	0.75341803385529
TTCTCTGGCGAAAGCCTGCA	553311	-	FALSE	ppiB	FALSE	553166	553660	-	-5.56365328823424	2.63678859629e-05	0.753424092403716
GCGCGGTGGAGGTTGCCACC	3526137	-	TRUE	yrfF	TRUE	3524491	3526626	+	-5.55563813063329	3.03612553916168e-49	0.753691822042132
CCCATCCGTACAACGCTTTC	696180	+	NA	NA	NA	NA	NA	NA	-5.55211663032114	2.21358880911868e-161	0.753809510595721
AGCGCAGAACCGTGAGTACG	3308187	+	TRUE	pnp	FALSE	3307055	3309190	-	-5.54963952185165	5.53549912563649e-11	0.753892317592315
GGGCCCTGCCAGCTACATCC	475757	-	TRUE	ffs	FALSE	475672	475785	+	-5.54799350844904	3.63705995702715e-14	0.75394735206172
GTGCCACGTCTTTGATTTCG	92426	-	TRUE	ftsI	TRUE	91413	93179	+	-5.54620667495805	2.32105733570403e-137	0.75400710394808
ACGTCAATGCGCAGATCCGC	3033597	+	TRUE	prfB	TRUE	3033206	3034304	-	-5.54480304687845	1.03115858711772e-75	0.754054048050503
TTCACGGGCAACCACGGTGA	1959602	-	TRUE	argS	TRUE	1958086	1959819	+	-5.54450746372118	6.03306981465155e-38	0.754063934524032
GATCATATCCTGTGGCATCA	4180724	-	TRUE	rpoB	TRUE	4179268	4183296	+	-5.53651248210048	1.96604419778299e-59	0.754331443851491
TGGATTTACCTGCGTTGGAA	4048689	+	TRUE	yihA	TRUE	4048156	4048752	-	-5.53369805098017	1.44205807577406e-13	0.754425658919333
AACGATAGGTCGGTTCTGCC	3881386	+	TRUE	dnaA	TRUE	3880349	3881752	-	-5.53248676084878	1.10838513117877e-25	0.754466214955833
CAATCTCATCGGCAGCTTCG	1142621	+	TRUE	rne	TRUE	1140405	1143590	-	-5.528273184192	1.21582281885984e-100	0.754607326580576
GCGGGGCTTTCATCCGTTAC	3330870	+	NA	NA	NA	NA	NA	NA	-5.52510610641978	6.95597696154377e-53	0.754713425973825
AACCGGGTTAAGCACCAGCT	771195	-	TRUE	cydA	TRUE	770681	772249	+	-5.51913387525533	1.02929383187276e-09	0.754913581231474
TCACGACGGAAGAAGCTACC	3308970	+	TRUE	pnp	FALSE	3307055	3309190	-	-5.51640802415199	1.97164503014878e-20	0.755004971564076
CACCAGTTCAGGGGTTTTAT	3810806	-	TRUE	dfp	TRUE	3810754	3811974	+	-5.51514475381741	1.76253886478378e-09	0.755047333067564
AGCTGACGCTGTTTACGACG	1141438	+	TRUE	rne	TRUE	1140405	1143590	-	-5.51375222043873	7.97335247553708e-60	0.755094034683692
CATCAGAGTCCGCATCCGCG	3171957	+	TRUE	parE	TRUE	3171526	3173418	-	-5.51363857142521	2.75743126478493e-18	0.755097846403946
GCAGTGCATTAAACAGCTCA	1646233	-	TRUE	dicA	TRUE	1645958	1646365	+	-5.51266811828037	2.79499938728586e-07	0.755130396392062
TATTCACCGTCGGTACGCCG	2217353	+	TRUE	osmF	FALSE	2216586	2217503	-	-5.50721839501572	1.61803548924844e-32	0.755313237808395
ATCGCCTGACGCCACTCCAG	493110	-	TRUE	dnaX	TRUE	491316	493247	+	-5.5067995388526	3.9164232465683e-53	0.755327294342919
GCAGCGGGTTAGTGTACATG	2638003	+	TRUE	hisS	TRUE	2637323	2638597	-	-5.50515819737484	3.06573511224572e-41	0.755382381714739
GTATGGCGGCCCATAATCAC	49937	-	TRUE	folA	TRUE	49823	50302	+	-5.50406164211279	1.03577051636547e-66	0.755419189227032
AAGAGACGTGCCCGGCGTGC	3193722	+	TRUE	rfaE	FALSE	3193342	3194775	-	-5.50076312737815	7.494501358109e-148	0.755529930418893
GGAGGTGCGTCCGCCGTAGG	3792362	-	TRUE	rfaD	FALSE	3792010	3792942	+	-5.49973352318996	1.20807159765757e-100	0.755564504018614
GGCGTCGTGTGGACCAGGGC	30717	-	TRUE	carA	FALSE	29651	30799	+	-5.49964356061864	1.66626344992072e-12	0.755567525067609
CGCGCCATCTGCTCGCCCTG	4485716	-	TRUE	lptG	TRUE	4485341	4486423	+	-5.49772640791351	4.05284907507408e-27	0.755631911054812
GCGTATTCGGGTAGCGCTCC	1358842	+	TRUE	puuA	FALSE	1357514	1358932	-	-5.49614169533242	3.84094607672775e-28	0.755685140600231
TTACATGCGTGGGCGTGCAG	1174706	+	FALSE	lolC	TRUE	1174650	1175849	+	-5.49336742014203	8.79999680867322e-17	0.755778344898998
TTCTGTTCCTGACTGATGAT	970283	-	TRUE	kdsB	TRUE	970075	970821	+	-5.49296037105017	6.03597098601575e-24	0.7557920220177
AGCCCCGGACGGTCGGTCAT	3207967	+	TRUE	tsaD	TRUE	3207552	3208565	-	-5.49220688484123	2.11191971086094e-22	0.755817340958982
TGGTCCGCAAAAATAACGGT	4185218	-	TRUE	rpoC	TRUE	4183373	4187596	+	-5.48875822615943	2.78097883705383e-47	0.755933245803906
CTTTGCTTAATTTATTACCG	670492	+	TRUE	holA	TRUE	669797	670828	-	-5.48376818060432	2.70775506601874e-12	0.756101017562754
GGCTTTTTTCTGGCCAACAA	3309062	+	TRUE	pnp	FALSE	3307055	3309190	-	-5.48012449485654	5.45829484002792e-15	0.756223570020246
ATTCTCAAAGTCGCCCTGGT	101369	-	TRUE	murC	TRUE	100765	102240	+	-5.47807154192465	1.4916366788185e-13	0.756292636950314
TGTTTTCTGCCGCCACATCC	4490073	-	FALSE	idnT	FALSE	4489229	4490548	-	-5.4754146223368	6.47499434974112e-76	0.756382041695678
CAAGCCTGACTGCCACTGTC	3811204	-	TRUE	dfp	TRUE	3810754	3811974	+	-5.47363837079981	1.31430258082327e-54	0.756441823949977
GGGCTTCGTCGCGGGCAATC	2346104	-	TRUE	nrdB	TRUE	2345406	2346536	+	-5.47262893532587	4.83930551902612e-42	0.756475802137988
GATCCAGCACGGTCTGCCCA	4017063	-	TRUE	ubiE	FALSE	4016878	4017633	+	-5.47208839495223	3.07447153164852e-27	0.756493998297844
AACGCTCATGAGCACCTGGC	3945762	-	FALSE	hdfR	FALSE	3945151	3945990	-	-5.4709662799625	7.49605192534849e-11	0.756531774744329
TTCAACGATAGCATCAACCG	672246	+	TRUE	leuS	TRUE	671424	674006	-	-5.47031778196048	2.3282159379462e-19	0.756553608407259
AAGTGTACTATACATTCGGC	106502	-	NA	NA	NA	NA	NA	NA	-5.46756745629512	5.19513809373915e-07	0.756646220516268
GCTTCGCTGATCCACATTAA	210822	+	FALSE	ldcC	FALSE	209679	211820	+	-5.46544616404639	5.60862596082244e-07	0.756717666582858
TTTTGCGGGCGCGTTTGGTT	107817	-	TRUE	secM	TRUE	107705	108217	+	-5.46508374632289	4.59857190289828e-62	0.756729874322529
CATTATCGCTTGCGACAATG	927687	+	TRUE	cydC	TRUE	926697	928418	-	-5.46501828366447	8.4112224198467e-26	0.756732079419745
ATCGTATACCACAGCAACTT	2661795	-	TRUE	suhB	TRUE	2661464	2662267	+	-5.46234646141752	1.40555755656672e-71	0.756822090212172
CCAATGCCAGGATCGACTGC	103376	-	TRUE	ftsQ	TRUE	103155	103985	+	-5.45822819208311	2.01361793153808e-21	0.7569608721846
AACGCTGGCGGGTCACGTAT	202997	+	FALSE	lpxA	TRUE	202560	203348	+	-5.4496603703122	1.31870801950371e-27	0.757249763229429
ACCGCCGGTACACCCTCTTC	3173180	+	TRUE	parE	TRUE	3171526	3173418	-	-5.44796889931569	9.13850100438232e-70	0.757306822557039
GTCGGCATCATCGAACCTGA	2703069	+	TRUE	lepB	TRUE	2702357	2703331	-	-5.44683273600409	3.55360180442792e-20	0.757345154211109
TTCACTACAAAACTGCCACC	3325217	+	TRUE	rlmE	FALSE	3325057	3325686	-	-5.44576844101856	1.47515252277115e-11	0.757381064705868
ACGTAGGTCTGGTACTCTTC	134081	-	TRUE	acnB	FALSE	131615	134212	+	-5.44438744784618	2.14364637169027e-10	0.75742766602576
CTCCACAGCTTCAGCGGGAC	1097947	-	TRUE	ghrA	FALSE	1097109	1098047	+	-5.44368690078678	5.54117858637555e-35	0.757451308029255
GTAGCGCGCCGACTAATCCA	3208322	+	TRUE	tsaD	TRUE	3207552	3208565	-	-5.4427703589482	5.52850190949044e-81	0.757482241635195
ACGTGGTCGTACAGCGCAGG	2343181	-	TRUE	nrdA	TRUE	2342887	2345172	+	-5.4403824286242	4.74247270295604e-32	0.757562846982294
TGCTGCTTTGTAAAGCACCG	3208694	-	NA	NA	NA	NA	NA	NA	-5.43783953485929	4.30676869261832e-19	0.757648702032515
AACAACGCCGTTAACAACGA	2635922	+	TRUE	bamB	FALSE	2635496	2636674	-	-5.43596746585844	1.1993931513777e-69	0.757711920641241
CTGGAGCCGTACTTTACGGA	3720526	-	FALSE	glyS	TRUE	3720351	3722420	-	-5.43375150671161	7.09644275275975e-36	0.757786765843155
GCATACTTATCGCTAATAAA	200094	-	TRUE	bamA	TRUE	197928	200360	+	-5.43180845162046	1.05630984132801e-06	0.757852405732893
TGCCAGGCGATCACCGGATC	2698958	+	TRUE	acpS	TRUE	2698640	2699020	-	-5.43117124412824	6.13109090413342e-35	0.757873934222229
CGGTTTAACGGATTATGCTC	105097	+	FALSE	ftsA	TRUE	103982	105244	+	-5.42841678493328	1.48247248660839e-10	0.757967009575998
CGTTCGCGCAGATCAGATCA	3811791	-	TRUE	dfp	TRUE	3810754	3811974	+	-5.42794117982445	3.99499830155297e-07	0.757983082963171
CCTGATGGTGTTAGGCAACA	2282270	+	FALSE	yejL	FALSE	2282151	2282378	+	-5.42639259302821	3.26729995720318e-20	0.758035423195297
AAGCGTGAGGCCAGCGGTAG	1323420	-	TRUE	yciQ	FALSE	1322770	1324665	+	-5.42438884381629	3.72065914573218e-32	0.75810315805721
TGCAAAACGATTGATGGATA	1772581	+	FALSE	ydiB	FALSE	1771813	1772679	+	-5.42369511586773	1.1207093827369e-17	0.758126611700596
TTTTTGGTCCAGCCGCTGCC	2963917	+	TRUE	lgt	TRUE	2963184	2964059	-	-5.41845936069096	3.73387052765505e-70	0.758303669600427
GTGGCTGAACCCGCCTGACC	2262887	-	TRUE	setB	FALSE	2261885	2263066	+	-5.41126516551175	2.77349678195621e-144	0.758547091137048
ATTCCCTCTACATTCATAGA	2633877	+	NA	NA	NA	NA	NA	NA	-5.41044323462026	9.33640935659072e-07	0.758574911795495
TCTTCAATAAACGCACGGCG	3875783	+	TRUE	gyrB	TRUE	3875728	3878142	-	-5.40931360758563	0.000145873103169005	0.758613150660957
AAGATGAGTCAGATTTTGCC	927855	+	TRUE	cydC	TRUE	926697	928418	-	-5.40784724157549	1.60526499851697e-29	0.758662794186593
AGCAGGATTTCACCGCTGTC	2343741	-	TRUE	nrdA	TRUE	2342887	2345172	+	-5.40502914648091	1.14377330707092e-39	0.75875821847213
TGCCTGCTTTGGTTTTGATC	643734	-	FALSE	rna	FALSE	643420	644226	-	-5.40457498412817	2.87479087064404e-21	0.758773599233332
ATTGGTCGCGATGCATTGGT	35079	-	FALSE	caiE	FALSE	34781	35371	-	-5.40448421879622	4.94764227544279e-56	0.758776673186605
CGTTAATGCCTTTTACCACA	1795314	+	TRUE	pheT	TRUE	1793581	1795968	-	-5.4036680237464	4.50755652068771e-16	0.758804316417344
CATGCGGTGACGCCAGGCTG	421910	-	TRUE	malZ	FALSE	421742	423556	+	-5.4016627042258	1.15226762000953e-18	0.758872241960556
GGAGAGATCAATCCCACCGG	4450826	-	TRUE	ytfT	FALSE	4450597	4451619	+	-5.3994002825218	4.54201438933968e-07	0.758948890844415
AGGTTGCATGAAAACGCGAG	2945386	+	NA	NA	NA	NA	NA	NA	-5.39913604536223	0.000148336180311581	0.758957843979874
GCGGGAGATGTGGCGATGCT	4252606	+	TRUE	plsB	TRUE	4252066	4254489	-	-5.39448255528325	2.65770897989923e-36	0.759115552593529
GCAAGGGCGGGATCGATGCT	1243865	-	NA	NA	NA	NA	NA	NA	-5.39403580276459	5.36644588348194e-19	0.759130696660819
TCATCAGCAGCCCGAGGAAC	4484441	-	TRUE	lptF	TRUE	4484241	4485341	+	-5.39300919931726	4.97389253518073e-13	0.759165498869992
TCTTCTTCCGCGTACAGCAG	3323414	+	TRUE	ftsH	TRUE	3323023	3324957	-	-5.38781999641472	2.35266330353264e-37	0.759341463470872
GCTGCTGGAAACGGTCGGTC	3709538	-	FALSE	yhjX	FALSE	3708822	3710030	-	-5.38613294916649	3.66761801067681e-21	0.759398688402454
CGGATGCGAAAACTCGCATC	555231	-	NA	NA	NA	NA	NA	NA	-5.38349874470085	1.19085219933464e-15	0.759488058319062
TGACCGATCACATAGTCGTC	23408	-	TRUE	ileS	TRUE	22391	25207	+	-5.38341950479376	2.70625777946237e-68	0.759490746995077
AGAAACGATCGGGTACTGTT	2905121	+	TRUE	eno	TRUE	2904665	2905963	-	-5.38319429725462	4.47180653913075e-07	0.759498388578306
TCACCAGACGCTGCCATGTA	2907156	+	TRUE	pyrG	TRUE	2906051	2907688	-	-5.38255707948682	1.05497511242312e-62	0.759520011034851
CGCCGGTTTACCGTTGTTGC	25908	-	TRUE	fkpB	FALSE	25826	26275	+	-5.38128056906096	5.9918279502875e-38	0.759563330058073
AGTGGTGGGTGTTCCGGTTC	3898390	-	FALSE	yieL	FALSE	3897431	3898627	-	-5.38023035708349	1.114712343582e-40	0.759598973234848
AGCAGCGCCCAGAGAGTGAC	2438635	+	TRUE	fabB	TRUE	2438407	2439627	-	-5.37772194721317	5.65671734255496e-14	0.759684119773287
GTCGGCGGCGCACGGTATCG	3162933	+	TRUE	parC	TRUE	3161737	3163995	-	-5.37718168861754	4.3173293925648e-11	0.759702461040806
GCATCGGCACTTTTCCTGAC	2344998	-	TRUE	nrdA	TRUE	2342887	2345172	+	-5.37621520088857	5.81581990234701e-39	0.759735274593038
TGCAATCAAAGGTGTTATCC	4017264	-	TRUE	ubiE	FALSE	4016878	4017633	+	-5.37287545617976	4.14540033179827e-27	0.759848685221386
ACTGTTGCGCTGGTACAGCT	680118	+	FALSE	djlC	FALSE	679435	680886	+	-5.37244624269919	1.55140759881307e-15	0.759863262853861
GCCGATAAAGCCCGCGCCGC	3792023	-	TRUE	rfaD	FALSE	3792010	3792942	+	-5.37014751061124	4.24880748940992e-70	0.759941345578346
ATCACTCTGGCAAGGATGTT	3988822	-	NA	NA	NA	NA	NA	NA	-5.36793740270302	1.44625132494147e-18	0.760016433072889
GCGTACTACCTCTTCCATGG	95959	-	TRUE	murF	TRUE	94650	96008	+	-5.36775982017305	2.83069303437363e-80	0.760022467009326
GGCAGAACCACACCCAGTGC	773069	-	TRUE	cydB	FALSE	772265	773404	+	-5.36627903513384	4.08908721494058e-41	0.760072785164476
GAGTGGCACCGAAGCCCATA	3439388	+	TRUE	rpsD	TRUE	3439077	3439697	-	-5.36335807032116	2.24040533575218e-19	0.76017206121477
CTCATCCAGACATCGAGCAG	2630154	+	TRUE	guaA	FALSE	2628980	2630557	-	-5.36136566128565	6.36430923816106e-07	0.760239792931439
GGAACTTACCGGGAACAGAC	2704256	+	TRUE	lepA	FALSE	2703347	2705146	-	-5.36063098143363	7.63587774625387e-05	0.760264771334734
CGCCACTGTTTACCATACAC	2962903	+	TRUE	thyA	FALSE	2962383	2963177	-	-5.35689144757132	5.95439373455273e-170	0.760391937307847
AGCATGATTGCGCCAATTTC	26102	-	TRUE	fkpB	FALSE	25826	26275	+	-5.35661009499598	3.65869912300962e-24	0.760401506657982
GATCTCTTCGATGTCTACCC	3084909	-	TRUE	metK	TRUE	3084728	3085882	+	-5.35524615225575	8.59768313655877e-26	0.760447900426479
ACCTTCTGCGATGACGTTTA	3332144	-	TRUE	ispB	TRUE	3331732	3332703	+	-5.35400519058874	5.19964302922388e-20	0.760490115979626
CAACGCCGGTAGTCCTGCCG	100452	-	TRUE	murG	TRUE	99644	100711	+	-5.3527956588425	1.67638970849833e-16	0.760531266847376
TGGAAGTGGGTGATTTTGTC	2962575	-	FALSE	thyA	FALSE	2962383	2963177	-	-5.35268569450998	2.14623030256915e-44	0.760535008290988
GACACTGCCAGCGCCATTTG	929761	+	TRUE	cydD	FALSE	928419	930185	-	-5.34976370652156	8.1638583377661e-110	0.760634439953362
TGTTTTGCGGACCTTCCACC	3858080	+	TRUE	yidK	FALSE	3856424	3858139	-	-5.34710599632246	3.06700374253701e-163	0.760724901148166
ATCGGGTCGGTCACTGTGGT	3884545	-	TRUE	yidC	TRUE	3883099	3884745	+	-5.34620386443887	6.65356829298616e-59	0.760755612144635
CCTGGATCGACGTTGATGTA	2907561	+	TRUE	pyrG	TRUE	2906051	2907688	-	-5.34609692843815	4.63530587804614e-17	0.760759252698194
GTGCGCGCGGATGCTCAGCC	2154789	+	FALSE	mdtB	FALSE	2153287	2156409	+	-5.34114514067879	5.40805379326535e-67	0.760927870659878
GGATCACGGAGTGCTCCTGC	3472355	+	TRUE	rpsL	TRUE	3472200	3472574	-	-5.34065147472518	2.86768300464895e-38	0.760944685038963
CCTGGATATCACTTTTTGTT	434766	-	TRUE	nusB	FALSE	434361	434780	+	-5.33981841262674	0.000154399919463901	0.760973061016082
ATTCTGTGGGGAACGGGGGC	600949	+	FALSE	cusA	FALSE	597937	601080	+	-5.3328884260632	1.00773411827576e-09	0.761209194067367
CAGTTGCTCGTACATGGTTG	192393	-	TRUE	pyrH	TRUE	191855	192580	+	-5.33261556271831	1.47721031009658e-47	0.761218494638824
AAAACTGGAGCGAGAGTATC	1682933	+	FALSE	tus	FALSE	1682283	1683212	+	-5.33257047910704	4.50634900403424e-08	0.761220031339614
TTTACCCAGTACGTCACCGA	3163798	+	TRUE	parC	TRUE	3161737	3163995	-	-5.33036414801591	1.91770992188784e-45	0.761295242984673
CGTAAATCATTCGCCTGCGC	3329807	+	TRUE	yhbE	FALSE	3329792	3330757	-	-5.32988405730304	1.41075475442718e-28	0.761311610771222
ATGGCGGGCGGCGGCGCTGC	541862	+	FALSE	glxK	FALSE	541112	542257	+	-5.32853948107876	7.08181423304524e-49	0.761357455305388
TGCCCCTCTCCTCACGGAGA	3772381	+	NA	NA	NA	NA	NA	NA	-5.32714796722179	0.000146001189411404	0.76140490603446
GTGCCAATCGGCGCATCCGC	1795556	+	TRUE	pheT	TRUE	1793581	1795968	-	-5.32628452504895	1.13042777362099e-174	0.761434352452459
CCGATGGTTGACGGCGTGGC	1190689	+	TRUE	purB	TRUE	1189839	1191209	-	-5.32585354788523	1.48426399576598e-118	0.761449051143233
GTTAACGTCGGTCTGCTGAG	12986	-	TRUE	dnaK	FALSE	12163	14079	+	-5.32579404349458	3.11514142753655e-114	0.761451080614692
TGCCGCCGGGCGATAAACGT	2745407	+	TRUE	ffh	TRUE	2744456	2745817	-	-5.32554641106044	6.99965045579347e-26	0.761459526543902
TGCAGGGCGTGACGCTCTTT	285033	-	TRUE	yagG	TRUE	284619	286001	+	-5.32504828176763	3.40471970284375e-99	0.76147651666597
CAGAACGTCCATAGCCGCAA	987081	+	TRUE	asnS	TRUE	986808	988208	-	-5.3229864108172	3.24696928911031e-22	0.76154685072792
GCTTGATTTGGTCTTCCGGC	3820464	-	TRUE	spoT	TRUE	3820423	3822531	+	-5.32215453723745	1.22228805536903e-34	0.761575231084476
GCAGCCTGACGGTCCACGAT	20912	+	TRUE	rpsT	FALSE	20815	21078	-	-5.3217264463629	3.79426242474575e-38	0.761589836738187
CCATCTTCATCTCTTTCGGC	2629468	+	TRUE	guaA	FALSE	2628980	2630557	-	-5.31917129867124	6.32870957621182e-64	0.761677025213391
GCCGCTCTGCTTCGCCTGAG	2948420	-	TRUE	argA	FALSE	2947264	2948595	+	-5.3187294972631	2.43058470421956e-74	0.761692102683743
CGTTGATTATACCGAAGGTC	176879	+	FALSE	erpA	TRUE	176610	176954	+	-5.31822076356499	0.000110742241051689	0.761709465109015
CGCAGAGTTTAACCTCTTTC	4403723	-	TRUE	purA	FALSE	4402710	4404008	+	-5.31762969923213	1.71107953370213e-09	0.761729638366789
CATTGATGCCACCCAGCCGC	1154925	+	FALSE	tmk	TRUE	1154347	1154988	+	-5.31750130569519	1.83869236227961e-83	0.761734020629889
CAAATTTCAATGCCGCCACA	93741	-	TRUE	murE	TRUE	93166	94653	+	-5.31725140935458	3.94931524078834e-17	0.761742550109653
ACGCACGGTGCTGGAACCAC	199888	-	TRUE	bamA	TRUE	197928	200360	+	-5.3146551023564	1.50494383249674e-22	0.761831178748751
GTCGGTCTGCCGATAGGTCC	1398293	-	FALSE	abgT	FALSE	1398271	1399797	-	-5.31396012074962	7.99427080081894e-54	0.761854906435537
CCACGTTTGGCGGCCGGGAT	2344381	-	TRUE	nrdA	TRUE	2342887	2345172	+	-5.31294676979221	2.69868643920659e-69	0.761889506365649
CGTCGATAAATACGTCCGCC	669823	+	TRUE	holA	TRUE	669797	670828	-	-5.30774341867238	1.06914084915881e-42	0.762067219482648
TGGTATGACGCCGGTTTGTT	3969837	+	FALSE	wecC	FALSE	3969283	3970545	+	-5.30616276191197	1.08781258638168e-85	0.762121221003
CAACAATTCAATGGCTTTGT	401944	-	TRUE	phoA	FALSE	400971	402386	+	-5.3059177693417	2.80182584382428e-37	0.762129591608447
TCAGCGCGTTCCAGCATATA	167949	-	TRUE	fhuA	FALSE	167484	169727	+	-5.30563465931172	3.81617408544643e-32	0.762139264793489
TAATCCCTGGGATTGCCTGC	3794073	-	TRUE	waaC	FALSE	3794002	3794961	+	-5.30379224123377	3.59598135167135e-30	0.762202221762608
CGTCATACACTTCCTGCGCT	3194022	+	TRUE	rfaE	FALSE	3193342	3194775	-	-5.30227075684815	4.51938957178959e-108	0.762254220000444
TCATCCGCTTCGTAGATTTC	206569	-	TRUE	dnaE	TRUE	205126	208608	+	-5.3021443146893	1.57356958671766e-27	0.762258541605928
TATCTACCGTCTGGCTCGCT	4018776	+	FALSE	ubiB	TRUE	4018249	4019889	+	-5.30184669201641	1.15348707123939e-46	0.762268714100956
CAGTAATGCTTTAGCCGTTT	4170792	-	TRUE	murB	TRUE	4170080	4171108	+	-5.30099756144941	1.59356504186123e-23	0.762297738168764
TGCTGCACACGTCGAGGTTC	4125128	-	TRUE	rpmE	FALSE	4125036	4125248	+	-5.29600702147369	4.89549917092934e-125	0.762468364116812
GACCGACGCTGGTTCCGGTA	2412792	-	TRUE	pta	FALSE	2412769	2414913	+	-5.29509976202026	1.69502200271937e-51	0.762499391411539
TGACCCGGCAGCAGATGCAT	968207	-	TRUE	lpxK	TRUE	967589	968575	+	-5.29336567057844	1.25256101426081e-37	0.762558702494871
TATCGGTATACATCCCCGGA	3173355	+	TRUE	parE	TRUE	3171526	3173418	-	-5.29235074187968	2.4718024795731e-12	0.76259342035485
CGGCATGCTGGCGACCACCT	4282307	-	FALSE	actP	FALSE	4281276	4282925	-	-5.29233505848544	7.28259890055949e-50	0.762593956864517
CACGGATAGAACCGCCAGGC	4204064	+	TRUE	purH	FALSE	4203966	4205555	-	-5.28827561999081	2.65234079977516e-21	0.762732850663079
AATGTTGTTTTACCCATCGA	4263033	-	TRUE	dnaB	TRUE	4262337	4263752	+	-5.28694835946968	1.80373761140893e-19	0.762778273893955
CCATATCTTCGGTACGGATC	3821382	-	TRUE	spoT	TRUE	3820423	3822531	+	-5.28205950389006	4.94209418901213e-20	0.762945633325864
GATATACACCTTGCCGCGAC	2336738	+	TRUE	gyrA	TRUE	2334815	2337442	-	-5.28148561084102	2.38274165137421e-30	0.762965284133868
AGCGTTTACCGTGCTTCGCC	2344455	-	TRUE	nrdA	TRUE	2342887	2345172	+	-5.27955809270404	6.84503304253189e-93	0.763031292149688
GCCGGGCTAACCGTTCAGGT	3990566	+	FALSE	cyaA	FALSE	3989176	3991722	+	-5.27789863801104	1.99747253094865e-80	0.763088129460928
GAGTATCTGGCTGCGCGTTA	3333763	+	TRUE	murA	TRUE	3333257	3334516	-	-5.26912614952332	4.41571582824774e-19	0.76338873316607
GTTTTCCTGAGTTGCCAGCC	2660869	+	TRUE	trmJ	FALSE	2660605	2661345	-	-5.2655617166781	4.45304175125965e-25	0.763510941979339
TGCTGCACCCAGAAATCCAT	127760	-	NA	NA	NA	NA	NA	NA	-5.26492969661418	1.46418612703068e-34	0.763532615267372
GTTAATCATAATTCGACGCT	772395	-	TRUE	cydB	FALSE	772265	773404	+	-5.26463017066237	2.27348368445317e-24	0.763542887067603
CGATAGCACGGTGGCGAAGC	73895	+	TRUE	thiP	FALSE	72911	74521	-	-5.26334977122354	1.38442841763743e-27	0.763586799591736
GGTGAACTCGAAGACCATGT	3721224	+	TRUE	glyS	TRUE	3720351	3722420	-	-5.25813469687313	3.67171472363917e-11	0.76376570775215
GACGAGTTCGCCACAGCTGT	772052	-	TRUE	cydA	TRUE	770681	772249	+	-5.25642442999883	9.60894485282972e-24	0.763824398365002
CGCCACATAAGCGTGACCTT	554222	-	TRUE	cysS	TRUE	553834	555219	+	-5.25185075633453	1.73132814378317e-17	0.763981395801899
ACCTCCGTGATGGTTGCCGA	3340215	+	FALSE	kdsD	FALSE	3339288	3340274	+	-5.24916518785825	1.1550749943623e-12	0.764073611592276
ATGCCAGTTCAGCTCCTTCG	1348976	+	TRUE	fabI	TRUE	1348275	1349063	-	-5.24711831525776	9.63726421529695e-46	0.764143911094359
TTCCGGCTCTTTCAGGGTAG	3720612	+	TRUE	glyS	TRUE	3720351	3722420	-	-5.24012725192259	1.17478806605609e-26	0.764384115586857
TCACTTTGTCGCCCTTACGC	2704498	+	TRUE	lepA	FALSE	2703347	2705146	-	-5.23282518067631	6.21833274260791e-31	0.76463516722902
CAGAACCAGCGCGATGTTCG	3449123	+	TRUE	rplB	TRUE	3448565	3449386	-	-5.23219548998314	5.83601815234194e-17	0.764656824273584
ATTCTCCTGATGGATGGTTC	2869829	+	TRUE	ispD	TRUE	2869802	2870512	-	-5.23123648018007	2.87726810157849e-15	0.764689809995773
CAGGACGTTGTCCCAGCCGG	3209613	-	TRUE	dnaG	TRUE	3209129	3210874	+	-5.23092160252222	4.18772561426513e-54	0.764700641023864
CTGACATCCGCCTTCGAGAC	3988082	+	TRUE	hemC	TRUE	3987848	3988789	-	-5.22995617218514	6.88068513179243e-33	0.764733851399625
GAGCCACGGCCTGGCCCTAC	206194	-	TRUE	dnaE	TRUE	205126	208608	+	-5.22950583401953	8.60717606222029e-40	0.764749343819582
CGGTCCCGATCCCTGGTCGG	2662558	+	FALSE	yfhR	FALSE	2662385	2663266	+	-5.22693944005355	9.4743915024739e-102	0.764837644240194
CCGCGGTGATCAGCCAAACC	772444	-	TRUE	cydB	FALSE	772265	773404	+	-5.22604334711601	4.90806411631814e-35	0.76486848039041
TGTCGGCGTTACGCGCATCG	1176366	-	TRUE	lolD	TRUE	1175842	1176543	+	-5.22557895909332	2.57129320981722e-171	0.764884461785625
GGAGAACACAAACGCCCACG	773127	-	TRUE	cydB	FALSE	772265	773404	+	-5.22409581007836	6.79718381045775e-13	0.764935507175536
CTGTACATTACGTTCATTAC	4435129	-	TRUE	cysQ	FALSE	4434778	4435518	+	-5.22350463845181	1.07580409706184e-20	0.764955855368827
CACCGGATTACGTATTGGTC	386815	+	FALSE	tauC	FALSE	386195	387022	+	-5.22315071760229	7.28813273508296e-93	0.764968037881992
ACGAACCAGCGCGGAGCCCC	1148907	-	TRUE	fabH	FALSE	1147982	1148935	+	-5.22156121007079	2.77796183328065e-26	0.765022756020203
TATTCGCTTTCGCCGCGCCA	439079	+	TRUE	dxs	TRUE	437539	439401	-	-5.21840348384577	4.15652687255978e-48	0.765131482663014
TCAGGATCTGCTGACGTTCC	4183831	-	TRUE	rpoC	TRUE	4183373	4187596	+	-5.217559889862	1.38578674269062e-24	0.765160534472429
ATCGCAAGGTGGATCTGTTC	692357	+	TRUE	ybeZ	FALSE	691561	692640	-	-5.21477007434	3.21073058758548e-28	0.7652566262496
CTCGTAGATTTTACGGATCT	3163318	+	TRUE	parC	TRUE	3161737	3163995	-	-5.21449893849063	3.9808582765883e-20	0.765265966478516
ATCTACGGTGAAGTACGGGT	199348	-	TRUE	bamA	TRUE	197928	200360	+	-5.20477126947952	9.8909296028443e-21	0.765601221182878
CATACGCGCGGCAACCTTTG	321133	-	TRUE	ykgE	FALSE	320832	321551	+	-5.20157379846794	4.47449377965828e-16	0.76571148308293
ACTGCGCTTAACACCCACAT	1683363	-	FALSE	fumC	FALSE	1683209	1684612	-	-5.20124402780302	6.00099523356054e-73	0.76572285673319
GGTCAGGGTTTTTCCTTCAC	108589	-	TRUE	secA	TRUE	108279	110984	+	-5.20069824175837	1.11888188133334e-21	0.765741681404591
CTCATGCGTACAGAATATTG	1948527	-	FALSE	aspS	TRUE	1946774	1948546	-	-5.19693336767434	2.9481728038764e-54	0.765871560652487
CACCATTCCCGTGCCGGGAA	3254473	+	TRUE	yhaM	FALSE	3253363	3254673	-	-5.19506027397802	7.52055334450199e-12	0.765936194367139
GTTGCGGCGCAAATCCTCGC	979937	-	TRUE	mukB	TRUE	975549	980009	+	-5.19191029080034	2.32135818029698e-103	0.766044913539839
GTGCTGGCAACGGTAGTCGA	2817605	-	FALSE	alaS	TRUE	2817403	2820033	-	-5.19142805394464	4.26693854836049e-34	0.766061560286931
AGCAACCAGTGGCTTCACAC	3461751	-	TRUE	gspK	FALSE	3460946	3461929	+	-5.18912092186415	1.85919536244634e-31	0.766141212167129
CCTTCTGGACCCGTTCAACC	2708007	+	TRUE	rpoE	TRUE	2707459	2708034	-	-5.18522634038984	1.2898127933241e-36	0.766275707047904
GCTGCGCCAGTTTTTCTTCC	3033988	+	TRUE	prfB	TRUE	3033206	3034304	-	-5.18406568072843	1.26984566564261e-64	0.766315798224854
GTTCATCAAGTAGCGCTTGT	2634080	+	TRUE	der	TRUE	2633906	2635378	-	-5.17585975927293	5.73496627729149e-50	0.766599364558633
CCGTACCCGGTTGACTGCTG	50005	-	TRUE	folA	TRUE	49823	50302	+	-5.175797939026	1.33833951845145e-90	0.766601501634474
CGTCAGGTTGATGCGGTGAT	1265187	-	TRUE	prfA	TRUE	1264235	1265317	+	-5.16914363314479	1.01155416078056e-34	0.766831605285083
GGATGTCCTGTACGGATAAC	2261511	+	TRUE	fruB	FALSE	2260387	2261517	-	-5.1689274398993	1.6269956317378e-12	0.766839083491412
CTGCTGTACAGAAGCATTCA	3811532	-	TRUE	dfp	TRUE	3810754	3811974	+	-5.16761346321638	5.31582550773223e-26	0.766884537580412
CGCCGCCTGGATCAACGGTA	3208401	+	TRUE	tsaD	TRUE	3207552	3208565	-	-5.16667951158099	1.3405550607938e-09	0.766916848827915
CAGTTTCTTCGGTCAGAGCA	3307462	+	TRUE	pnp	FALSE	3307055	3309190	-	-5.1584622212784	4.68856137171661e-17	0.767201253870189
TGCCGCTGCAAAGGTCGTGC	3321018	+	TRUE	glmM	TRUE	3320755	3322092	-	-5.15673191671377	6.8228919872815e-42	0.767261167572108
AGGCGGCTTCGCCGAAGGTC	1700679	-	TRUE	add	FALSE	1700257	1701258	+	-5.15253019260277	5.28888226579137e-06	0.767406695858006
CAGGCCGTTTGCGACCAGCT	932591	-	TRUE	ftsK	TRUE	932447	936436	+	-5.14635390177258	1.01639276558644e-44	0.767620714244945
AATCATGAAATTCATATTGT	1321499	+	FALSE	yciV	FALSE	1321244	1322125	+	-5.14522252223798	4.29623853820949e-14	0.767659931297994
ATCGAGAAAAACATCGACAC	3819734	-	TRUE	gmk	TRUE	3819451	3820074	+	-5.14150690443422	7.3349091876185e-06	0.767788754097647
TTCAGCGATCAGTTTACCTA	4369517	-	TRUE	groL	TRUE	4369048	4370694	+	-5.14137157997981	1.27796592561346e-16	0.767793446697375
TCCGCCTTTTATTATGGTTC	4048829	-	NA	NA	NA	NA	NA	NA	-5.14092993903139	4.74345297092156e-28	0.767808761728267
TAGTGGCTCCCGTAGTGGTC	4031491	-	TRUE	trkH	FALSE	4031168	4032619	+	-5.14024366353078	5.19653357763487e-14	0.767832561301132
TCTACAGCGCCGACTGGGAC	4586031	-	FALSE	yjiA	FALSE	4585932	4586888	-	-5.14014724446899	1.83848085517696e-18	0.767835905167564
AGTAGTCGCTGTGCACCCGC	205149	-	TRUE	dnaE	TRUE	205126	208608	+	-5.13766067335744	1.84552051367859e-115	0.767922150891915
CCTCTCCCCGGTGGGGCGAG	631310	+	NA	NA	NA	NA	NA	NA	-5.13624458484713	1.36861114326871e-09	0.767971276014766
CTAACAATACAAGACGTTCG	2637673	+	TRUE	hisS	TRUE	2637323	2638597	-	-5.13604152441628	4.39079570295623e-38	0.767978320841548
ATTGGTTCGTGCCAGCAGTC	1667476	+	TRUE	ynfL	FALSE	1666723	1667616	-	-5.13019370087025	2.5574708173304e-20	0.768181256331773
ATAATCGCTTTTTCAACGGC	193097	-	TRUE	frr	TRUE	192872	193429	+	-5.12839337881137	5.5401990424282e-05	0.768243754030423
ATTGTATTTCCCCAACTTAT	2531765	-	NA	NA	NA	NA	NA	NA	-5.1225124692094	5.78084342559958e-15	0.768447979119052
ATACGTTCAGCCAGTTCTTC	3212506	-	TRUE	rpoD	TRUE	3211069	3212910	+	-5.12053672428728	5.13987816172192e-118	0.768516614758937
CAACGTCTGAACCGGTTGAA	975261	-	TRUE	mukE	TRUE	974872	975549	+	-5.11962598619563	1.93650361742321e-08	0.768548257127373
CCAGTTCAGCGGCATCGGCC	3348244	+	TRUE	elbB	FALSE	3347828	3348481	-	-5.11947782333234	2.21800584707134e-37	0.768553405092947
CCTGACCCCGCTGGAAGGTC	2412205	+	FALSE	ackA	FALSE	2411492	2412694	+	-5.11639212108235	3.81194320318088e-13	0.768660634470974
CGCGCCCAGACCACCGGTAC	3785717	-	TRUE	envC	FALSE	3784861	3786120	+	-5.11603443985707	2.87203168818769e-57	0.768673065970767
CCACCAGACACTCCGTATCC	1265592	-	TRUE	prmC	TRUE	1265317	1266150	+	-5.11486395265663	4.52493044111671e-91	0.768713750009654
CCGATTGCCATTTTGGTATG	1800332	+	TRUE	thrS	TRUE	1798666	1800594	-	-5.11415264266132	2.49952713688143e-18	0.768738475975091
GCATCAGACGCAGTGCTTTG	209040	-	TRUE	accA	TRUE	208621	209580	+	-5.11251459303364	9.38012380780865e-31	0.768795422541211
CCCACGTTGACGATTTCGCT	961908	-	TRUE	rpsA	TRUE	961218	962891	+	-5.111161262963	6.42270834900908e-134	0.768842477236852
CAGCGATACCCGCTGCAGCC	3440394	+	TRUE	rpsM	FALSE	3440137	3440493	-	-5.11089619874119	3.23293069065697e-17	0.76885169407868
GGCGCTTTAATGCCCGGATG	2962417	+	TRUE	thyA	FALSE	2962383	2963177	-	-5.1099404137314	2.62833152322575e-15	0.768884930573677
CGTACAGCCAGCCAGAATCC	3332276	-	TRUE	ispB	TRUE	3331732	3332703	+	-5.10910988396003	2.03222609457279e-10	0.768913813772908
CGCACCCATCAATGCACGGT	4181294	-	TRUE	rpoB	TRUE	4179268	4183296	+	-5.10863248002828	9.11333629501899e-10	0.768930417354256
GGCTTTGTGCCGCCTCTACC	131183	-	FALSE	yacH	FALSE	129407	131260	-	-5.10650073147153	1.72149065415312e-107	0.769004565964538
TATCGCCGTTCAGACCCGCA	3925861	-	TRUE	asnA	FALSE	3925178	3926170	+	-5.10210087579999	2.08550598449103e-39	0.769157651371215
CAGCAACGGAGCATTGAACC	3211452	-	TRUE	rpoD	TRUE	3211069	3212910	+	-5.10188788256397	1.14152545652936e-38	0.769165063651019
TGACCAGCGCCATCACCCCG	1174754	-	TRUE	lolC	TRUE	1174650	1175849	+	-5.10105778605058	4.21050282996445e-90	0.769193952822014
AGGTTCACAGACCGTACGAA	4019333	-	TRUE	ubiB	TRUE	4018249	4019889	+	-5.097991635842	0.000320978496026969	0.769300680358062
CTCGCGGCCCATTTTGAGCA	4017173	-	TRUE	ubiE	FALSE	4016878	4017633	+	-5.09656474011635	4.8599628667939e-45	0.769350358299653
TGCCACGGAATGGAAAACGT	4016954	-	TRUE	ubiE	FALSE	4016878	4017633	+	-5.09496483055546	4.99169645813479e-13	0.769406067417244
ATCTTCACCTTTCAGCAGAC	2343920	-	TRUE	nrdA	TRUE	2342887	2345172	+	-5.09162091840507	1.07036088449409e-18	0.769522529052492
CAGCTTCAGCTCACAGCACC	2527872	+	TRUE	ligA	TRUE	2526183	2528198	-	-5.08636234845542	4.6720640907019e-20	0.76970574564484
GCGGAATGTAACCGAAGGTC	887752	+	TRUE	ybjL	FALSE	887357	889042	-	-5.07861776450317	4.82274532213757e-07	0.769975737671934
GCGCACGGGCGATAGCCAGA	926975	+	TRUE	cydC	TRUE	926697	928418	-	-5.07708137185985	0.000308160183393398	0.770029321976805
GCCATGTTGACGGACGACGC	2326014	+	TRUE	yfaP	FALSE	2325389	2326165	-	-5.0765874955252	1.0338807275776e-45	0.7700465483375
TCTTTCTTATAGGTATCGAT	2344621	-	TRUE	nrdA	TRUE	2342887	2345172	+	-5.07506726146145	1.74933904083039e-08	0.770099578798499
ACAGGGATTTACCCACATCG	3069966	+	TRUE	pgk	TRUE	3069481	3070644	-	-5.07046609829936	2.99527379704234e-19	0.770260126101729
GGGTACCGCCCTGCATCGTT	3172605	+	TRUE	parE	TRUE	3171526	3173418	-	-5.06964345540438	1.43307643775936e-217	0.770288837440963
GCCTGGCCGGAACTGCATCC	2702826	+	TRUE	lepB	TRUE	2702357	2703331	-	-5.06959437095592	9.66665005923488e-72	0.770290550621645
GCGATCGGCAACACGAGTTT	927432	+	TRUE	cydC	TRUE	926697	928418	-	-5.06911411588971	1.53686449640511e-21	0.77030731323103
CACACCTTCTCGCCGGGGGC	4099809	+	FALSE	kdgT	FALSE	4099713	4100696	+	-5.06809223803372	1.66489203112932e-70	0.770342982829345
TTCGTCTGCCCGGCAAACTG	3172439	+	TRUE	parE	TRUE	3171526	3173418	-	-5.0679118600188	2.87921630089174e-33	0.770349279434974
AGGTGGAGAACTTGTAACCA	3212334	-	TRUE	rpoD	TRUE	3211069	3212910	+	-5.06750952993547	2.63169066650622e-08	0.770363324277205
TAGACCAGGTAGTACACGTT	190769	+	NA	NA	NA	NA	NA	NA	-5.06750779365248	2.05348065933118e-68	0.770363384889793
CGCCAGGTGACGGCTGGTGT	987495	+	TRUE	asnS	TRUE	986808	988208	-	-5.06614604123611	1.16855317251129e-28	0.770410925778849
CCGGTACATAGCCTGCTTTA	1959141	-	TRUE	argS	TRUE	1958086	1959819	+	-5.06275327398038	6.85415527039608e-42	0.770529398071494
GATTTCGCCATCAATAAGCT	3988040	+	TRUE	hemC	TRUE	3987848	3988789	-	-5.05492044292735	1.97798536211756e-16	0.770803052497594
GGACATCCAGTCCTAACCAG	3051800	+	TRUE	pepP	FALSE	3051537	3052862	-	-5.05486110574692	2.72777629384896e-22	0.770805126293461
GGGCCTTCCGGATCGCCTTC	2704599	+	TRUE	lepA	FALSE	2703347	2705146	-	-5.05166277944366	5.56941297059963e-32	0.770916922230791
AGGGATCGCCGGAACGTCCC	3208263	+	TRUE	tsaD	TRUE	3207552	3208565	-	-5.04913456346861	1.37518343125631e-08	0.771005317740039
ATCCATCGCATTACCCATGG	1963676	+	TRUE	flhB	FALSE	1963067	1964215	-	-5.04554948574936	4.47405976410155e-103	0.771130699690162
TCTGAAAGCCTGGCGCGACG	282200	+	FALSE	yagE	FALSE	281502	282410	+	-5.04463567320984	2.22340180085016e-19	0.771162665240123
ATCTTCGCCGGTATTGTCGC	3441527	-	FALSE	secY	TRUE	3440788	3442119	-	-5.04184860330641	9.21636239830892e-97	0.771260174495977
GTGCGTCTGGGCTGGGACAG	2227968	-	FALSE	dusC	FALSE	2227460	2228407	-	-5.03707035838034	1.14702421309808e-33	0.771427404983312
TGTCAGACTTGCGTTCATCA	773220	-	TRUE	cydB	FALSE	772265	773404	+	-5.03617462744049	1.86131138168178e-111	0.771458762122478
GGGAACCCCACCGGACTTGA	4173484	-	TRUE	thrU	FALSE	4173411	4173486	+	-5.03552846657004	1.26691224978381e-10	0.77148138406531
AGCGCCACGCTGGCGGCCTA	3324193	+	TRUE	ftsH	TRUE	3323023	3324957	-	-5.03241294518661	6.7697249540452e-27	0.771590476371947
ATGCGAGGTTGCGGAAAAGC	3396621	+	TRUE	mreD	TRUE	3396409	3396897	-	-5.02738272601212	1.4560533816631e-08	0.771766678386385
TTCATCTTTGATGAAGTGCA	4480292	+	TRUE	valS	TRUE	4479005	4481860	-	-5.02361744523677	7.22961582553129e-19	0.77189862393277
ATACTCCGTAACAAATTACC	1889355	+	TRUE	yoaA	FALSE	1889349	1891259	-	-5.02341946672926	2.24806654742657e-09	0.771905562879637
CGCGCGAACCAGGTTTCGCC	433420	-	TRUE	ribD	TRUE	432679	433782	+	-5.02242921958163	9.58918565394474e-25	0.771940271915332
CGAACTGGTAACGAGGAATC	2557455	+	FALSE	intZ	FALSE	2556793	2558088	+	-5.02056440578932	4.28829635733208e-22	0.772005643757733
ATACCGCTGGAGAGCGAATC	2361936	+	TRUE	yfaZ	FALSE	2361755	2362297	-	-5.02018566693619	6.58337544166686e-07	0.772018921962401
TCTACAGCGCCCGCCAGCAC	1555156	+	TRUE	ddpF	FALSE	1555136	1556062	-	-5.01960636731777	1.1287745885461e-59	0.772039232510167
GATGCAATTCTGCCCGGATG	1843730	-	FALSE	topB	FALSE	1843023	1844984	-	-5.01524143518819	5.04478784791779e-35	0.772192303684117
CCCGCGGATCGTCATATTGC	47101	-	TRUE	yaaU	FALSE	45807	47138	+	-5.01270624078871	2.43140845514355e-206	0.77228123675678
TTGACACGTGAACCATCTGT	199686	-	TRUE	bamA	TRUE	197928	200360	+	-5.00837008037383	1.18438914364251e-32	0.772433394109449
GCTGAATGGCGTTACCGGCC	3298309	-	FALSE	yhbS	FALSE	3298277	3298780	-	-5.00550387549868	6.00910827531774e-31	0.772534003137647
ATATCGGCGTAAACCCATAC	2234840	-	FALSE	mglC	FALSE	2234765	2235775	-	-5.00367840905551	4.33339035052301e-09	0.772598094007942
GTTGTTGTCGGCGTTCATAA	95293	-	TRUE	murF	TRUE	94650	96008	+	-5.00309670136661	5.03848452574676e-43	0.772618519598841
AAGATTTGCGCTCTCCTGTG	2817772	+	TRUE	alaS	TRUE	2817403	2820033	-	-5.0016517527281	1.26029389783498e-12	0.772669260974558
GAATCGCTTCCAGCGTCATA	976274	-	TRUE	mukB	TRUE	975549	980009	+	-5.00104793082843	2.94881340675828e-07	0.772690466992673
GATCCGTTTGGCGCAGCTTC	1268030	+	FALSE	kdsA	TRUE	1267388	1268242	+	-4.99918745157526	6.95525946313556e-30	0.772755813705415
ATACAGATGCAGCGCTTCTG	1332321	-	TRUE	cysB	FALSE	1331879	1332853	+	-4.99321929575891	4.50030631911982e-23	0.772965511387331
TTTACCGTTATCCCCGCCAC	2046181	-	TRUE	yeeJ	FALSE	2042935	2050038	+	-4.98660258995899	2.50078926741929e-151	0.773198129653905
ATTCTGCCCGTTGCGGTACT	131529	+	NA	NA	NA	NA	NA	NA	-4.98206141253753	1.52312233479667e-76	0.773357861256088
TGCCGCCTTCTATGACAGTC	3173539	+	TRUE	yqiA	FALSE	3173447	3174028	-	-4.98102191380587	9.27623748283279e-14	0.773394433919499
GTTTAGTCGCGTTCAGTGCG	3809640	+	TRUE	rpmB	TRUE	3809461	3809697	-	-4.97696104394563	1.40297197687531e-71	0.77353734058164
CCCGCCATCAGTACGACCGC	2745519	+	TRUE	ffh	TRUE	2744456	2745817	-	-4.97374080813923	7.34711387081216e-78	0.77365070191886
CAGACGCTGCGTCGTTTCCT	4127640	+	FALSE	metB	FALSE	4126695	4127855	+	-4.97239082703507	4.01058641204373e-68	0.773698234926852
GCAGCCAGGCCGTCAGTTGT	927818	+	TRUE	cydC	TRUE	926697	928418	-	-4.97085590938585	9.94256434323201e-40	0.773752286670711
CGACGTTGAATACGCCGGAC	206778	+	FALSE	dnaE	TRUE	205126	208608	+	-4.96748343804496	1.03418659828612e-31	0.773871073941866
AATAAGCGGCGATACCTTCC	122409	-	TRUE	pdhR	FALSE	122092	122856	+	-4.9673219311202	7.08812650040198e-10	0.773876763553813
AACAATATTAATCCCTGCTT	1336708	+	TRUE	ribA	TRUE	1336594	1337184	-	-4.96588352616256	3.03292680463218e-09	0.773927439784158
CGTCGCCAACGCTCAGAACC	962693	-	TRUE	rpsA	TRUE	961218	962891	+	-4.96547817407045	8.3579967295898e-13	0.773941721881928
TTTGCTACGACGTAGAGTGA	1794754	+	TRUE	pheT	TRUE	1793581	1795968	-	-4.96507482963798	3.43574431682773e-20	0.77395593376543
CGCCACAGGCCGGAACGATC	3526429	-	TRUE	yrfF	TRUE	3524491	3526626	+	-4.96489911234993	1.19191548938078e-29	0.773962125345781
TGGCGGCGTGGCGCGAAGCG	969345	+	FALSE	ycaQ	FALSE	968612	969844	+	-4.96431964008098	1.35512124654603e-08	0.773982544352434
TCAGACCCATACAGGAGCGC	2630781	+	TRUE	guaB	FALSE	2630626	2632092	-	-4.96098221894135	4.32459117193351e-12	0.774100166855811
TGGTTAATGTAAGTCAGTAC	669194	+	TRUE	nadD	TRUE	669154	669795	-	-4.95896942676709	8.38115447250569e-18	0.774171122041715
CCGATTTCGGATCTTCCAGC	3511036	+	TRUE	trpS	TRUE	3510656	3511660	-	-4.95551561976695	1.99525622550845e-14	0.774292906366298
CTTACGAATACGTTTTTTCT	4179284	-	TRUE	rpoB	TRUE	4179268	4183296	+	-4.95345721237718	1.43293033823844e-41	0.774365505876475
CTGGCGTTTGGCGCCATTCT	1704438	+	FALSE	rsxB	FALSE	1704372	1704950	+	-4.9520577743023	2.01070302341802e-13	0.774414871479642
TCCATCACTTCACGCACTTG	1947822	+	TRUE	aspS	TRUE	1946774	1948546	-	-4.94998168796115	5.32721353185294e-34	0.774488117651777
CTGCGTATCTTCCACCGCAA	2818480	+	TRUE	alaS	TRUE	2817403	2820033	-	-4.94814717810624	2.76486171372363e-58	0.774552852322672
TGGCAGCGTGCATAATCCGC	433667	-	TRUE	ribD	TRUE	432679	433782	+	-4.94126692001399	5.02978110408599e-30	0.774795733627088
TTTTACCGCTTCAGGTGTGG	497331	-	TRUE	hemH	TRUE	497279	498241	+	-4.9403677641756	1.54653583135959e-30	0.774827486153524
TCAGTTCATCAACGTACGCC	705669	-	TRUE	glnS	TRUE	705316	706980	+	-4.93692403555987	7.99533124513973e-39	0.774949121054662
TTCCTGGGCCTGTGCAATGG	3314304	+	TRUE	nusA	TRUE	3314061	3315548	-	-4.93515405533222	8.61876163560503e-59	0.775011652852626
AACAGTCGGAGCTGCTGGGT	4395019	+	FALSE	amiB	FALSE	4394088	4395425	+	-4.93028842976894	1.36578563169863e-18	0.775183603008322
CGCATCGCCCTGGACAAACG	1176931	-	TRUE	lolE	TRUE	1176543	1177787	+	-4.92990716005142	1.68981837148956e-77	0.77519708022148
TTTGTTTCTCTTCGTCTGTC	4182270	-	TRUE	rpoB	TRUE	4179268	4183296	+	-4.92723995747297	6.0744771666625e-48	0.775291374243673
TCAATTTCCAGCCAGCTCAT	3432938	-	TRUE	fmt	TRUE	3432236	3433183	+	-4.9255916790684	9.34176542985555e-19	0.775349657552426
CCGTGCCAGCATCCAGGTTC	1115137	+	TRUE	lpxL	FALSE	1114885	1115805	-	-4.91953259540436	4.23196171479153e-73	0.775563982763219
CTTCCATTAACAAACGGTCA	3398203	+	TRUE	mreB	TRUE	3398066	3399109	-	-4.91760037258469	4.08402770557666e-14	0.775632355322264
CGCTTTCTGGTGAATGGTGC	696193	+	TRUE	leuW	FALSE	696186	696270	-	-4.91359986570316	9.71316227570712e-15	0.775773953352438
CAGAAGCGGGGCGCGCTGTC	557039	+	NA	NA	NA	NA	NA	NA	-4.90841108276968	1.65737820277393e-38	0.775957687473283
ACGCAGCAGGTTCAGCAGCT	3446734	+	TRUE	rpmC	TRUE	3446590	3446781	-	-4.90782734419538	2.99121304986678e-17	0.775978363025773
AGCTAAGCTCGTTACGAATC	218427	+	TRUE	proS	TRUE	217057	218775	-	-4.90777425927222	3.16270846522635e-29	0.775980243305864
CACCAGCACGCCACGATCGT	1889496	+	TRUE	yoaA	FALSE	1889349	1891259	-	-4.90114560315295	2.13856743299691e-182	0.776215103448864
AAGGCATGGTGGCGGAGTTC	196789	-	TRUE	rseP	TRUE	196546	197898	+	-4.88990685238756	1.10738865831509e-31	0.776613629040901
CCTGTCCCAGTTCTTCCAGC	434576	-	TRUE	nusB	FALSE	434361	434780	+	-4.88947640822353	1.33718474789205e-32	0.77662890070835
AATGTGCAGGAACAGGCTTA	1359203	+	FALSE	puuD	FALSE	1359144	1359908	+	-4.88881306640456	3.9382186630549e-24	0.776652436494694
AACTTGCGGCAGGAGCTGCA	3403556	-	TRUE	accB	TRUE	3403458	3403928	+	-4.8884439362406	5.89137047818189e-10	0.776665534083635
TCATGCCAAATCCGTGATCG	2945355	+	NA	NA	NA	NA	NA	NA	-4.88837812956671	3.69710542065216e-15	0.776667869102485
GCTGTCCATATCGTGACGCC	4046346	-	TRUE	polA	TRUE	4044989	4047775	+	-4.8790468765161	3.44024670788642e-66	0.776999112253238
ATGTCGGCCAAAGATTTCAG	4184339	-	TRUE	rpoC	TRUE	4183373	4187596	+	-4.87648724432322	3.62381492659686e-05	0.77709002410391
GCCCAGCGCGCGGATGATGT	22878	-	TRUE	ileS	TRUE	22391	25207	+	-4.87343655902274	4.72961055229167e-07	0.777198404746672
TCCATTTCGATGCCGGAGAT	2733168	+	TRUE	rluD	FALSE	2733053	2734033	-	-4.87267355661533	2.68041201974061e-16	0.777225516395932
GCTGATAAGCCTGCTCAAAC	976967	-	TRUE	mukB	TRUE	975549	980009	+	-4.86949964836315	1.48973790357034e-27	0.777338314700418
GGGGTGGTGATCCTGCGATC	598816	+	FALSE	cusA	FALSE	597937	601080	+	-4.86813720000546	4.88322929033347e-31	0.77738674513144
AACCGGTACGGGGGCACGCC	967710	-	TRUE	lpxK	TRUE	967589	968575	+	-4.86748838826342	8.99674358108153e-44	0.777409810315671
GGGCGCTGGCGTCGGGACGC	4191434	-	FALSE	thiF	FALSE	4190844	4191599	-	-4.86489516329008	4.09642408204935e-46	0.777502012840292
GATCCATAATCACTCCTTAG	4196797	-	TRUE	hemE	FALSE	4195739	4196803	+	-4.8607868542259	9.00176692962307e-11	0.777648129198686
CATATGGCAGCCGAGATCTT	2869452	+	TRUE	ispF	TRUE	2869323	2869802	-	-4.85997862738592	3.88817415965698e-20	0.777676881106489
TTCAAGGCTGCGGGAATATA	3235421	-	TRUE	ygjR	FALSE	3235315	3236319	+	-4.85967250623871	2.87746073942002e-08	0.77768777163282
CATTTCTGCGTCGTTACGGG	4390329	-	NA	NA	NA	NA	NA	NA	-4.85438179176996	8.23406260422658e-55	0.777876041609283
CATCAGCGTCGTCATCAGAT	2283872	-	TRUE	yejM	TRUE	2282398	2284158	+	-4.85233996972603	2.37912524274988e-28	0.777948724189336
AGGTTCTACCGGTTTCATTC	4617844	+	FALSE	deoB	FALSE	4617626	4618849	+	-4.85159567231745	1.29501623990761e-13	0.777975222264264
AGCACAACTTCAAAGCGATG	97987	-	TRUE	murD	TRUE	97087	98403	+	-4.84900567294493	8.87187550838225e-57	0.778067444096583
AGTGATAATCATAAGATATC	4484261	+	FALSE	lptF	TRUE	4484241	4485341	+	-4.84585331515154	8.04681345029634e-11	0.778179719270081
AGCTGGCTAATACGGCAAAT	1146502	-	TRUE	yceD	FALSE	1146017	1146538	+	-4.84422984083417	1.92546883663837e-09	0.778237553984225
GGCTGCTGGACCGGTTGACG	2528954	+	TRUE	zipA	TRUE	2528269	2529255	-	-4.84202970795244	3.25614403195644e-44	0.778315945326752
TACGAGACGGTACGCCCAGC	4182564	-	TRUE	rpoB	TRUE	4179268	4183296	+	-4.84115242657893	4.10736309077286e-30	0.778347207508719
TGGCTTGGTGTCGCCGGGCT	4289309	+	FALSE	nrfD	FALSE	4288499	4289455	+	-4.84107319361268	1.03965128674886e-142	0.778350031122627
GCGGCAGTGCCTGCTCGAAC	42672	-	TRUE	fixA	FALSE	42403	43173	+	-4.84029117647182	4.02010253758544e-32	0.778377900854812
AGAAGTACGGCGCATCTTCC	977630	-	TRUE	mukB	TRUE	975549	980009	+	-4.83045004871025	4.01425282736805e-58	0.778728792217656
GACAATGCGGTTTTTGCCTG	667750	+	TRUE	rlmH	FALSE	667471	667938	-	-4.81966816016858	2.85107526110017e-17	0.77911359032642
ATGCCATAAACCAACGTCAG	4486322	-	TRUE	lptG	TRUE	4485341	4486423	+	-4.81622424449918	2.82662619568268e-18	0.779236581430283
GGATCTGTACGCCAGAGGTC	1796462	+	TRUE	pheS	TRUE	1795983	1796966	-	-4.81516182663961	6.32104799264485e-23	0.779274530947574
CCAGGAGTAGAGCGCCTGGA	434398	-	TRUE	nusB	FALSE	434361	434780	+	-4.8148088336477	2.89059751774624e-05	0.779287140659183
GATTAGCGACCAGGGAAGCC	2744475	+	TRUE	ffh	TRUE	2744456	2745817	-	-4.81278313828413	2.09390837271971e-19	0.779359510990732
TACGCTGCCGGGCTTTGATC	4217617	+	FALSE	aceK	FALSE	4216619	4218355	+	-4.80869708688983	2.93714908201847e-24	0.779505530856286
GAAGGGCACTGGCGCGGCAC	4123422	+	TRUE	priA	FALSE	4122635	4124833	-	-4.8058871045765	1.03362243504502e-29	0.779605980645114
TGCAGGCGAAGCTGCCGGGC	1700868	+	FALSE	add	FALSE	1700257	1701258	+	-4.80459227690361	6.68611735762913e-32	0.779652276186203
ACGCTGCACGTCAGTCAACA	3429213	+	TRUE	tsaC	TRUE	3428865	3429437	-	-4.80347682278479	3.78562879845962e-31	0.7796921627763
AATTTGCAGGTGGAATGATG	2992920	-	FALSE	ygeK	FALSE	2992482	2992925	-	-4.80173645135529	8.9983272893557e-05	0.779754403413275
TTATATTCCGGGTATTTGCC	2394048	+	TRUE	nuoI	FALSE	2393930	2394472	-	-4.80067770193405	2.06725922121077e-09	0.779792272168302
GAAGTTGCTGCCGGAGCCAT	4100556	-	TRUE	kdgT	FALSE	4099713	4100696	+	-4.79919720008716	7.6952178684948e-23	0.779845232095613
GGCCACCAGTGAACCCGCAC	206216	-	TRUE	dnaE	TRUE	205126	208608	+	-4.79804789729855	6.88757810918116e-25	0.779886349460991
GCCAGCTTTTGAATCTCGGC	988125	+	TRUE	asnS	TRUE	986808	988208	-	-4.79569427590286	2.17164055499067e-13	0.779970565966098
GATAAGATGAACCATCTACA	4045018	-	TRUE	polA	TRUE	4044989	4047775	+	-4.79254162141696	6.33147554382489e-05	0.780083401712675
CAACTCGACAGCCGGGTGGA	2913757	+	FALSE	barA	FALSE	2913079	2915835	+	-4.79207438287472	1.136090179e-11	0.780100127290288
GACGCCGGGGACAATCAGGC	4331095	+	TRUE	basS	FALSE	4330204	4331295	-	-4.78991777009522	9.52163686526182e-13	0.780177336113266
GCCCAGAGAGTGACCGGTCA	2438641	+	TRUE	fabB	TRUE	2438407	2439627	-	-4.78925136730326	2.60175558843847e-19	0.780201197068663
ACCCACCGGCAACTGCAAAT	56468	+	TRUE	lptD	TRUE	54755	57109	-	-4.78902729101063	5.2469630712807e-22	0.780209220583867
AAGATACGGTGGCGATGTGT	4195683	+	FALSE	nudC	FALSE	4194926	4195699	+	-4.78791712821691	1.00041843442087e-32	0.780248974693583
CCTCATTCGCCAGCCGTTCC	975159	-	TRUE	mukE	TRUE	974872	975549	+	-4.78681860049121	4.05937538923705e-85	0.780288316148036
GCTTCTTGTACAGACCTGCG	45591	-	TRUE	fixX	FALSE	45463	45750	+	-4.78438342926965	5.66133940050304e-68	0.780375540817863
GCGGGAGCCGGGGGGCGTAT	28425	+	FALSE	dapB	FALSE	28374	29195	+	-4.78276555720789	1.05527315331336e-11	0.78043350167604
CGCCTGCTCGGCAATAAACG	2699662	+	TRUE	pdxJ	FALSE	2699020	2699751	-	-4.78006375203193	4.58210300314475e-15	0.780530314031519
CCGCTGCCAGCGTTGCCGCC	3193968	+	TRUE	rfaE	FALSE	3193342	3194775	-	-4.77572882529244	2.25500905566862e-32	0.780685695362561
TGTCACGCAGAACGCGGATC	3311558	+	TRUE	infB	TRUE	3311364	3314036	-	-4.77416595721977	1.53122852516059e-54	0.780741730057551
GAGTGAGACGTGTAGCGCAT	1191756	+	TRUE	hflD	FALSE	1191213	1191854	-	-4.77125634780556	1.14073970904624e-31	0.780846071922419
TTCACAAAGCCTGCAAACAG	2906109	+	TRUE	pyrG	TRUE	2906051	2907688	-	-4.77111309133162	3.45992462030473e-12	0.780851209981024
GCCTGACCTTGGGTGAATAC	661368	+	TRUE	lipB	FALSE	660860	661501	-	-4.76924424640983	1.54767945689774e-12	0.780918244454151
TGTTGGGGAAGCCGCACCGG	2588112	+	FALSE	acrD	FALSE	2585617	2588730	+	-4.76668369176828	2.04689735443052e-07	0.781010108877038
CATAAAGGCGAAACCGGCAC	3021714	+	FALSE	xdhD	FALSE	3019338	3022208	+	-4.76296512573204	1.9288586002168e-07	0.781143557497116
CGGCCGAGAATGGTAATTTG	3882606	-	TRUE	rnpA	TRUE	3882516	3882875	+	-4.76257682889941	1.1456801818453e-29	0.781157494981247
TTTCGCACAGGCGATATCAG	1959029	-	TRUE	argS	TRUE	1958086	1959819	+	-4.76216259889054	1.98766668299333e-11	0.781172363856278
AGCAGACCAATGCCACCCTG	3912859	+	TRUE	glmU	TRUE	3911853	3913223	-	-4.76175541475689	1.17413498428227e-56	0.781186980369796
AGCGGCGGTGGCTGATTGCC	3970215	+	FALSE	wecC	FALSE	3969283	3970545	+	-4.76094040569461	1.28095524481826e-36	0.781216238042326
ATTTCACCTGACTATACAAT	3208484	+	TRUE	tsaD	TRUE	3207552	3208565	-	-4.76019053077135	8.79098000137754e-16	0.781243159427308
CCAGTTTTTGCTGTGCACCG	493010	-	TRUE	dnaX	TRUE	491316	493247	+	-4.7588757078358	1.22324207137023e-22	0.781290367584478
TGGCACTTCTACTCCGTAAT	2337566	-	NA	NA	NA	NA	NA	NA	-4.75817133687586	4.09314691939366e-82	0.781315660070583
GGCGGTGAGGTTTTCGTTAC	3051618	+	TRUE	pepP	FALSE	3051537	3052862	-	-4.7530903313428	6.70009467702336e-17	0.781498156862138
AACTCAGAGATATCGCCACG	3307560	+	TRUE	pnp	FALSE	3307055	3309190	-	-4.75286317324226	1.53315502701547e-16	0.781506317794126
GCGGGCGATCACGTCACCGA	673836	+	TRUE	leuS	TRUE	671424	674006	-	-4.75238992498543	1.25503210161709e-39	0.781523320362757
TTAAGGATCTTACCTTTCAG	3172103	+	TRUE	parE	TRUE	3171526	3173418	-	-4.75204858736319	8.70611888959796e-15	0.78153558418751
ATAACCTTCGTCCTGATACC	3720819	+	TRUE	glyS	TRUE	3720351	3722420	-	-4.74648385385353	2.65273748451762e-17	0.78173557225379
CTTCAACCGCCGGTTTCGCC	4480696	+	TRUE	valS	TRUE	4479005	4481860	-	-4.74593637351768	3.40193589170636e-49	0.78175525339542
TCGCCTCTTTCGGGTTATCC	2219831	+	TRUE	bglX	FALSE	2217714	2220011	-	-4.74347139173236	1.1332767949184e-79	0.781843878271618
ATCGTTCAGGCGACGGGTGT	106605	+	FALSE	lpxC	TRUE	106557	107474	+	-4.74339701358265	3.58096816089955e-70	0.781846552743366
CACAACGACCTGGAAAACGT	2819789	-	FALSE	alaS	TRUE	2817403	2820033	-	-4.74254225520704	1.38001898170408e-09	0.781877289254376
ATAGCTGGCAGGCGTCTCAT	3380340	-	TRUE	degS	TRUE	3380222	3381289	+	-4.73973534740371	2.1965526559737e-06	0.781978240688668
GGTCCGCTTTACCGCGACCC	56674	+	TRUE	lptD	TRUE	54755	57109	-	-4.73870894962727	2.67256378465953e-58	0.782015161957973
TATTTCCTCGCCGGGGGGAC	4561805	+	NA	NA	NA	NA	NA	NA	-4.73787077864779	1.6335457020737e-11	0.782045314976221
TGATTTTGCCCGGTTGCGCC	1192354	+	TRUE	mnmA	FALSE	1191890	1192996	-	-4.73776160715969	1.14314794192974e-71	0.782049242567863
ATTCGGATCGTTCAACAAGG	666520	+	TRUE	mrdA	TRUE	665539	667440	-	-4.73614403015417	0.000280049097367709	0.782107441707057
AAAGCGTTCCACTGTTCTTG	3526297	-	TRUE	yrfF	TRUE	3524491	3526626	+	-4.72858170779742	3.26478283855469e-69	0.78237964302564
CATGTGGTTCACCCGCACGT	432807	-	TRUE	ribD	TRUE	432679	433782	+	-4.72833648407874	1.00286688430401e-141	0.782388472879947
CCGGCAGTTTTGCCAGCCAG	93906	-	TRUE	murE	TRUE	93166	94653	+	-4.71949098614507	2.35158098215378e-19	0.782707109059064
TTAAATTCTCAAAGTCGCCC	101373	-	TRUE	murC	TRUE	100765	102240	+	-4.71705401048606	3.72481165195597e-06	0.782794940409116
TAAATTTGGCGCTGGCATTC	3163836	+	TRUE	parC	TRUE	3161737	3163995	-	-4.71363519124799	7.16309449464511e-19	0.782918191738439
CCTGGCCCATCAAGGTTGAC	832051	-	FALSE	ybiA	FALSE	831691	832173	-	-4.71340277880678	9.67272204082645e-17	0.782926571812721
CGTTCAGGGGAAGCCCGCAT	2938050	+	FALSE	fucR	FALSE	2937390	2938121	+	-4.71298330354168	2.63013540806418e-15	0.78294169724835
CATCGGCAATACGAAAACCG	3200353	-	TRUE	cca	TRUE	3199913	3201151	+	-4.71108862964859	3.50045794680313e-11	0.783010022665785
GTTAATACCCGTCGTCATCG	195730	+	FALSE	cdsA	TRUE	195677	196534	+	-4.70405320998629	1.92051207063677e-67	0.783263837197842
ACGCCTGAATGAGTAGCGCA	1155056	-	TRUE	holB	TRUE	1154985	1155989	+	-4.70232319778393	2.86800583485866e-12	0.783326275489985
TTCGCTTAGGCATAAACTGC	2699807	+	TRUE	recO	FALSE	2699763	2700491	-	-4.69914502371781	5.91315742375378e-11	0.783441005690247
GGGTAATATACGGTTCCTGA	973467	-	TRUE	smtA	FALSE	972760	973545	+	-4.69819613471654	1.06858960766727e-05	0.783475266536118
GCTCGGTGTCGTTACGACCG	772378	-	TRUE	cydB	FALSE	772265	773404	+	-4.69652490074032	2.31069003780207e-109	0.783535615854313
TTTGCGTAGCGCCTGCAACG	4124345	+	TRUE	priA	FALSE	4122635	4124833	-	-4.69466354329695	1.00940985721047e-169	0.783602841596155
CGCTCACCACGCCTGCCAGC	772771	-	TRUE	cydB	FALSE	772265	773404	+	-4.69169987370587	8.41295385945727e-109	0.783709902818957
GGCTGTTCAGATCCACCGCC	4124461	+	TRUE	priA	FALSE	4122635	4124833	-	-4.68984144570834	7.09056427695422e-50	0.783777052614818
GGTCGCCGGTTACCAGCGAA	4389322	+	TRUE	rsgA	FALSE	4388480	4389532	-	-4.68772551463179	3.45435840795547e-12	0.783853520671442
TCGATCGGGTTAACTTTATG	1190314	+	TRUE	purB	TRUE	1189839	1191209	-	-4.68722427055115	1.65737820277393e-38	0.783871637417616
GCACTGATGTTAGCCGCACT	4262676	-	TRUE	dnaB	TRUE	4262337	4263752	+	-4.68597498166807	1.15313002080331e-69	0.783916794811887
CCGGCACGCCCAACCCGAGA	4484390	-	TRUE	lptF	TRUE	4484241	4485341	+	-4.68498533522167	7.44221617909004e-27	0.783952570739713
GCTCGCCACTATTGCCCTCC	3396910	+	TRUE	mreC	TRUE	3396897	3398000	-	-4.68465691358583	1.26207681980769e-111	0.783964443972789
AGCGTACCGCGGTTGATCGA	4252328	+	TRUE	plsB	TRUE	4252066	4254489	-	-4.68356109989263	1.02090260321777e-09	0.78400406287896
TTAATGTCGTCAGACGTTTC	158040	+	TRUE	pcnB	FALSE	157729	159126	-	-4.68343676748587	7.20470859190099e-07	0.784008558343083
CCGTTTCCATAATGGCCAGC	770773	-	TRUE	cydA	TRUE	770681	772249	+	-4.68337363810294	5.2086177689981e-142	0.784010840920385
TCTTTCAGGTAGTTAACAAC	3070418	+	TRUE	pgk	TRUE	3069481	3070644	-	-4.68309556517451	6.6379476915359e-07	0.784020895397607
TTTGCCTGGCAGCCACAAAC	4125847	-	FALSE	yiiX	FALSE	4125309	4125917	-	-4.68230829260232	6.93125851219694e-15	0.78404936276089
ATTATCGAAGCGGGTCAGGC	466078	+	TRUE	ybaE	FALSE	464836	466536	-	-4.68188332940975	6.33138501480917e-09	0.784064730066177
CCAGACGGTTCGGGAAGTTA	133984	-	TRUE	acnB	FALSE	131615	134212	+	-4.6808708126081	3.38072016848636e-10	0.784101346617221
GGACCAGAAGGCGGCAGTGG	4269160	-	FALSE	uvrA	FALSE	4269072	4271894	-	-4.68012574447876	1.01129471020977e-16	0.784128293366996
CCACCAATGTAGATATCCAC	672439	+	TRUE	leuS	TRUE	671424	674006	-	-4.67855145705413	2.52292044434445e-28	0.784185236438768
TTCGATCAGCATTTCCGGCT	3314949	+	TRUE	nusA	TRUE	3314061	3315548	-	-4.67518528539834	4.60115701667063e-44	0.784307020962454
TGGCCACCAGAAACGGTTAA	1452498	-	TRUE	paaA	FALSE	1451951	1452880	+	-4.67372620686732	1.11855104577481e-06	0.784359820629899
TACCGTGGGTGGCTTCAAAC	1195344	-	TRUE	icd	FALSE	1194346	1195596	+	-4.67043302040415	2.20722945444106e-21	0.784479017285597
GACCTACCGCTTCAACGTAG	243848	-	TRUE	lpcA	FALSE	243543	244121	+	-4.67038536074055	1.95727628203375e-31	0.78448074258976
ACCAGCAACTTCAACCTTGC	987927	+	TRUE	asnS	TRUE	986808	988208	-	-4.66703438858392	8.8623082250657e-17	0.784602068521065
CTGCTCCACCATGCCGCCCA	3905521	+	TRUE	phoU	FALSE	3904876	3905601	-	-4.66508270657034	3.26650466109625e-81	0.784672748784127
AGAAAAGAGAGTCGGTCTAC	973614	-	TRUE	mukF	TRUE	973542	974864	+	-4.66234114019302	0.000170526865280104	0.784772056260237
CACGGCAAGCTGCATTTTCC	3452719	+	TRUE	gspA	FALSE	3451951	3453420	-	-4.66191959972335	1.30166653712994e-125	0.784787327906854
ACCAGCGACATATTCAAAGT	434133	-	TRUE	ribE	TRUE	433871	434341	+	-4.657056675781	1.35440016510881e-10	0.784963545808652
TTACAAAATGCCGACCATGC	3000418	+	FALSE	xdhA	FALSE	2998367	3000625	+	-4.65527866611705	6.39635635962276e-23	0.785027995349654
CCGAACAGGTTGCACAGCAC	4023191	-	TRUE	ubiD	TRUE	4023011	4024504	+	-4.65255503766687	3.39369424229232e-20	0.785126742337185
CCGCTGAAAGGATATCCAAC	3510925	+	TRUE	trpS	TRUE	3510656	3511660	-	-4.65202797589908	3.86979055532567e-06	0.785145854186164
TATGGCCGTGGCCGTATCAT	952239	-	FALSE	pflB	FALSE	950495	952777	-	-4.64959206298715	1.52900012548508e-36	0.785234195200553
CTGGGGCGCGCCGATTCCGA	672704	-	FALSE	leuS	TRUE	671424	674006	-	-4.64715921784293	8.54488412834829e-47	0.785322444803175
AGTTAATACCGCTGCCAAAG	689906	+	TRUE	lnt	TRUE	688566	690104	-	-4.6467320562851	0.000244608752745478	0.785337941810208
ATTTGGAGATGTGAGCGATC	1861766	-	TRUE	gapA	FALSE	1860795	1861790	+	-4.64598815596854	3.65765871143431e-12	0.785364931252284
CGATACTGCTGAGTTTGGCG	4458994	-	FALSE	nrdD	FALSE	4458545	4460683	-	-4.64208344546651	5.91929356291899e-82	0.785506628455454
GCCAGTTTTTCTGGCATATC	3975873	+	FALSE	wecF	FALSE	3975548	3976627	+	-4.63874573933061	4.66214109318625e-11	0.785627790297512
CACCACGTTGGCGTCTTCAA	2634536	+	TRUE	der	TRUE	2633906	2635378	-	-4.63838507514917	7.36135780877133e-82	0.785640884981007
CGAAGGCCCGCTGGGCGGCG	2692443	-	FALSE	purL	FALSE	2689678	2693565	-	-4.63618544228899	2.77291449735787e-09	0.785720756800904
GAGTTCTTCCAGTACGCGCT	3793946	-	TRUE	waaF	FALSE	3792952	3793998	+	-4.63611585984164	2.06068971760776e-46	0.785723283704233
TTTTCACGCGCTTGAGCGAC	1794492	+	TRUE	pheT	TRUE	1793581	1795968	-	-4.63549001671366	2.63355150539124e-29	0.785746012078641
CCACGGTTCATAATGAAGTC	132995	-	TRUE	acnB	FALSE	131615	134212	+	-4.63349754437283	1.41038835575772e-14	0.785818380274896
CTCTTTACGGTTGCCGCGCG	3821033	-	TRUE	spoT	TRUE	3820423	3822531	+	-4.63278472375565	1.58389093652277e-29	0.785844273730129
ACCTTCCAGCAGGGCGTTGA	3880994	+	TRUE	dnaA	TRUE	3880349	3881752	-	-4.63273986816165	7.16793497799254e-21	0.78584590318215
CGCTTCAGGTGTGGGGGCAT	497325	-	TRUE	hemH	TRUE	497279	498241	+	-4.62643889880755	1.49314110791543e-17	0.786074863251636
AGCCACTTCAATTCCGGTAT	4048720	+	TRUE	yihA	TRUE	4048156	4048752	-	-4.62481260201594	4.10187960488837e-15	0.78613398011205
GCTCATGTTTGGTGCCATAT	3325318	+	TRUE	rlmE	FALSE	3325057	3325686	-	-4.62451106608855	2.66635769865821e-112	0.786144942100417
ATTACGCCAACGGAACGTAC	2629200	+	TRUE	guaA	FALSE	2628980	2630557	-	-4.62383718260501	4.80333979925198e-28	0.786169441456737
AGCGCCTGGAACAGCATATC	3302052	-	TRUE	yhbW	FALSE	3301470	3302477	+	-4.62298207813855	2.35905410740259e-58	0.78620053138681
CCAGACCTTCCAGCGGGGTC	2412184	-	TRUE	ackA	FALSE	2411492	2412694	+	-4.62214709807	1.96888414412608e-32	0.786230892005976
TACAGCCCCATCGGGTTATC	854441	+	TRUE	ldtB	FALSE	854047	854967	-	-4.6113772950692	6.95084583248543e-23	0.786622701917229
GAGTCAAAAAGGCGCTCGGT	3906514	+	NA	NA	NA	NA	NA	NA	-4.60990062843043	2.9474900875902e-12	0.786676454108005
AGCCACACGATGGCGTTACC	4262953	+	FALSE	dnaB	TRUE	4262337	4263752	+	-4.60856373816874	3.59640883775864e-53	0.786725124630643
AGTGACCGGACTCCATATCC	1302082	-	TRUE	oppC	FALSE	1301858	1302766	+	-4.60667179214332	1.57612679442595e-16	0.78679401267999
CGGTCATGCGTGAAGTCGCG	2743249	+	TRUE	trmD	TRUE	2742594	2743361	-	-4.606543750357	1.91150017432127e-36	0.786798675272583
GATAAAGGTCACAAGAACGG	4121240	+	TRUE	ftsN	TRUE	4120403	4121362	-	-4.60553595681917	4.87672848923924e-16	0.786835375617444
TACGCTTCCCGTGAAGCCCT	3722458	-	FALSE	glyQ	TRUE	3722430	3723341	-	-4.60374523046682	4.66740554133135e-12	0.786900596107088
AGTCACTTCGCACGCCAGCT	4195896	-	TRUE	hemE	FALSE	4195739	4196803	+	-4.60237898482372	2.14831937699003e-73	0.786950363751278
GTCAGGATATCCTGCACCAT	1889173	+	TRUE	tsaB	TRUE	1888596	1889291	-	-4.60153440789857	4.93302083819946e-48	0.786981131941441
GACCGGATGCTCTATTTATA	3341194	+	FALSE	lptC	TRUE	3340858	3341433	+	-4.59645683774381	1.24789291119416e-05	0.787166160066097
ACTCACGCATCGCGTCCAAC	3172560	+	TRUE	parE	TRUE	3171526	3173418	-	-4.59478062032333	2.91913409796007e-21	0.787227261016994
CTGATCGGCATTGCCCAGAA	1294637	+	NA	NA	NA	NA	NA	NA	-4.59451137871132	0.000304876265324525	0.787237076211839
AACCGTGTTTAGCCCCGCTT	4587131	-	NA	NA	NA	NA	NA	NA	-4.5939137461183	3.0724823573699e-37	0.787258863764606
CAGTACGACGTTGGTTTCAC	188943	+	TRUE	map	TRUE	188712	189506	-	-4.59221021428169	1.46862663144778e-91	0.78732097507812
TGTAATGACGCCCCAGGGCT	1337499	-	TRUE	pgpB	FALSE	1337354	1338118	+	-4.59037136629245	6.99523991672115e-18	0.787388031061889
ATAACGCGGATGAAGCAGTG	1115779	+	TRUE	lpxL	FALSE	1114885	1115805	-	-4.58692600730755	6.10879713055828e-18	0.787513701313712
TTATGCGCGTAACTATGGCG	25374	+	FALSE	lspA	TRUE	25207	25701	+	-4.58231255145998	3.15819425867894e-92	0.787682040998428
CGCCTTCGGTAGGACGACCC	3070467	+	TRUE	pgk	TRUE	3069481	3070644	-	-4.57674038649753	1.06738782850254e-19	0.787885458854499
TCACTTTCGCGAACTCGATC	3442252	+	TRUE	rplO	TRUE	3442127	3442561	-	-4.57529408031835	1.10362890036349e-14	0.787938274987775
AGAGAGCACATCCAGTAGCA	979399	-	TRUE	mukB	TRUE	975549	980009	+	-4.57368332494659	1.94287221066236e-18	0.787997104803247
CACGGTGAAACCGGACTGGA	2252943	-	FALSE	rihB	FALSE	2252267	2253208	-	-4.57098488365184	0.000267807459231281	0.788095679992985
CACCAGGCAGATGGCATCGT	4393906	-	TRUE	tsaE	TRUE	4393608	4394069	+	-4.56925552520099	1.69727623008875e-80	0.788158867149477
CGCAAAAGGTAAATACCCGC	1754687	+	FALSE	pykF	FALSE	1753722	1755134	+	-4.56404304719533	8.03656741390896e-14	0.788349381551205
TGGGAGTAGTGTCGCCGGAG	2774740	-	TRUE	yfjY	FALSE	2774408	2774890	+	-4.56306095423952	3.16231553913927e-16	0.788385287046069
GTTCTGGCTATCCGGGAACC	777843	-	TRUE	tolB	FALSE	776963	778255	+	-4.56047119693397	2.19006149425911e-12	0.788479984723966
TGCGCGAAAACGTTCCTGGT	1264323	-	TRUE	prfA	TRUE	1264235	1265317	+	-4.55932392468988	2.59353747886359e-76	0.788521943423814
GCTTGGGTTGGCATATGCAG	3194039	+	TRUE	rfaE	FALSE	3193342	3194775	-	-4.55510675233168	6.26225798974946e-24	0.788676214659019
TTGCGCGCGCAGCAACCCAG	670384	+	TRUE	holA	TRUE	669797	670828	-	-4.55186403540807	3.09020142176563e-19	0.78879487974081
TCGGCAGCGGACGCGGTTCG	2962514	+	TRUE	thyA	FALSE	2962383	2963177	-	-4.54914121938596	3.00009446295905e-54	0.788894546976495
ATGACGGATTACCGTGCGAA	107958	-	TRUE	secM	TRUE	107705	108217	+	-4.54830196066147	4.20583459801406e-27	0.788925272675089
TTCGACGAGAATACCCGGTG	2264745	-	TRUE	yeiQ	FALSE	2264267	2265733	+	-4.54786715626922	7.43103382559545e-28	0.78894119203134
AGCTATTAGCATGGTGGTGT	1734414	-	FALSE	ydhP	FALSE	1734145	1735314	-	-4.54745431267897	5.28198292129793e-47	0.788956307938281
CTCGGCTGTGCTAATCAGGC	1459097	+	FALSE	paaJ	FALSE	1458917	1460122	+	-4.54442293592602	8.64451290125167e-23	0.789067316890254
ACCGCGAATCGGCATTGTTA	97733	-	TRUE	murD	TRUE	97087	98403	+	-4.53856063941154	1.77492801641489e-54	0.789282082707661
TCCAGCGCTCCGTGACCGAG	3793123	-	TRUE	waaF	FALSE	3792952	3793998	+	-4.53729922249999	2.20212477850682e-64	0.78932831012721
GAACCATTCGGCATCCGCCC	132060	-	TRUE	acnB	FALSE	131615	134212	+	-4.53299697978732	1.2442500264399e-12	0.789486016087664
ATTTCAACCACTTCTTCGGT	4175898	-	TRUE	nusG	TRUE	4175766	4176311	+	-4.53196063533713	7.27512520172219e-14	0.789524014459718
GTGCTTACGATCAAATGGGG	493235	-	TRUE	dnaX	TRUE	491316	493247	+	-4.53109786527347	2.41859019845721e-08	0.78955565138267
GGGCAATATCTCGACCAGAG	2632114	+	NA	NA	NA	NA	NA	NA	-4.52975308391423	2.11020392577445e-11	0.789604968238182
CGATACGCTTGTGACCAGAC	4180245	-	TRUE	rpoB	TRUE	4179268	4183296	+	-4.52819372065001	1.23856741552925e-30	0.789662162120618
CCGGACCGATCAGTTCGGAC	3915853	+	TRUE	atpG	FALSE	3915425	3916288	-	-4.52661244187295	4.70563797506074e-12	0.789720168275622
GACCGCAAAAGCTCGCTGAT	1147766	-	TRUE	plsX	FALSE	1146844	1147914	+	-4.52658267940121	1.49381501966305e-12	0.789721260136069
CCACCACGAAATCCATAGCC	3882755	-	TRUE	rnpA	TRUE	3882516	3882875	+	-4.52505825429996	2.76985918497023e-16	0.789777188946933
CAACCTCGGTTCCATTCAGT	179045	+	TRUE	mtn	FALSE	178455	179153	-	-4.52235206020406	4.13122653431951e-38	0.789876494559992
TATCCATTTCATGCACGGGC	2241599	+	TRUE	folE	FALSE	2241006	2241674	-	-4.51961884211817	4.15708183011662e-16	0.789976817188213
AAAAGGCCAGACGCTCTTCC	206022	-	TRUE	dnaE	TRUE	205126	208608	+	-4.51736001438227	4.73871042429987e-18	0.790059746578444
TAATGGCCTGCTCTATCGCT	1418241	+	TRUE	racR	TRUE	1417789	1418265	-	-4.51506058838047	0.000324900628563404	0.790144184357124
TTCAAGTTCACCGCTTTCTT	2661660	-	TRUE	suhB	TRUE	2661464	2662267	+	-4.51449006528675	1.09646952239153e-28	0.790165137468408
CTGAAGCTGACAGGCGCACG	4270036	-	FALSE	uvrA	FALSE	4269072	4271894	-	-4.51345428433723	3.87445055083613e-41	0.790203180545338
CTTGCAAAGGTTTCGTCGTC	2616758	+	TRUE	hda	FALSE	2616097	2616798	-	-4.51279143238031	1.66523518677688e-45	0.790227528279393
ACGCTTACGTTTACGCATCT	2633957	+	TRUE	der	TRUE	2633906	2635378	-	-4.51156201786913	4.12300481509647e-141	0.790272690838467
GTCTGAAACTGGCTCTCTTC	691509	+	TRUE	ybeY	FALSE	691097	691564	-	-4.51120599594955	1.34652388226969e-84	0.790285770272528
GCGCTACCGGAGGCAATTTC	2222786	+	TRUE	pbpG	FALSE	2221960	2222892	-	-4.50909199732429	6.89695982984415e-20	0.790363442683437
CTTCCTGCGTCACTGTGAAA	373982	+	FALSE	mhpE	FALSE	373092	374105	+	-4.50546286018864	1.46860217435742e-22	0.790496819832265
CGTAATTGGCCCACGGGAAC	3980112	-	TRUE	yifK	FALSE	3978910	3980295	+	-4.50420454143536	7.22219558500198e-05	0.790543075761931
GTACCAGGCCAACGCGGAAC	4180653	-	TRUE	rpoB	TRUE	4179268	4183296	+	-4.504155569204	1.29951312643643e-20	0.790544876095745
GATTTCTGCCAGCTGTTCAG	2414453	-	TRUE	pta	FALSE	2412769	2414913	+	-4.49925482679889	3.23303091995091e-17	0.790725080332061
CGTTTTCGAAGAATGAACGC	1796033	+	TRUE	pheS	TRUE	1795983	1796966	-	-4.49511440304704	2.90385264331888e-10	0.790877391077768
GCACACGGAAGCCATAGAAG	3307880	+	TRUE	pnp	FALSE	3307055	3309190	-	-4.49426385933633	6.70912607157497e-14	0.790908686673436
CAGGAATTCTTCTTCGCCCG	131727	-	TRUE	acnB	FALSE	131615	134212	+	-4.49243138172005	9.07021054404965e-24	0.790976120759376
TTAGATACCGGCAAAATTCC	4131263	-	TRUE	metF	FALSE	4130639	4131529	+	-4.49204458687375	3.1135308600237e-12	0.790990356049361
ACCGCTGCCTGGCCATTCAG	3292211	-	TRUE	lpoA	FALSE	3291422	3293458	+	-4.4899794305166	1.76200789861301e-78	0.791066369093836
GTGGGAGGCAGAAATGGGTG	475778	-	TRUE	ffs	FALSE	475672	475785	+	-4.48791391838333	2.62569133303737e-17	0.791142409848178
TTCCGGTGCCATCCCCAATG	497937	-	TRUE	hemH	TRUE	497279	498241	+	-4.48664535536761	6.07157483207716e-45	0.791189118582124
CGGCTCCCGCGATGGCAACG	28391	-	TRUE	dapB	FALSE	28374	29195	+	-4.48241588950444	1.12759704569669e-64	0.791344888183903
GATTCGTCTGGTGGCCGGGC	3295617	-	FALSE	yraQ	FALSE	3295120	3296160	-	-4.48054969191427	3.92914791929578e-27	0.791413639028016
AACCAGGATGGCATTGGAAA	713145	-	TRUE	pgm	FALSE	712781	714421	+	-4.47880411747517	2.00946258598335e-05	0.791477956920739
ATTGCGTCCATGGTTGGTAT	3804917	+	TRUE	waaG	FALSE	3803966	3805090	-	-4.47634844358217	2.17646798117469e-67	0.791568457024181
CATGGCCTGGCTGGCAACTC	2660853	-	FALSE	trmJ	FALSE	2660605	2661345	-	-4.47622351534141	1.38759262238631e-99	0.791573061616543
GGGACTGAACCAGGGGACAG	2931629	-	FALSE	fucA	FALSE	2931063	2931710	-	-4.47516808444449	3.85973217885844e-06	0.791611964719099
GGAACGGTCGTTCTGGCACT	3033488	+	TRUE	prfB	TRUE	3033206	3034304	-	-4.46877553376844	4.43099045392253e-50	0.791847675395392
GTGAAACCGGGTCTGGTGGT	2544083	+	FALSE	murQ	FALSE	2543795	2544691	+	-4.46873750276766	1.42022869926575e-28	0.791849078121544
GAAGGTTACCACCAACGTGC	432817	+	FALSE	ribD	TRUE	432679	433782	+	-4.46774787779023	4.1378058553972e-44	0.791885580955029
TTTTGCCCGGGTGCGGAGTT	3793525	+	FALSE	waaF	FALSE	3792952	3793998	+	-4.46761954439735	6.59230572369499e-37	0.791890314845676
CGCGGTATCGCCACCGGTTT	1847657	-	TRUE	sppA	FALSE	1846861	1848717	+	-4.46753074143114	3.73746894216203e-48	0.791893590593116
AGCACGTAATCCCGCGCCAC	4380303	+	TRUE	frdA	FALSE	4378533	4380341	-	-4.4623448424596	1.03131231888259e-145	0.792084934092029
CCTGGCTGACTTTGTCGTAC	2629240	+	TRUE	guaA	FALSE	2628980	2630557	-	-4.46213468757276	4.00331146821177e-26	0.79209269010149
ACGATGCCATTCAGTTTGCA	2819698	-	FALSE	alaS	TRUE	2817403	2820033	-	-4.4543269415985	9.75905323265833e-37	0.792380951696888
CGGCGCTTTTTTCGGAAATC	4125251	-	NA	NA	NA	NA	NA	NA	-4.45406193707428	2.07755152443327e-08	0.792390739332335
AACATCAGGCTTTTCTTGAC	416087	-	FALSE	sbcD	FALSE	414974	416176	-	-4.45293179958468	2.55433170391266e-13	0.79243248236724
TTGCGGGTTAACAGAAACCA	3308843	+	TRUE	pnp	FALSE	3307055	3309190	-	-4.44984694115499	0.000135245883677006	0.792546447843539
AGGACACGGATCACCGAGAT	59420	+	NA	NA	NA	NA	NA	NA	-4.44743422982621	5.76211466341268e-53	0.792635604698985
CGTGGGTTAACCACGCTCAG	4485093	-	TRUE	lptF	TRUE	4484241	4485341	+	-4.44376908093952	2.2137541376488e-15	0.792771081232664
GATGAAGTGGGTCGTTGTGG	4175449	+	FALSE	secE	TRUE	4175381	4175764	+	-4.44285437784364	2.36208903318385e-16	0.792804899032736
CGCGGAAGTGTTCGGGATTA	193586	-	TRUE	dxr	TRUE	193521	194717	+	-4.43943260512995	6.23639716210278e-09	0.792931432146777
GCATCCGGTGAGCGGTAAAC	387612	+	FALSE	tauD	FALSE	387019	387870	+	-4.43774111965553	3.45265479329508e-13	0.792993996201087
CATGCGGGTAAAGCGTTTCG	2699880	+	TRUE	recO	FALSE	2699763	2700491	-	-4.43736636454276	1.97927701098873e-31	0.79300785884398
GCTCAATGAAGGGCTGCGCG	670771	-	FALSE	holA	TRUE	669797	670828	-	-4.43676563644749	1.45312750495278e-26	0.793030081510806
TTCTTTGTCGAAAATCAGCT	129101	-	TRUE	lpd	FALSE	127912	129336	+	-4.43620035517888	9.52603288042234e-11	0.793050994034625
ACGGGCTATGGGTATTGCAG	2344140	-	TRUE	nrdA	TRUE	2342887	2345172	+	-4.43540755393738	8.64700316867801e-18	0.79308032549525
CCCGCACCGGAGCCACGGCC	206203	-	TRUE	dnaE	TRUE	205126	208608	+	-4.43322305324268	6.28442178403718e-21	0.793161157226329
ATAGAGATGCAAACGGATTT	189310	+	TRUE	map	TRUE	188712	189506	-	-4.43281760146591	9.96735874037744e-06	0.793176161721139
ATGCAGCACTTTCGGAAGAT	3913161	+	TRUE	glmU	TRUE	3911853	3913223	-	-4.42944616296642	4.67560257728432e-10	0.793300950044093
GCCAGAGGCGACGCGGCTTG	2430945	+	TRUE	folC	TRUE	2429696	2430964	-	-4.42684505308902	1.93935481698093e-31	0.793397252739697
CGGTGCCAGCCCTAACGGAC	3339745	-	TRUE	kdsD	FALSE	3339288	3340274	+	-4.42653612804035	1.04717584899649e-23	0.793408691839487
TGATGCATCGCATGCAGCAG	3332446	-	TRUE	ispB	TRUE	3331732	3332703	+	-4.42597398931368	1.78468204158226e-23	0.793429507964438
TGCGCGATAATCCGCCACGG	3811577	-	TRUE	dfp	TRUE	3810754	3811974	+	-4.42430475645954	3.8875236687437e-30	0.793491326474639
CGACTTTATTGCCCACACGG	4196575	-	TRUE	hemE	FALSE	4195739	4196803	+	-4.42420935439784	7.30454069003838e-62	0.793494859893644
GATCCATCAGGAAACCTCTA	1254943	-	FALSE	ycgV	FALSE	1252308	1255175	-	-4.41433977831455	2.95054166481863e-05	0.793860570813172
CAGTGCGGTGAGGAATTGGC	958540	-	TRUE	aroA	FALSE	958035	959318	+	-4.41233328046182	7.37115425284602e-18	0.793934961563112
CTACAGGGATCACCGAACCA	3381199	-	TRUE	degS	TRUE	3380222	3381289	+	-4.4114298912346	1.53341314527475e-23	0.793968459199423
GCAAACAGTTCCAGTGGTTG	21575	-	TRUE	ribF	TRUE	21407	22348	+	-4.41019046530116	1.25555698343274e-35	0.794014421662964
TCTCTTCATAGAGCGCCAGA	204651	-	TRUE	rnhB	FALSE	204493	205089	+	-4.40884091436424	3.47873026733171e-22	0.794064474018015
GTTCAGCGTACCTTCCGGAC	28612	-	TRUE	dapB	FALSE	28374	29195	+	-4.40845846757915	6.49496671348361e-69	0.794078659411405
AGCATGTCTTCCAGCAGGAT	1260650	+	TRUE	prs	TRUE	1260151	1261098	-	-4.40552603208116	1.09508255717333e-13	0.794187443677934
GGCTAAACCACAGCAGCGCC	972546	+	TRUE	elyC	FALSE	971845	972624	-	-4.4051556526601	1.8507378017877e-48	0.794201185726362
CGCTGGGTCGCCCAGACCTT	58837	+	FALSE	yabP	FALSE	58474	59124	+	-4.40151741367529	7.81453971159003e-15	0.794336199223763
GGTTCGACCAGCGTATAAGT	4393788	-	TRUE	tsaE	TRUE	4393608	4394069	+	-4.39758299599683	1.14262886549468e-29	0.794482255457565
TACCTGTGGTCGCGCTTGTC	2635352	-	FALSE	der	TRUE	2633906	2635378	-	-4.39515384653717	4.12733489900125e-132	0.79457245888192
CTGATCGGGATGCATACGGA	4017509	-	TRUE	ubiE	FALSE	4016878	4017633	+	-4.39451410758299	7.4265314271531e-09	0.794596218194766
ATTAAAGGCATGGTAGTGCC	438683	-	FALSE	dxs	TRUE	437539	439401	-	-4.39445206678061	0.000186408970821317	0.794598522408343
GGTACGCTGGTTACCCGGGC	1347549	-	FALSE	yciW	FALSE	1347004	1348131	-	-4.39386302843209	4.04835391016106e-29	0.794620400130976
CGCCTGATCCGCGATAGAGC	3212387	-	TRUE	rpoD	TRUE	3211069	3212910	+	-4.39358393452874	6.65839008899539e-17	0.794630766496417
TTTCCACATCACGCGCCAGA	968047	-	TRUE	lpxK	TRUE	967589	968575	+	-4.39039311438672	1.74659802199179e-36	0.794749302132562
CTCAAACTCGCCCCTGCCCG	2660187	+	NA	NA	NA	NA	NA	NA	-4.38463337428074	3.61643735061858e-40	0.794963360019343
ATCGGGAGTGACGTAATTTG	936586	+	NA	NA	NA	NA	NA	NA	-4.38384657741736	1.75987119398624e-08	0.794992609886802
ATTGAGCATTACCTGCAACC	1155960	+	FALSE	holB	TRUE	1154985	1155989	+	-4.38346008647557	5.10202911632138e-23	0.795006978816867
AGGCTGGTCGTGCATCAACC	1746635	-	TRUE	ydhS	FALSE	1745155	1746759	+	-4.38314690048119	3.85118567163814e-75	0.795018622802308
CTTCCGTCAGGTTGTGCGGC	2336896	+	TRUE	gyrA	TRUE	2334815	2337442	-	-4.3749593002457	8.28238519206703e-29	0.795323151787455
TGCAGAGAGGGAATAGGCGG	2749412	-	TRUE	nadK	TRUE	2748853	2749731	+	-4.37450513223739	6.92564659396317e-07	0.795340050907673
ACTTCAAAGTCAAACTCACG	939035	-	TRUE	serS	TRUE	938651	939943	+	-4.36419409816073	2.91329263847167e-07	0.7957239071079
CCAGCGGGTTTCTTCAATCT	772587	-	TRUE	cydB	FALSE	772265	773404	+	-4.36359539274309	1.07871377381998e-15	0.795746206922392
ACCAGTTGCTGGTTTTCTTG	3432446	-	TRUE	fmt	TRUE	3432236	3433183	+	-4.36176700293289	4.98482963607597e-08	0.7958143161877
AACTTATAGGTTTAGTGTTG	2531752	-	NA	NA	NA	NA	NA	NA	-4.358379724202	1.43844442586371e-07	0.795940526365708
TACGAACTGCGGTTCCGGGA	1489989	-	FALSE	hokB	FALSE	1489946	1490095	-	-4.35668436311509	3.19125786646619e-11	0.796003710639678
TGATCCTGGACCGTATAAGC	3923913	+	NA	NA	NA	NA	NA	NA	-4.35358484484966	1.70326903906139e-10	0.796119252271605
GGCGATTTTTCGGCATTCAT	2337586	-	NA	NA	NA	NA	NA	NA	-4.35312521887338	1.06680106956e-59	0.796136388736868
GCACCAGTTCCCCCCGCGTG	212801	-	TRUE	tilS	TRUE	212331	213629	+	-4.35280766085454	2.91415276711635e-74	0.796148228842317
CGGACGCGCAGGAGCGGCAG	1140441	+	TRUE	rne	TRUE	1140405	1143590	-	-4.35170572507452	3.57305285998951e-06	0.796189317092167
TCGCCCGCAACCAAAATTTG	1115880	+	NA	NA	NA	NA	NA	NA	-4.35016420391491	1.31518968352525e-06	0.796246803426587
GAGCTAACGACCCGAGTGGT	780360	-	TRUE	valZ	FALSE	780291	780366	+	-4.34258606756065	6.11506128475487e-32	0.79652952768638
TCTCTGGTTGCCGGTATCAT	4587687	-	FALSE	yjiY	FALSE	4587152	4589302	-	-4.34175962980375	2.95415335390837e-53	0.796560372475544
TGGGTGCCTGGGGACTGGGC	3722943	-	FALSE	glyQ	TRUE	3722430	3723341	-	-4.34173842245903	1.32768159324018e-06	0.796561164019797
ACGTTAACGATTTGTGGCGT	960368	+	NA	NA	NA	NA	NA	NA	-4.34152218937814	1.26651377196802e-72	0.796569234806552
TAATCAGCGAACGTACGGTG	883738	-	TRUE	mdfA	FALSE	882896	884128	+	-4.3410732567055	4.58658040602602e-25	0.796585991506237
GGTTGTGCAGGGGCGGGCTT	3871109	-	FALSE	dgoA	FALSE	3871018	3871635	-	-4.34044883086221	1.71198651143238e-20	0.796609299773249
CGTTAACGGCCCAATCTCGC	23101	+	FALSE	ileS	TRUE	22391	25207	+	-4.33839272714271	7.31992509271511e-27	0.796686058663443
TTATCGCGCTGGGGTTGGGC	4429256	+	FALSE	cycA	FALSE	4427887	4429299	+	-4.33670084657002	1.80420549813662e-41	0.796749231394545
CCATACACAGGGAACAGCCA	133912	-	TRUE	acnB	FALSE	131615	134212	+	-4.33613508040803	1.07418814828957e-14	0.796770358639616
TGGAACCCAGCGCACAACCG	104761	-	TRUE	ftsA	TRUE	103982	105244	+	-4.33533352007129	1.33244941934883e-36	0.796800292997866
CAGGCACAGAGCGGTCTGAC	3883444	+	FALSE	yidC	TRUE	3883099	3884745	+	-4.33523590372911	7.45203509876962e-26	0.796803938644458
AGTAGCGCGCCGACTAATCC	3208321	+	TRUE	tsaD	TRUE	3207552	3208565	-	-4.33361558362632	3.1093838870264e-33	0.796864457098759
TTTAATCAGGTCAACCAGGA	4243786	+	TRUE	malE	FALSE	4243252	4244442	-	-4.3319507627335	0.00029145357493117	0.796926647219656
CGGGAAGCGAAGGGCCTCAC	3430791	-	FALSE	smf	FALSE	3430458	3431582	-	-4.33000126100608	1.56338163525832e-14	0.796999484059016
AGCGAAGTCGTCAAAGGTGA	2194030	-	TRUE	metG	TRUE	2192322	2194355	+	-4.32993732735042	3.67109839482034e-28	0.79700187295917
CATAATCAGTGCGCCGGTCT	125888	-	TRUE	aceF	FALSE	125695	127587	+	-4.32948587565544	3.83731817036254e-57	0.797018741994296
TAATTGGCGAACCAATCTTC	3474249	+	TRUE	yheO	FALSE	3473740	3474462	-	-4.32910130725999	6.76933368818983e-11	0.7970331124178
AGCGCCGTGGTCACGGGTGC	3972624	+	FALSE	rffC	FALSE	3972619	3973164	+	-4.32746287975953	4.82208270834321e-31	0.797094342437401
CGAGAAGTCTTCGTGCCCCG	4607702	-	TRUE	prfC	FALSE	4607437	4609026	+	-4.32466626984001	5.78572972501514e-46	0.797198876872625
TTAACATTCGCACCGGGCTG	1377118	+	FALSE	ycjT	FALSE	1375908	1378175	+	-4.31986390016913	1.24836695134533e-13	0.797378448549343
AGTAAAGAGGAGTTATCCCC	2616728	+	TRUE	hda	FALSE	2616097	2616798	-	-4.31537140735319	5.61673061252051e-06	0.797546506467886
AGACACTCCGTATCCGGGCG	1265587	-	TRUE	prmC	TRUE	1265317	1266150	+	-4.31348045656952	7.08253934805348e-56	0.797617265497341
GGGTGGCGGTATCATCGGTC	128475	+	FALSE	lpd	FALSE	127912	129336	+	-4.30939865083074	2.68632222670678e-77	0.797770048726235
TAACCCCATCGCGTCCGGCA	4195977	-	TRUE	hemE	FALSE	4195739	4196803	+	-4.30925725607906	3.52880511639573e-39	0.797775342223637
CTCCCAGCAACCTGACCATC	2578823	+	FALSE	tktB	FALSE	2577658	2579661	+	-4.30676934067192	7.17592334425247e-47	0.797868495602905
CCGTTTCGTGGAAGATAACT	3722978	-	FALSE	glyQ	TRUE	3722430	3723341	-	-4.30283904463012	6.09138965503809e-11	0.798015699427877
CGTTATGGACGTTGATGCCC	4253652	+	TRUE	plsB	TRUE	4252066	4254489	-	-4.30277992361589	8.6606845852639e-80	0.798017914138713
GCAGCGCAGGAGATTTGCGC	388921	+	TRUE	hemB	TRUE	387977	388951	-	-4.30119596610867	1.68780107694355e-33	0.798077254772356
CCAGCAACTGGGCGACGGCC	531130	+	TRUE	allS	FALSE	530519	531445	-	-4.28803238628679	5.03690190057447e-24	0.798570750528873
CAGATCCGGTTCGCCATGTT	497820	-	TRUE	hemH	TRUE	497279	498241	+	-4.28746020539827	5.07343715651433e-123	0.798592215133724
AGATATCTTTACCGCGCAGG	979718	-	TRUE	mukB	TRUE	975549	980009	+	-4.28713651287772	7.70283125874335e-09	0.798604358539055
TCTTCACGGTAGCGCGTTTC	158534	+	TRUE	pcnB	FALSE	157729	159126	-	-4.28313648446784	3.12345083585321e-34	0.798754451084143
TTCAGACATCTCAGAACCTC	4175752	-	TRUE	secE	TRUE	4175381	4175764	+	-4.28289440558515	7.38704218182946e-19	0.798763536389054
TAACGATGTAGTCGACGTCA	109241	-	TRUE	secA	TRUE	108279	110984	+	-4.28074545161364	1.68777018555126e-60	0.798844196442891
ACTGGTTGGCTAATTGACTC	1939722	+	TRUE	znuA	FALSE	1939675	1940607	-	-4.27926245438644	1.0615660044409e-09	0.798899869600305
GCGCAGCAATGCGCCCCCAC	1483118	-	TRUE	hrpA	FALSE	1481142	1484987	+	-4.27779665869842	3.54395889917289e-33	0.798954904621215
ATATAGTTCACATCCACGCC	2338267	-	TRUE	ubiG	FALSE	2337589	2338311	+	-4.27741396475324	2.52539438713071e-44	0.79896927456321
GGAACAACGAACCGGCGGGT	413874	-	FALSE	sbcC	FALSE	411831	414977	-	-4.27711786960397	7.40978677208793e-09	0.798980393123912
GATGTGCGGAATAACCTGCA	2907353	+	TRUE	pyrG	TRUE	2906051	2907688	-	-4.27125995581428	5.51623699757943e-17	0.79920042514234
GATGACCATGGTGGAGCGCC	2304581	-	FALSE	mqo	FALSE	2303130	2304776	-	-4.27090601262109	5.84339803164418e-15	0.799213723661467
GCTTCCCAGTCGTAATGCAG	2344666	-	TRUE	nrdA	TRUE	2342887	2345172	+	-4.26968345179554	5.89856563682051e-26	0.799259661693033
GTTGCCCTACGGAATCCGTC	994422	+	TRUE	ssuD	FALSE	994066	995211	-	-4.26717340239987	6.30585450201016e-114	0.799353993985945
AGCTTTTCTTATCATCCAGC	206892	-	TRUE	dnaE	TRUE	205126	208608	+	-4.26221644119716	1.23689206707389e-17	0.799540351167774
TTGACCCGGTAACCCGCCTG	1988794	-	TRUE	tyrP	FALSE	1987705	1988916	+	-4.26060099070028	4.57824642183522e-33	0.799601102877387
AAGAGTTGTCGTGCCTGACT	1737150	-	FALSE	ydhB	FALSE	1736890	1737822	-	-4.26025714840969	6.43204189006574e-73	0.79961403483173
CGGCAGACTGGAGTGGACGG	689954	+	TRUE	lnt	TRUE	688566	690104	-	-4.2587005175732	0.000166491188133116	0.799672585158589
CACATCGCCTTCGCGCAGTC	1239918	+	TRUE	cvrA	FALSE	1239558	1241294	-	-4.25478446919109	7.23980979360092e-81	0.79981991935235
ATCGTCAGCTCTTTTGAGAC	2702853	+	TRUE	lepB	TRUE	2702357	2703331	-	-4.25358138501999	3.6899879669548e-24	0.799865194107097
CACAATATTAGCCTGCCGCC	118853	+	FALSE	ampD	FALSE	118733	119284	+	-4.25319421615237	3.21274709181288e-22	0.799879765229833
GCATGGTTTCTGCATAAGGA	3916162	+	TRUE	atpG	FALSE	3915425	3916288	-	-4.25211872097582	4.82349000435107e-05	0.799920244338792
ACCCTATATATGACCCGAAC	553696	-	NA	NA	NA	NA	NA	NA	-4.25107388264416	1.71612497467599e-11	0.799959573519904
GTCCAGTTCGTCCTGCAGAC	4369589	-	TRUE	groL	TRUE	4369048	4370694	+	-4.24944397974428	1.37077198754174e-38	0.800020933075002
GTCGTCGCGTTCTTTGATCT	960950	-	TRUE	cmk	FALSE	960424	961107	+	-4.249045833042	6.96741190766206e-48	0.800035923192618
GCATCCGGCGCTTCCAGCAG	50960	+	TRUE	apaH	FALSE	50380	51222	-	-4.24896758226069	8.58838151804425e-39	0.800038869379806
TCTGCGGCGGCGGTGAAGGC	3508571	-	FALSE	yhfX	FALSE	3507835	3508998	-	-4.24810201778863	7.18085220214994e-16	0.800071459830522
GGGATAACGTTCTTGCACCG	4163680	-	TRUE	murI	TRUE	4163451	4164308	+	-4.24456473293066	5.97227279370464e-90	0.800204674170082
GTGCCCACATTTACGCGATG	3396746	+	TRUE	mreD	TRUE	3396409	3396897	-	-4.24178694697655	6.31919684113452e-101	0.800309316840206
TCGAAAGTGACTGTTTGGTT	696469	+	NA	NA	NA	NA	NA	NA	-4.23898918651145	2.4359093297995e-66	0.800414739642903
CTTCGGCCAGCATACCTGAC	1260225	+	TRUE	prs	TRUE	1260151	1261098	-	-4.23817416229718	1.46672518856886e-29	0.800445455908307
GGACGGCACACTCACGAGCG	434381	-	TRUE	nusB	FALSE	434361	434780	+	-4.22801704159303	3.08348402640689e-80	0.800828450754073
ACCGTGTTCAGCCAGCGCTT	128108	-	TRUE	lpd	FALSE	127912	129336	+	-4.22344849914828	9.40730887952657e-41	0.80100083644193
CCCTGCGCAATGACATAAGG	203103	-	TRUE	lpxA	TRUE	202560	203348	+	-4.22102742480755	5.17435704570487e-13	0.801092221393902
TTTACCGGACCCAGTGAACC	217772	+	TRUE	proS	TRUE	217057	218775	-	-4.22024899580202	6.76192139660435e-17	0.801121608109457
AAGTAACCTGGCGGTGATTT	336361	+	FALSE	yahF	FALSE	336002	337549	+	-4.2187530712063	0.00014106292710395	0.801178087277376
GCCGGTTACCAGCGAACGGA	4389326	+	TRUE	rsgA	FALSE	4388480	4389532	-	-4.2175361607472	1.64684237382038e-36	0.801224038041245
CTACACCCAGGATGTCGGCA	25129	+	FALSE	ileS	TRUE	22391	25207	+	-4.21537736545234	4.97317818981574e-61	0.80130556752119
ATAAATCATCGGCCACTGGC	3499903	-	TRUE	frlB	FALSE	3499290	3500312	+	-4.21388916243732	3.13478718294302e-23	0.801361780945914
ACGGCAGGCACGCGATTACC	1797855	+	TRUE	rpmI	FALSE	1797826	1798023	-	-4.2129324944842	1.03238052864687e-39	0.801397921028616
ACCGATGTGGAACGTACGCA	4186164	-	TRUE	rpoC	TRUE	4183373	4187596	+	-4.21259961738596	4.41243051413473e-17	0.801410496904241
AGCATCTCGGCTACCCGCGC	102091	-	TRUE	murC	TRUE	100765	102240	+	-4.20583207789137	2.88957865895743e-52	0.801666255658213
GTGCAGGCGCAAAGCCACGG	4123555	+	TRUE	priA	FALSE	4122635	4124833	-	-4.20241573973682	2.76086688319917e-09	0.801795427873778
AATCGATATTCGGATGGGTC	2734464	-	TRUE	bamD	TRUE	2734168	2734905	+	-4.20185121056644	8.18012195487246e-26	0.801816776807096
AGAACGCTCGGCGGACGCAT	133401	-	TRUE	acnB	FALSE	131615	134212	+	-4.19918699187866	9.86660337219788e-14	0.801917545541376
ACCGGAACCGGATTTCCGTT	3200100	-	TRUE	cca	TRUE	3199913	3201151	+	-4.19433445377491	1.59332734247969e-34	0.80210114816661
GACGTTGACGGCGCGCCACC	4046795	-	TRUE	polA	TRUE	4044989	4047775	+	-4.19408838279204	5.08508269540347e-100	0.8021104608492
ACCGAGAATCGTGGCGGGAT	4023678	-	TRUE	ubiD	TRUE	4023011	4024504	+	-4.19385900820933	5.70227106502399e-33	0.802119141842698
ACAGCGCGCGCGCCGCAGCC	4119920	+	TRUE	hslV	FALSE	4119780	4120310	-	-4.19337796783362	2.68761588158179e-22	0.802137348081172
CCGTTGAAGGCGAGGGCTTC	1726584	-	TRUE	rnt	FALSE	1726371	1727018	+	-4.19197210528521	8.94573537592548e-61	0.802190561385283
TACGCTGGTAGATCTCTTCA	2817039	+	TRUE	csrA	TRUE	2816983	2817168	-	-4.19009204745439	1.33236515861647e-31	0.802261734490306
CAGTTTACCTACGGTTTCGT	4369508	-	TRUE	groL	TRUE	4369048	4370694	+	-4.18906621275751	1.47661075489686e-51	0.802300574706999
ACGCAGGGTCGTCATCTGAA	1796850	+	TRUE	pheS	TRUE	1795983	1796966	-	-4.18889001619197	2.28780924068635e-30	0.802307246250703
GGCCGCGCGGACCCAGAACC	4177285	-	TRUE	rplA	FALSE	4176902	4177606	+	-4.18809056446236	4.77679350441236e-20	0.802337518252503
GCGTTAATCACGAACTGCGC	3314710	+	TRUE	nusA	TRUE	3314061	3315548	-	-4.187522418323	3.24360407077274e-186	0.802359033036273
CGTCGTCATCACACCGCCCA	13370	-	TRUE	dnaK	FALSE	12163	14079	+	-4.18731214897957	2.62031140375971e-118	0.802366995891867
GCATTTGTGACCACCGGTTT	801434	+	FALSE	ybhI	FALSE	801110	802543	+	-4.18595652254525	2.27078824957279e-31	0.802418336972857
CCCCCGCACCGAAAGGTCCG	3948489	+	NA	NA	NA	NA	NA	NA	-4.18515037672599	5.31559820229811e-10	0.802448870916498
TGAAGGCCGTCCGCACATTC	33822	+	FALSE	carB	FALSE	30817	34038	+	-4.18497934658373	8.78918887959705e-96	0.802455349230322
AATCACAGTATAAGCGCGCT	3397266	+	TRUE	mreC	TRUE	3396897	3398000	-	-4.18420680362285	2.90357393223309e-08	0.802484613069993
[truncated: 57,247 more rows]
